# Supplementary material for: Salecan ameliorates liver injury by regulating gut microbiota and its metabolites
Source: Royal Society of Chemistry journal article supplement (doi:10.1039/d2fo02210a), 2022-01-01
Supplement: d2fo02210a1.xlsx [file d2fo02210a1.xlsx]

## Sheet: otu_taxa_table
	Vehicle1	Vehicle2	Vehicle3	Vehicle4	Vehicle5	CCl4 1	CCl4 2	CCl4 3	CCl4 4	CCl4 5	Salecan1	Salecan2	Salecan3	Salecan4	Salecan5	taxonomy
OTU2	2132	848	2503	1019	1874	1112	3349	3323	2562	3760	2095	2828	5535	2536	2520	k__Bacteria	p__Bacteroidota	c__Bacteroidia	o__Bacteroidales	f__Prevotellaceae	g__Alloprevotella	s__uncultured_Bacteroidales
OTU1	2536	1901	2721	1479	1834	1208	2700	2647	1954	1681	1404	1991	1998	2858	1513	k__Bacteria	p__Bacteroidota	c__Bacteroidia	o__Bacteroidales	f__Muribaculaceae	g__Muribaculaceae	s__uncultured_bacterium
OTU3	1924	697	1332	1228	776	3077	1320	1235	1754	2312	2027	2109	1215	1385	1716	k__Bacteria	p__Firmicutes	c__Clostridia	o__Lachnospirales	f__Lachnospiraceae	g__Lachnospiraceae_NK4A136_group	s__uncultured_bacterium
OTU6	963	1641	1307	2023	2918	301	1369	528	577	688	127	771	1210	1208	629	k__Bacteria	p__Bacteroidota	c__Bacteroidia	o__Bacteroidales	f__Muribaculaceae	g__Muribaculaceae	s__uncultured_bacterium
OTU7	1318	1471	455	320	223	2868	581	1624	2441	1075	46	598	288	564	1177	k__Bacteria	p__Firmicutes	c__Clostridia	o__Clostridia_UCG-014	f__Clostridia_UCG-014	g__Clostridia_UCG-014	s__unidentified
OTU4	1097	602	1254	600	471	2983	786	788	930	1135	1482	554	910	821	560	k__Bacteria	p__Firmicutes	c__Clostridia	o__Lachnospirales	f__Lachnospiraceae	g__Lachnospiraceae_NK4A136_group	s__uncultured_Clostridiales
OTU11	1260	1681	1358	18	530	601	82	513	445	199	62	1166	717	536	788	k__Bacteria	p__Firmicutes	c__Clostridia	o__Lachnospirales	f__Lachnospiraceae	g__[Eubacterium]_ruminantium_group	s__uncultured_bacterium
OTU8	476	360	799	375	404	179	1059	1251	486	603	854	505	955	820	389	k__Bacteria	p__Bacteroidota	c__Bacteroidia	o__Bacteroidales	f__Muribaculaceae	g__Muribaculaceae	s__uncultured_bacterium
OTU5	24	1834	805	191	117	485	13	1396	948	276	281	560	201	1676	350	k__Bacteria	p__Firmicutes	c__Clostridia	o__Oscillospirales	f__[Eubacterium]_coprostanoligenes_group	g__[Eubacterium]_coprostanoligenes_group
OTU15	325	751	596	391	588	509	1332	758	420	898	244	438	855	644	477	k__Bacteria	p__Bacteroidota	c__Bacteroidia	o__Bacteroidales	f__Muribaculaceae	g__Muribaculaceae
OTU20	534	470	568	294	408	191	878	403	380	702	248	980	908	799	501	k__Bacteria	p__Proteobacteria	c__Gammaproteobacteria	o__Burkholderiales	f__Sutterellaceae	g__Parasutterella	s__Burkholderiales_bacterium
OTU16	373	345	372	268	358	413	617	538	584	341	734	601	750	959	772	k__Bacteria	p__Bacteroidota	c__Bacteroidia	o__Bacteroidales	f__Muribaculaceae	g__Muribaculum	s__uncultured_bacterium
OTU18	680	242	608	452	639	337	894	486	349	623	95	262	529	473	494	k__Bacteria	p__Bacteroidota	c__Bacteroidia	o__Bacteroidales	f__Muribaculaceae	g__Muribaculaceae	s__uncultured_bacterium
OTU24	312	498	374	609	531	367	943	756	894	703	156	267	249	184	189	k__Bacteria	p__Bacteroidota	c__Bacteroidia	o__Bacteroidales	f__Muribaculaceae	g__Muribaculaceae	s__uncultured_bacterium
OTU10	91	2168	982	271	620	265	120	1	88	67	7	36	34	898	688	k__Bacteria	p__Verrucomicrobiota	c__Verrucomicrobiae	o__Verrucomicrobiales	f__Akkermansiaceae	g__Akkermansia	s__Akkermansia_muciniphila
OTU9	362	1182	265	59	47	0	81	867	514	691	57	304	840	535	467	k__Bacteria	p__Firmicutes	c__Clostridia	o__Lachnospirales	f__Lachnospiraceae	g__[Eubacterium]_fissicatena_group	s__uncultured_bacterium
OTU13	383	1911	1449	360	349	79	14	237	207	59	9	85	72	479	127	k__Bacteria	p__Firmicutes	c__Clostridia	o__Clostridia_UCG-014	f__Clostridia_UCG-014	g__Clostridia_UCG-014
OTU19	284	176	357	1190	1028	525	99	314	265	209	527	256	167	150	298	k__Bacteria	p__Desulfobacterota	c__Desulfovibrionia	o__Desulfovibrionales	f__Desulfovibrionaceae	g__Desulfovibrio	s__uncultured_bacterium
OTU22	378	181	302	302	261	256	423	222	328	153	837	557	591	1089	195	k__Bacteria	p__Bacteroidota	c__Bacteroidia	o__Bacteroidales	f__Muribaculaceae	g__Muribaculaceae	s__uncultured_bacterium
OTU67	301	134	369	570	516	447	172	227	280	318	632	454	304	187	447	k__Bacteria	p__Firmicutes	c__Clostridia	o__Oscillospirales	f__Oscillospiraceae	g__Colidextribacter
OTU30	515	420	361	304	278	645	274	384	345	172	114	156	122	180	155	k__Bacteria	p__Firmicutes	c__Clostridia	o__Lachnospirales	f__Lachnospiraceae	g__[Eubacterium]_xylanophilum_group	s__uncultured_bacterium
OTU29	784	334	386	227	271	240	313	261	319	347	40	137	157	269	245	k__Bacteria	p__Patescibacteria	c__Saccharimonadia	o__Saccharimonadales	f__Saccharimonadaceae	g__Candidatus_Saccharimonas	s__uncultured_bacterium
OTU52	389	307	277	234	403	164	352	325	327	189	118	217	262	192	309	k__Bacteria	p__Bacteroidota	c__Bacteroidia	o__Bacteroidales	f__Muribaculaceae	g__Muribaculaceae	s__uncultured_bacterium
OTU41	116	158	119	217	236	158	693	252	143	462	219	278	190	353	412	k__Bacteria	p__Bacteroidota	c__Bacteroidia	o__Bacteroidales	f__Muribaculaceae	g__Muribaculaceae	s__uncultured_Bacteroidales
OTU12	39	132	149	791	709	421	114	162	168	179	109	190	208	146	144	k__Bacteria	p__Firmicutes	c__Clostridia	o__Lachnospirales	f__Lachnospiraceae	g__Lachnospiraceae_NK4A136_group
OTU89	367	293	147	144	109	345	251	314	443	222	52	217	159	199	242	k__Bacteria	p__Firmicutes	c__Clostridia	o__Clostridia_UCG-014	f__Clostridia_UCG-014	g__Clostridia_UCG-014
OTU14	0	1193	359	0	223	0	217	24	0	310	1	102	251	377	571	k__Bacteria	p__Firmicutes	c__Clostridia	o__Oscillospirales	f__Ruminococcaceae	g__Ruminococcus
OTU26	198	118	84	527	238	485	112	157	245	165	196	402	128	186	234	k__Bacteria	p__Firmicutes	c__Clostridia	o__Lachnospirales	f__Lachnospiraceae	g__Lachnoclostridium
OTU23	100	55	122	87	125	98	799	295	77	277	394	331	180	447	173	k__Bacteria	p__Bacteroidota	c__Bacteroidia	o__Bacteroidales	f__Rikenellaceae	g__Rikenellaceae_RC9_gut_group
OTU40	58	231	263	714	487	194	50	42	270	77	194	128	302	80	115	k__Bacteria	p__Firmicutes	c__Clostridia	o__Lachnospirales	f__Lachnospiraceae	g__Lachnospiraceae_NK4A136_group
OTU34	1	18	3	1855	683	13	40	12	11	31	12	11	8	9	100	k__Bacteria	p__Firmicutes	c__Clostridia	o__Lachnospirales	f__Lachnospiraceae	g__Lachnospiraceae_NK4A136_group	s__uncultured_Clostridiales
OTU17	208	159	197	139	112	160	293	125	171	184	77	326	272	232	321	k__Bacteria	p__Bacteroidota	c__Bacteroidia	o__Bacteroidales	f__Rikenellaceae	g__Alistipes	s__uncultured_bacterium
OTU21	250	70	186	211	146	405	116	131	138	276	231	266	153	96	218	k__Bacteria	p__Firmicutes	c__Clostridia	o__Lachnospirales	f__Lachnospiraceae	g__uncultured	s__uncultured_bacterium
OTU31	208	251	262	125	150	40	34	99	55	175	44	185	641	143	501	k__Bacteria	p__Firmicutes	c__Bacilli	o__Erysipelotrichales	f__Erysipelotrichaceae	g__Faecalibaculum	s__Faecalibaculum_rodentium
OTU39	179	114	206	161	141	155	219	168	218	141	359	214	216	202	187	k__Bacteria	p__Bacteroidota	c__Bacteroidia	o__Bacteroidales	f__Rikenellaceae	g__Alistipes	s__uncultured_bacterium
OTU42	66	31	60	38	32	43	278	474	606	605	17	61	235	36	195	k__Bacteria	p__Firmicutes	c__Clostridia	o__Peptostreptococcales-Tissierellales	f__Peptostreptococcaceae	g__Romboutsia	s__Romboutsia_ilealis
OTU25	189	157	98	209	288	104	196	263	136	160	264	187	233	165	153	k__Bacteria	p__Bacteroidota	c__Bacteroidia	o__Bacteroidales	f__Prevotellaceae	g__Prevotellaceae_UCG-001	s__uncultured_bacterium
OTU37	172	116	224	229	311	123	277	302	155	133	64	119	163	145	139	k__Bacteria	p__Bacteroidota	c__Bacteroidia	o__Bacteroidales	f__Rikenellaceae	g__Alistipes
OTU77	183	45	131	225	220	186	77	137	255	105	413	221	111	88	190	k__Bacteria	p__Firmicutes	c__Clostridia	o__Oscillospirales	f__Oscillospiraceae	g__uncultured	s__Clostridium_sp.
OTU54	161	1	108	0	1	136	258	506	364	567	13	98	78	48	168	k__Bacteria	p__Firmicutes	c__Clostridia	o__Clostridiales	f__Clostridiaceae	g__Clostridium_sensu_stricto_1
OTU48	98	30	80	25	58	76	85	375	259	473	235	211	197	109	252	k__Bacteria	p__Firmicutes	c__Bacilli	o__Erysipelotrichales	f__Erysipelotrichaceae	g__Turicibacter	s__uncultured_bacterium
OTU46	20	24	29	428	223	330	80	43	90	148	908	36	88	69	65	k__Bacteria	p__Firmicutes	c__Clostridia	o__Lachnospirales	f__Lachnospiraceae	g__Lachnospiraceae_NK4A136_group	s__Lachnospiraceae_bacterium
OTU60	337	261	242	91	129	104	220	182	90	144	70	126	153	130	142	k__Bacteria	p__Bacteroidota	c__Bacteroidia	o__Bacteroidales	f__Muribaculaceae	g__Muribaculaceae	s__uncultured_bacterium
OTU45	55	67	40	137	115	475	242	96	246	78	282	182	134	159	78	k__Bacteria	p__Bacteroidota	c__Bacteroidia	o__Bacteroidales	f__Bacteroidaceae	g__Bacteroides
OTU50	246	237	106	130	86	184	124	155	200	145	57	154	109	139	196	k__Bacteria	p__Firmicutes	c__Clostridia	o__Clostridia_UCG-014	f__Clostridia_UCG-014	g__Clostridia_UCG-014
OTU27	471	266	180	63	90	139	133	197	140	148	92	51	49	86	57	k__Bacteria	p__Bacteroidota	c__Bacteroidia	o__Bacteroidales	f__Muribaculaceae	g__Muribaculaceae
OTU38	133	160	108	93	105	54	195	128	307	150	92	98	158	253	219	k__Bacteria	p__Bacteroidota	c__Bacteroidia	o__Bacteroidales	f__Muribaculaceae	g__Muribaculaceae	s__uncultured_bacterium
OTU71	64	50	49	39	53	109	145	186	248	122	358	177	173	313	166	k__Bacteria	p__Bacteroidota	c__Bacteroidia	o__Bacteroidales	f__Bacteroidaceae	g__Bacteroides	s__Bacteroides_vulgatus
OTU36	131	172	83	165	229	102	300	222	182	165	59	75	62	82	87	k__Bacteria	p__Bacteroidota	c__Bacteroidia	o__Bacteroidales	f__Muribaculaceae	g__Muribaculaceae	s__uncultured_Bacteroidales
OTU53	49	52	213	64	97	49	330	83	67	117	315	119	137	177	102	k__Bacteria	p__Bacteroidota	c__Bacteroidia	o__Bacteroidales	f__Rikenellaceae	g__Alistipes	s__uncultured_bacterium
OTU94	52	37	109	94	83	266	68	125	172	97	359	131	71	74	110	k__Bacteria	p__Firmicutes	c__Clostridia	o__Oscillospirales	f__Oscillospiraceae	g__Oscillibacter
OTU108	244	13	100	8	9	6	598	162	59	316	16	138	11	22	90	k__Bacteria	p__Firmicutes	c__Clostridia	o__Lachnospirales	f__Lachnospiraceae	g__Lachnospiraceae_NK4A136_group	s__unidentified
OTU70	205	56	89	54	54	71	116	157	198	63	196	129	148	146	133	k__Bacteria	p__Bacteroidota	c__Bacteroidia	o__Bacteroidales	f__Muribaculaceae	g__Muribaculaceae	s__uncultured_bacterium
OTU58	166	31	59	176	122	115	86	23	46	189	69	330	55	85	269	k__Bacteria	p__Firmicutes	c__Clostridia	o__Lachnospirales	f__Lachnospiraceae	g__Lachnospiraceae_NK4A136_group
OTU49	83	6	25	124	126	25	26	18	248	51	50	172	296	64	419	k__Bacteria	p__Firmicutes	c__Clostridia	o__Oscillospirales	f__[Eubacterium]_coprostanoligenes_group	g__[Eubacterium]_coprostanoligenes_group	s__gut_metagenome
OTU35	263	0	68	184	134	67	145	89	214	5	111	182	40	38	38	k__Bacteria	p__Firmicutes	c__Clostridia	o__Oscillospirales	f__Ruminococcaceae	g__Ruminococcus	s__unidentified
OTU28	220	25	59	138	233	25	86	47	148	116	165	48	11	109	186	k__Bacteria	p__Firmicutes	c__Clostridia	o__Oscillospirales	f__Oscillospiraceae	g__uncultured	s__uncultured_Clostridiales
OTU59	88	75	105	71	70	126	134	152	126	75	99	112	112	150	63	k__Bacteria	p__Bacteroidota	c__Bacteroidia	o__Bacteroidales	f__Bacteroidaceae	g__Bacteroides	s__Bacteroides_caecimuris
OTU68	99	15	101	189	119	75	64	56	59	55	466	103	43	67	65	k__Bacteria	p__Firmicutes	c__Clostridia	o__Oscillospirales	f__Oscillospiraceae	g__uncultured	s__uncultured_bacterium
OTU63	118	85	59	96	109	149	52	93	107	92	71	90	132	81	148	k__Bacteria	p__Firmicutes	c__Clostridia	o__Oscillospirales	f__Oscillospiraceae	g__Colidextribacter
OTU61	53	25	136	410	380	36	14	10	17	28	208	54	36	24	106	k__Bacteria	p__Firmicutes	c__Clostridia	o__Lachnospirales	f__Lachnospiraceae
OTU51	70	39	39	17	12	37	47	87	217	255	27	73	196	152	258	k__Bacteria	p__Firmicutes	c__Bacilli	o__Lactobacillales	f__Lactobacillaceae	g__Lactobacillus	s__Lactobacillus_johnsonii
OTU43	94	130	63	100	126	76	125	114	105	62	58	65	84	93	127	k__Bacteria	p__Bacteroidota	c__Bacteroidia	o__Bacteroidales	f__Muribaculaceae	g__Muribaculaceae	s__uncultured_bacterium
OTU97	103	18	138	145	89	195	58	47	114	118	201	74	29	22	65	k__Bacteria	p__Firmicutes	c__Clostridia	o__Lachnospirales	f__Lachnospiraceae	g__uncultured	s__uncultured_bacterium
OTU80	122	29	75	198	124	269	35	26	27	32	14	82	116	106	120	k__Bacteria	p__Firmicutes	c__Clostridia	o__Clostridia_UCG-014	f__Clostridia_UCG-014	g__Clostridia_UCG-014
OTU86	70	73	56	45	57	12	157	122	65	67	154	87	145	190	72	k__Bacteria	p__Bacteroidota	c__Bacteroidia	o__Bacteroidales	f__Bacteroidaceae	g__Bacteroides
OTU57	66	37	44	176	143	317	52	21	48	58	93	66	27	32	76	k__Bacteria	p__Firmicutes	c__Clostridia	o__Lachnospirales	f__Lachnospiraceae	g__uncultured	s__mouse_gut
OTU32	437	134	39	1	1	96	34	67	70	37	7	96	96	55	72	k__Bacteria	p__Firmicutes	c__Clostridia	o__Clostridia_UCG-014	f__Clostridia_UCG-014	g__Clostridia_UCG-014	s__uncultured_bacterium
OTU91	39	193	39	20	14	104	112	39	216	169	5	57	29	52	192	k__Bacteria	p__Firmicutes	c__Clostridia	o__Clostridia_UCG-014	f__Clostridia_UCG-014	g__Clostridia_UCG-014	s__uncultured_rumen
OTU90	55	20	80	36	32	68	214	79	99	49	174	79	119	132	62	k__Bacteria	p__Bacteroidota	c__Bacteroidia	o__Bacteroidales	f__Marinifilaceae	g__Butyricimonas	s__uncultured_bacterium
OTU47	10	17	7	364	119	378	12	8	38	12	38	31	5	6	98	k__Bacteria	p__Deferribacterota	c__Deferribacteres	o__Deferribacterales	f__Deferribacteraceae	g__Mucispirillum	s__uncultured_bacterium
OTU65	28	20	38	265	188	79	50	55	60	53	97	122	78	34	70	k__Bacteria	p__Firmicutes	c__Clostridia	o__Lachnospirales	f__Lachnospiraceae	g__ASF356	s__uncultured_bacterium
OTU62	88	42	91	158	124	99	39	17	19	39	153	96	41	47	93	k__Bacteria	p__Desulfobacterota	c__Desulfovibrionia	o__Desulfovibrionales	f__Desulfovibrionaceae	g__Bilophila	s__uncultured_bacterium
OTU66	70	10	81	140	39	98	106	36	62	145	102	11	51	76	41	k__Bacteria	p__Firmicutes	c__Clostridia	o__Oscillospirales	f__Ruminococcaceae	g__[Eubacterium]_siraeum_group	s__uncultured_bacterium
OTU99	78	42	64	127	111	141	27	36	46	59	111	107	41	24	66	k__Bacteria	p__Firmicutes	c__Clostridia	o__Peptococcales	f__Peptococcaceae	g__uncultured
OTU79	36	19	22	177	204	168	36	20	36	51	138	53	21	16	50	k__Bacteria	p__Firmicutes	c__Clostridia	o__Lachnospirales	f__Lachnospiraceae
OTU55	56	45	51	19	20	97	70	119	67	333	15	14	25	32	41	k__Bacteria	p__Firmicutes	c__Bacilli	o__Lactobacillales	f__Lactobacillaceae	g__Lactobacillus	s__Lactobacillus_murinus
OTU109	56	59	15	61	43	85	39	88	107	63	45	87	85	57	101	k__Bacteria	p__Firmicutes	c__Clostridia	o__Oscillospirales	f__Oscillospiraceae	g__Colidextribacter	s__uncultured_bacterium
OTU72	149	32	20	39	36	41	31	39	32	29	90	147	46	68	221	k__Bacteria	p__Firmicutes	c__Clostridia	o__Lachnospirales	f__Lachnospiraceae	g__Marvinbryantia	s__uncultured_bacterium
OTU254	78	53	46	37	48	89	33	94	78	56	42	91	88	79	79	k__Bacteria	p__Firmicutes	c__Clostridia	o__Oscillospirales	f__Oscillospiraceae
OTU105	27	41	41	147	88	45	34	20	40	41	28	176	35	48	164	k__Bacteria	p__Firmicutes	c__Clostridia	o__Lachnospirales	f__Lachnospiraceae	g__GCA-900066575	s__uncultured_bacterium
OTU283	262	1	216	11	2	9	1	93	176	4	22	54	5	17	25	k__Bacteria	p__Firmicutes	c__Clostridia	o__Clostridia_UCG-014	f__Clostridia_UCG-014	g__Clostridia_UCG-014
OTU98	105	42	90	2	3	16	34	32	131	10	176	220	38	16	57	k__Bacteria	p__Firmicutes	c__Clostridia	o__Oscillospirales	f__Ruminococcaceae	g__Ruminococcus	s__unidentified
OTU156	70	21	36	171	125	96	38	32	40	49	74	38	39	33	39	k__Bacteria	p__Firmicutes	c__Clostridia	o__Lachnospirales	f__Lachnospiraceae	g__GCA-900066575	s__uncultured_bacterium
OTU100	100	94	47	63	45	74	26	51	48	40	38	77	34	86	88	k__Bacteria	p__Firmicutes	c__Clostridia	o__Oscillospirales	f__Oscillospiraceae	g__NK4A214_group	s__unidentified
OTU82	60	2	10	218	103	5	17	18	27	39	89	88	78	41	95	k__Bacteria	p__Firmicutes	c__Clostridia	o__Lachnospirales	f__Lachnospiraceae
OTU107	0	1	0	6	11	41	5	4	0	3	251	275	73	28	259	k__Bacteria	p__Firmicutes	c__Clostridia	o__Lachnospirales	f__Lachnospiraceae	g__Lachnospiraceae_NK4A136_group	s__uncultured_bacterium
OTU177	72	65	49	41	70	22	58	77	88	96	25	38	56	56	72	k__Bacteria	p__Bacteroidota	c__Bacteroidia	o__Bacteroidales	f__Muribaculaceae	g__Muribaculaceae	s__uncultured_bacterium
OTU83	110	32	41	11	6	28	25	26	25	59	181	71	104	15	120	k__Bacteria	p__Firmicutes	c__Clostridia	o__Lachnospirales	f__Lachnospiraceae	g__Lachnospiraceae_NK4A136_group
OTU75	247	9	97	28	22	21	49	12	50	10	26	85	38	90	53	k__Bacteria	p__Firmicutes	c__Clostridia	o__Lachnospirales	f__Lachnospiraceae	g__Roseburia
OTU104	60	23	28	67	46	59	71	47	40	49	94	40	43	113	46	k__Bacteria	p__Bacteroidota	c__Bacteroidia	o__Bacteroidales	f__Bacteroidaceae	g__Bacteroides	s__Bacteroides_thetaiotaomicron
OTU87	71	138	88	10	19	59	1	178	57	9	9	18	31	81	8	k__Bacteria	p__Bacteroidota	c__Bacteroidia	o__Bacteroidales	f__Prevotellaceae	g__Prevotellaceae_NK3B31_group	s__uncultured_bacterium
OTU95	38	18	54	93	64	64	38	24	31	19	241	60	48	38	33	k__Bacteria	p__Firmicutes	c__Clostridia	o__Oscillospirales	f__Oscillospiraceae	g__uncultured	s__uncultured_bacterium
OTU56	12	588	81	0	1	0	3	26	24	6	0	1	2	1	0	k__Bacteria	p__Firmicutes	c__Clostridia	o__Clostridia_UCG-014	f__Clostridia_UCG-014	g__Clostridia_UCG-014
OTU88	113	54	26	69	53	26	5	128	50	18	66	6	11	99	56	k__Bacteria	p__Firmicutes	c__Clostridia	o__Lachnospirales	f__Lachnospiraceae
OTU84	0	35	0	66	748	1	0	0	0	0	0	0	0	0	0	k__Bacteria	p__Firmicutes	c__Clostridia	o__Lachnospirales	f__Lachnospiraceae	g__Lachnospiraceae_NK4A136_group	s__uncultured_bacterium
OTU85	18	27	37	30	32	29	36	78	92	69	206	27	30	72	16	k__Bacteria	p__Bacteroidota	c__Bacteroidia	o__Bacteroidales	f__Rikenellaceae	g__Alistipes	s__uncultured_bacterium
OTU92	50	118	130	36	67	33	28	28	28	49	1	23	65	40	69	k__Bacteria	p__Actinobacteriota	c__Coriobacteriia	o__Coriobacteriales	f__Atopobiaceae
OTU239	9	1	16	3	2	206	16	5	0	65	12	174	33	43	177	k__Bacteria	p__Firmicutes	c__Clostridia	o__Lachnospirales	f__Lachnospiraceae	g__Lachnospiraceae_NK4A136_group	s__uncultured_Clostridiales
OTU74	50	41	34	41	57	36	35	52	48	101	73	55	50	30	54	k__Bacteria	p__Actinobacteriota	c__Coriobacteriia	o__Coriobacteriales	f__Eggerthellaceae	g__Enterorhabdus	s__uncultured_bacterium
OTU33	20	1	12	375	134	1	15	23	2	21	76	2	19	18	5	k__Bacteria	p__Firmicutes	c__Clostridia	o__Lachnospirales	f__Lachnospiraceae	g__Roseburia	s__uncultured_bacterium
OTU214	16	9	19	6	4	6	25	4	19	23	587	28	22	36	16	k__Bacteria	p__Firmicutes	c__Clostridia	o__Clostridia_vadinBB60_group	f__Clostridia_vadinBB60_group	g__Clostridia_vadinBB60_group
OTU101	48	20	23	46	32	296	23	24	25	28	57	21	19	18	16	k__Bacteria	p__Firmicutes	c__Clostridia	o__Lachnospirales	f__Lachnospiraceae
OTU118	32	133	66	7	2	8	25	1	0	4	1	270	0	36	177	k__Bacteria	p__Firmicutes	c__Clostridia	o__Lachnospirales	f__Lachnospiraceae	g__Lachnospiraceae_NK4A136_group	s__uncultured_bacterium
OTU112	0	0	0	0	0	6	6	3	2	7	60	330	145	49	185	k__Bacteria	p__Firmicutes	c__Clostridia	o__Lachnospirales	f__Lachnospiraceae	g__Roseburia
OTU194	64	36	37	28	12	80	45	70	63	43	8	32	32	31	65	k__Bacteria	p__Firmicutes	c__Clostridia	o__Clostridia_UCG-014	f__Clostridia_UCG-014	g__Clostridia_UCG-014	s__unidentified
OTU220	12	2	3	1	0	98	54	46	40	267	10	12	66	13	59	k__Bacteria	p__Firmicutes	c__Bacilli	o__Lactobacillales	f__Lactobacillaceae	g__Lactobacillus	s__Lactobacillus_reuteri
OTU44	47	16	50	78	65	86	25	33	33	11	93	57	31	37	17	k__Bacteria	p__Firmicutes	c__Clostridia	o__Lachnospirales	f__Lachnospiraceae	g__Tuzzerella	s__uncultured_bacterium
OTU125	1	2	127	107	77	4	56	4	29	62	136	20	51	15	13	k__Bacteria	p__Firmicutes	c__Clostridia	o__Lachnospirales	f__Lachnospiraceae
OTU73	91	34	36	86	67	69	20	20	38	24	45	41	20	31	50	k__Bacteria	p__Firmicutes	c__Clostridia	o__Oscillospirales	f__Oscillospiraceae
OTU69	17	16	12	16	11	38	37	79	64	36	93	69	66	58	44	k__Bacteria	p__Bacteroidota	c__Bacteroidia	o__Bacteroidales	f__Tannerellaceae	g__Parabacteroides	s__Parabacteroides_johnsonii
OTU96	73	23	56	86	67	45	11	16	19	18	40	47	35	48	69	k__Bacteria	p__Firmicutes	c__Clostridia	o__Lachnospirales	f__Lachnospiraceae
OTU111	4	0	10	10	9	3	1	4	3	7	445	69	9	35	100	k__Bacteria	p__Firmicutes	c__Clostridia	o__Lachnospirales	f__Lachnospiraceae	g__Lachnospiraceae_NK4A136_group	s__uncultured_bacterium
OTU106	60	36	17	31	32	76	34	88	57	78	17	18	14	24	38	k__Bacteria	p__Firmicutes	c__Clostridia	o__Clostridia_UCG-014	f__Clostridia_UCG-014	g__Clostridia_UCG-014	s__uncultured_bacterium
OTU131	25	18	31	65	35	55	34	32	33	26	118	63	16	26	41	k__Bacteria	p__Firmicutes	c__Clostridia	o__Oscillospirales	f__Oscillospiraceae	g__Oscillibacter
OTU147	1	28	13	74	505	4	1	1	0	3	10	0	2	3	5	k__Bacteria	p__Firmicutes	c__Clostridia	o__Lachnospirales	f__Lachnospiraceae	g__Lachnospiraceae_NK4A136_group	s__uncultured_bacterium
OTU152	46	23	30	51	66	14	25	21	34	19	58	85	52	39	59	k__Bacteria	p__Firmicutes	c__Clostridia	o__Oscillospirales	f__Butyricicoccaceae	g__UCG-009
OTU233	0	0	0	2	0	1	0	104	166	25	19	160	11	36	94	k__Bacteria	p__Firmicutes	c__Clostridia	o__Lachnospirales	f__Lachnospiraceae	g__Lachnospiraceae_NK4A136_group	s__uncultured_bacterium
OTU169	39	21	29	85	75	23	23	14	32	45	90	51	37	13	23	k__Bacteria	p__Firmicutes	c__Clostridia	o__Oscillospirales	f__Ruminococcaceae	g__Incertae_Sedis	s__Acutalibacter_muris
OTU209	9	28	14	7	11	3	155	49	22	29	92	37	30	96	27	k__Bacteria	p__Proteobacteria	c__Alphaproteobacteria	o__Rhodospirillales	f__uncultured	g__uncultured	s__gut_metagenome
OTU203	35	13	22	94	72	74	48	15	24	42	47	27	19	13	19	k__Bacteria	p__Firmicutes	c__Clostridia	o__Lachnospirales	f__Lachnospiraceae	g__Lachnospiraceae_FCS020_group
OTU187	63	13	25	19	15	26	19	84	92	18	65	48	15	59	16	k__Bacteria	p__Bacteroidota	c__Bacteroidia	o__Bacteroidales	f__Bacteroidaceae	g__Bacteroides
OTU206	10	7	5	70	46	51	40	15	44	58	56	35	38	14	40	k__Bacteria	p__Firmicutes	c__Clostridia	o__Lachnospirales	f__Lachnospiraceae	g__uncultured	s__Clostridium_sp.
OTU172	61	71	37	13	36	16	18	48	26	20	47	32	39	34	29	k__Bacteria	p__Bacteroidota	c__Bacteroidia	o__Bacteroidales	f__Muribaculaceae	g__Muribaculaceae	s__uncultured_bacterium
OTU150	29	10	30	7	19	8	39	22	19	78	79	17	59	40	105	k__Bacteria	p__Cyanobacteria	c__Vampirivibrionia	o__Gastranaerophilales	f__Gastranaerophilales	g__Gastranaerophilales	s__uncultured_bacterium
OTU176	69	0	13	30	33	1	31	14	52	52	59	94	9	13	79	k__Bacteria	p__Firmicutes	c__Clostridia	o__Lachnospirales	f__Lachnospiraceae	g__Lachnospiraceae_NK4A136_group
OTU149	19	13	29	122	93	44	17	4	12	24	67	15	9	19	17	k__Bacteria	p__Firmicutes	c__Clostridia	o__Lachnospirales	f__Lachnospiraceae	g__Lachnospiraceae_NK4A136_group
OTU250	1	7	8	84	123	1	7	1	0	4	196	45	6	17	30	k__Bacteria	p__Firmicutes	c__Clostridia	o__Lachnospirales	f__Lachnospiraceae	g__Lachnospiraceae_NK4A136_group	s__uncultured_bacterium
OTU153	44	26	42	76	38	42	21	14	28	26	27	30	20	24	28	k__Bacteria	p__Firmicutes	c__Clostridia	o__Lachnospirales	f__Lachnospiraceae
OTU165	70	65	44	34	25	12	31	22	50	32	10	21	21	15	21	k__Bacteria	p__Firmicutes	c__Clostridia	o__Clostridia_UCG-014	f__Clostridia_UCG-014	g__Clostridia_UCG-014
OTU78	33	38	34	40	40	46	23	18	26	38	30	32	14	15	37	k__Bacteria	p__Firmicutes	c__Clostridia	o__Oscillospirales	f__Ruminococcaceae	g__Incertae_Sedis
OTU110	2	11	0	18	5	4	0	1	1	2	472	3	0	4	2	k__Bacteria	p__Firmicutes	c__Clostridia	o__Lachnospirales	f__Lachnospiraceae	g__Lachnospiraceae_UCG-001	s__uncultured_bacterium
OTU257	24	23	26	35	22	33	44	38	22	15	37	40	30	54	25	k__Bacteria	p__Bacteroidota	c__Bacteroidia	o__Bacteroidales	f__Rikenellaceae	g__Alistipes	s__uncultured_bacterium
OTU122	46	3	52	9	12	86	22	22	46	22	28	43	27	5	28	k__Bacteria	p__Firmicutes	c__Clostridia	o__Lachnospirales	f__Lachnospiraceae
OTU285	14	12	47	52	37	41	8	26	25	22	88	28	14	7	23	k__Bacteria	p__Firmicutes	c__Clostridia	o__Oscillospirales	f__Oscillospiraceae
OTU133	0	1	3	221	137	2	24	3	1	22	0	2	1	1	0	k__Bacteria	p__Firmicutes	c__Clostridia	o__Lachnospirales	f__Lachnospiraceae
OTU81	11	14	18	126	96	25	19	4	5	17	30	18	11	8	12	k__Bacteria	p__Firmicutes	c__Clostridia	o__Oscillospirales	f__Ruminococcaceae	g__UBA1819	s__uncultured_bacterium
OTU202	38	11	19	41	41	39	16	18	27	48	69	21	17	11	14	k__Bacteria	p__Firmicutes	c__Clostridia	o__Oscillospirales	f__Oscillospiraceae	g__uncultured
OTU279	18	23	15	36	30	16	39	5	8	7	110	23	28	60	22	k__Bacteria	p__Bacteroidota	c__Bacteroidia	o__Bacteroidales	f__Tannerellaceae	g__Parabacteroides	s__Parabacteroides_goldsteinii
OTU244	17	58	8	57	38	27	17	6	27	19	77	24	7	6	22	k__Bacteria	p__Firmicutes	c__Clostridia	o__Lachnospirales	f__Lachnospiraceae	g__Lachnospiraceae_NK4A136_group
OTU135	9	7	46	40	20	2	26	22	14	34	119	29	19	14	34	k__Bacteria	p__Firmicutes	c__Clostridia	o__Lachnospirales	f__Lachnospiraceae	g__uncultured	s__uncultured_bacterium
OTU191	34	2	67	5	1	41	74	40	26	41	0	31	58	3	14	k__Bacteria	p__Firmicutes	c__Clostridia	o__Lachnospirales	f__Lachnospiraceae	g__uncultured
OTU175	24	11	29	56	56	15	9	18	21	16	62	44	17	16	38	k__Bacteria	p__Firmicutes	c__Clostridia	o__Oscillospirales	f__Oscillospiraceae	g__Intestinimonas	s__uncultured_bacterium
OTU113	0	0	0	0	0	0	3	0	0	5	5	171	110	50	106	k__Bacteria	p__Firmicutes	c__Clostridia	o__Lachnospirales	f__Lachnospiraceae
OTU76	34	19	20	50	36	40	20	13	16	43	26	51	14	11	32	k__Bacteria	p__Firmicutes	c__Clostridia	o__Lachnospirales	f__Lachnospiraceae	g__Roseburia
OTU201	29	12	14	98	65	40	17	10	14	19	29	22	13	13	22	k__Bacteria	p__Firmicutes	c__Clostridia	o__Lachnospirales	f__Lachnospiraceae	g__Lachnospiraceae_UCG-006	s__uncultured_bacterium
OTU182	20	6	18	57	24	29	15	13	41	14	89	45	18	11	20	k__Bacteria	p__Firmicutes	c__Clostridia	o__Oscillospirales	f__Ruminococcaceae	g__uncultured	s__uncultured_bacterium
OTU159	25	18	29	47	47	18	9	17	24	19	70	17	19	7	26	k__Bacteria	p__Firmicutes	c__Clostridia	o__Oscillospirales	f__Ruminococcaceae	g__Anaerotruncus	s__uncultured_bacterium
OTU256	35	5	13	12	6	6	9	19	51	10	33	126	13	32	54	k__Bacteria	p__Firmicutes	c__Clostridia	o__Lachnospirales	f__Lachnospiraceae	g__Blautia	s__unidentified
OTU293	22	22	25	9	13	2	12	9	16	28	30	83	43	34	66	k__Bacteria	p__Firmicutes	c__Clostridia	o__Oscillospirales	f__Oscillospiraceae
OTU157	20	10	12	73	44	16	11	7	7	5	16	19	43	5	99	k__Bacteria	p__Firmicutes	c__Clostridia	o__Lachnospirales	f__Lachnospiraceae
OTU102	35	13	14	33	34	15	17	8	14	13	79	41	9	24	35	k__Bacteria	p__Firmicutes	c__Clostridia	o__Peptococcales	f__Peptococcaceae	g__Peptococcus	s__uncultured_bacterium
OTU178	48	12	18	14	16	43	28	9	20	22	6	14	8	25	95	k__Bacteria	p__Firmicutes	c__Clostridia	o__Clostridia_UCG-014	f__Clostridia_UCG-014	g__Clostridia_UCG-014
OTU287	129	30	17	30	30	0	10	17	5	17	0	6	1	28	30	k__Bacteria	p__Firmicutes	c__Clostridia	o__Clostridia_UCG-014	f__Clostridia_UCG-014	g__Clostridia_UCG-014
OTU183	47	5	21	45	44	46	12	11	16	14	36	23	6	6	27	k__Bacteria	p__Firmicutes	c__Clostridia	o__Lachnospirales	f__Lachnospiraceae
OTU276	0	60	1	26	19	29	4	23	5	32	43	56	2	8	49	k__Bacteria	p__Firmicutes	c__Clostridia	o__Lachnospirales	f__Lachnospiraceae
OTU130	0	6	7	8	4	4	83	2	5	3	259	6	2	1	7	k__Bacteria	p__Firmicutes	c__Clostridia	o__Lachnospirales	f__Lachnospiraceae
OTU103	12	4	23	78	31	8	14	5	5	10	94	24	25	9	29	k__Bacteria	p__Firmicutes	c__Clostridia	o__Lachnospirales	f__Lachnospiraceae	g__uncultured	s__uncultured_bacterium
OTU167	19	3	63	108	66	2	13	11	3	14	12	12	11	10	11	k__Bacteria	p__Firmicutes	c__Clostridia	o__Lachnospirales	f__Lachnospiraceae	g__Blautia	s__Lachnospiraceae_bacterium
OTU196	24	23	18	8	9	59	14	39	40	24	24	24	13	19	9	k__Bacteria	p__Firmicutes	c__Clostridia	o__Oscillospirales	f__Butyricicoccaceae	g__UCG-009	s__uncultured_bacterium
OTU224	19	4	10	3	6	13	66	44	79	67	6	9	7	13	6	k__Bacteria	p__Proteobacteria	c__Gammaproteobacteria	o__Burkholderiales	f__Sutterellaceae	g__Parasutterella
OTU136	5	9	26	84	51	0	6	1	8	34	74	5	14	6	31	k__Bacteria	p__Firmicutes	c__Clostridia	o__Lachnospirales	f__Lachnospiraceae	g__Lachnospiraceae_NK4A136_group	s__uncultured_bacterium
OTU126	37	0	23	0	0	0	0	0	0	0	113	79	36	1	65	k__Bacteria	p__Firmicutes	c__Clostridia	o__Lachnospirales	f__Lachnospiraceae	g__uncultured	s__uncultured_bacterium
OTU212	22	52	2	0	1	26	24	40	55	43	5	12	10	16	9	k__Bacteria	p__Firmicutes	c__Clostridia	o__Clostridia_UCG-014	f__Clostridia_UCG-014	g__Clostridia_UCG-014	s__uncultured_bacterium
OTU269	58	35	21	26	28	12	19	8	30	18	4	23	11	32	10	k__Bacteria	p__Firmicutes	c__Clostridia	o__Peptostreptococcales-Tissierellales	f__Anaerovoracaceae	g__[Eubacterium]_nodatum_group
OTU137	45	37	27	19	13	17	10	24	12	14	18	22	22	27	22	k__Bacteria	p__Firmicutes	c__Clostridia	o__uncultured	f__uncultured	g__uncultured	s__uncultured_organism
OTU271	12	3	8	1	2	26	19	17	3	41	16	22	71	53	37	k__Bacteria	p__Actinobacteriota	c__Actinobacteria	o__Bifidobacteriales	f__Bifidobacteriaceae	g__Bifidobacterium	s__Bifidobacterium_pseudolongum
OTU144	1	3	4	45	29	3	12	15	13	20	23	82	12	9	57	k__Bacteria	p__Firmicutes	c__Clostridia	o__Lachnospirales	f__Lachnospiraceae	g__Lachnospiraceae_NK4A136_group	s__Lachnospiraceae_bacterium
OTU221	11	17	26	14	17	11	44	28	33	15	38	26	19	15	16	k__Bacteria	p__Bacteroidota	c__Bacteroidia	o__Bacteroidales	f__Rikenellaceae	g__Alistipes
OTU248	50	19	17	48	24	16	14	7	25	19	24	16	11	12	25	k__Bacteria	p__Firmicutes	c__Clostridia	o__Oscillospirales	f__Ruminococcaceae	g__Incertae_Sedis	s__uncultured_bacterium
OTU289	33	34	10	14	21	14	14	20	14	36	3	14	22	30	33	k__Bacteria	p__Firmicutes	c__Clostridia	o__Clostridia_UCG-014	f__Clostridia_UCG-014	g__Clostridia_UCG-014	s__unidentified
OTU158	1	0	0	79	14	5	1	1	0	0	171	15	20	12	10	k__Bacteria	p__Firmicutes	c__Clostridia	o__Lachnospirales	f__Lachnospiraceae	g__uncultured
OTU123	27	14	16	12	9	46	11	41	40	10	10	28	16	18	12	k__Bacteria	p__Firmicutes	c__Clostridia	o__Peptostreptococcales-Tissierellales	f__Anaerovoracaceae	g__Anaerovorax	s__uncultured_bacterium
OTU173	28	6	29	14	13	19	15	17	25	6	62	22	16	11	24	k__Bacteria	p__Firmicutes	c__Clostridia	o__Oscillospirales	f__Oscillospiraceae	g__uncultured	s__uncultured_bacterium
OTU273	12	54	15	12	14	6	17	8	14	10	19	35	23	31	36	k__Bacteria	p__Firmicutes	c__Clostridia	o__Oscillospirales	f__UCG-010	g__UCG-010
OTU138	19	34	16	31	39	28	3	25	9	12	8	13	19	21	21	k__Bacteria	p__Actinobacteriota	c__Coriobacteriia	o__Coriobacteriales	f__Eggerthellaceae	g__Enterorhabdus	s__uncultured_bacterium
OTU189	10	16	12	8	12	14	31	23	18	7	24	27	38	40	23	k__Bacteria	p__Bacteroidota	c__Bacteroidia	o__Bacteroidales	f__Marinifilaceae	g__Butyricimonas	s__uncultured_bacterium
OTU235	6	5	23	10	8	13	46	30	17	11	41	22	28	37	16	k__Bacteria	p__Bacteroidota	c__Bacteroidia	o__Bacteroidales	f__Marinifilaceae	g__Butyricimonas
OTU64	16	7	13	10	10	12	18	24	39	17	25	16	27	27	45	k__Bacteria	p__Bacteroidota	c__Bacteroidia	o__Bacteroidales	f__Muribaculaceae	g__Muribaculaceae	s__uncultured_bacterium
OTU261	1	0	2	5	2	21	39	12	6	56	8	65	29	14	42	k__Bacteria	p__Firmicutes	c__Clostridia	o__Lachnospirales	f__Lachnospiraceae
OTU255	21	10	14	4	6	17	11	16	17	26	24	59	35	13	33	k__Bacteria	p__Firmicutes	c__Clostridia	o__Lachnospirales	f__Lachnospiraceae	g__Acetatifactor	s__uncultured_bacterium
OTU246	16	11	19	30	23	19	4	11	16	8	63	32	7	9	21	k__Bacteria	p__Firmicutes	c__Clostridia	o__Oscillospirales	f__Oscillospiraceae	g__uncultured	s__uncultured_bacterium
OTU116	67	2	17	0	1	1	7	2	6	6	80	20	37	5	45	k__Bacteria	p__Firmicutes	c__Clostridia	o__Lachnospirales	f__Lachnospiraceae	g__Lachnospiraceae_NK4A136_group
OTU205	16	16	29	10	10	51	8	19	37	28	17	7	9	1	12	k__Bacteria	p__Firmicutes	c__Clostridia	o__Lachnospirales	f__Lachnospiraceae	g__Roseburia	s__uncultured_bacterium
OTU163	0	58	6	19	8	0	31	23	36	23	17	32	3	14	9	k__Bacteria	p__Firmicutes	c__Clostridia	o__Oscillospirales	f__UCG-010	g__UCG-010
OTU298	9	8	21	18	22	26	8	5	23	8	74	25	16	9	15	k__Bacteria	p__Firmicutes	c__Clostridia	o__Oscillospirales	f__Oscillospiraceae	g__Oscillibacter	s__uncultured_bacterium
OTU115	3	5	35	21	16	12	6	17	17	44	44	25	11	6	25	k__Bacteria	p__Firmicutes	c__Clostridia	o__Oscillospirales	f__Oscillospiraceae	g__uncultured	s__unidentified
OTU186	1	10	6	71	30	5	12	11	15	22	55	8	12	6	14	k__Bacteria	p__Firmicutes	c__Clostridia	o__Lachnospirales	f__Lachnospiraceae	g__Lachnospiraceae_NK4A136_group	s__Lachnospiraceae_bacterium
OTU120	12	11	29	16	10	16	7	24	26	4	16	39	7	19	29	k__Bacteria	p__Firmicutes	c__Clostridia	o__Oscillospirales	f__Oscillospiraceae	g__uncultured	s__uncultured_bacterium
OTU164	14	4	12	40	18	13	13	6	10	11	75	22	11	12	15	k__Bacteria	p__Firmicutes	c__Clostridia	o__Lachnospirales	f__Lachnospiraceae	g__Lachnospiraceae_NK4A136_group	s__uncultured_bacterium
OTU262	21	1	64	0	1	1	12	9	14	3	10	79	6	19	38	k__Bacteria	p__Firmicutes	c__Clostridia	o__Lachnospirales	f__Lachnospiraceae	g__uncultured	s__unidentified
OTU193	1	2	3	2	2	103	8	16	16	7	9	15	4	34	16	k__Bacteria	p__Firmicutes	c__Clostridia	o__Lachnospirales	f__Lachnospiraceae
OTU211	2	0	0	2	0	69	36	12	30	43	4	49	1	12	9	k__Bacteria	p__Firmicutes	c__Clostridia	o__Lachnospirales	f__Lachnospiraceae
OTU129	12	13	11	52	36	26	5	3	7	6	14	17	6	4	45	k__Bacteria	p__Firmicutes	c__Clostridia
OTU264	18	8	24	28	20	3	36	5	0	17	17	19	25	19	19	k__Bacteria	p__Bacteroidota	c__Bacteroidia	o__Bacteroidales	f__Muribaculaceae	g__Muribaculaceae	s__uncultured_bacterium
OTU132	4	25	17	16	14	10	7	32	43	29	22	15	1	7	8	k__Bacteria	p__Firmicutes	c__Clostridia	o__Lachnospirales	f__Lachnospiraceae
OTU188	27	22	18	13	18	14	6	12	11	14	17	24	16	12	21	k__Bacteria	p__Firmicutes	c__Clostridia	o__Peptostreptococcales-Tissierellales	f__Anaerovoracaceae	g__Family_XIII_AD3011_group	s__uncultured_bacterium
OTU140	19	12	5	37	31	9	2	2	2	5	80	15	21	6	14	k__Bacteria	p__Firmicutes	c__Clostridia	o__Lachnospirales	f__Lachnospiraceae
OTU216	8	5	8	11	3	20	16	21	21	18	12	48	24	12	25	k__Bacteria	p__Firmicutes	c__Clostridia	o__Lachnospirales	f__Lachnospiraceae	g__Lachnospiraceae_NK4B4_group	s__uncultured_bacterium
OTU292	0	121	33	9	0	27	0	2	1	10	0	0	0	0	0	k__Bacteria	p__Firmicutes	c__Clostridia	o__Clostridia_UCG-014	f__Clostridia_UCG-014	g__Clostridia_UCG-014
OTU174	22	29	10	33	21	31	11	7	12	9	6	9	5	1	8	k__Bacteria	p__Firmicutes	c__Clostridia	o__Lachnospirales	f__Lachnospiraceae	g__A2	s__uncultured_bacterium
OTU267	9	0	33	2	1	27	15	4	2	2	37	19	43	27	14	k__Bacteria	p__Firmicutes	c__Clostridia	o__Lachnospirales	f__Lachnospiraceae	g__Lachnospiraceae_UCG-001	s__unidentified
OTU236	10	3	14	35	24	24	11	10	7	18	20	16	11	7	13	k__Bacteria	p__Firmicutes	c__Clostridia	o__Lachnospirales	f__Lachnospiraceae
OTU168	13	11	8	18	17	32	3	9	14	9	18	25	18	3	15	k__Bacteria	p__Firmicutes	c__Clostridia	o__Oscillospirales	f__Oscillospiraceae	g__uncultured
OTU286	48	1	15	5	9	14	5	27	58	33	0	0	0	0	1	k__Bacteria	p__Firmicutes	c__Clostridia	o__Lachnospirales	f__Lachnospiraceae
OTU117	0	12	50	6	10	27	11	4	2	18	16	6	22	4	30	k__Bacteria	p__Firmicutes	c__Clostridia	o__Lachnospirales	f__Lachnospiraceae
OTU263	4	3	3	4	17	3	5	13	3	7	0	54	43	12	55	k__Bacteria	p__Firmicutes	c__Clostridia	o__Lachnospirales	f__Lachnospiraceae
OTU229	9	13	13	3	1	13	29	10	19	3	35	25	12	27	3	k__Bacteria	p__Firmicutes	c__Clostridia	o__Oscillospirales	f__UCG-010	g__UCG-010
OTU231	19	6	6	16	10	16	6	18	17	23	26	16	13	7	9	k__Bacteria	p__Firmicutes	c__Clostridia	o__Oscillospirales	f__Oscillospiraceae	g__Colidextribacter
OTU247	20	11	8	23	14	16	10	10	14	9	21	19	11	8	13	k__Bacteria	p__Firmicutes	c__Clostridia	o__Lachnospirales	f__Lachnospiraceae
OTU230	6	35	7	7	3	12	26	16	14	12	7	16	14	15	16	k__Bacteria	p__Firmicutes	c__Clostridia	o__Oscillospirales	f__[Eubacterium]_coprostanoligenes_group	g__[Eubacterium]_coprostanoligenes_group
OTU270	15	12	12	11	11	0	32	6	12	12	8	18	24	20	10	k__Bacteria	p__Firmicutes	c__Clostridia	o__Oscillospirales	f__UCG-010	g__UCG-010	s__uncultured_organism
OTU124	11	11	20	17	6	26	5	19	12	25	1	11	14	0	8	k__Bacteria	p__Firmicutes	c__Clostridia	o__Lachnospirales	f__Lachnospiraceae	g__Lachnospiraceae_NK4A136_group	s__uncultured_bacterium
OTU114	31	23	12	9	11	2	13	11	16	9	6	7	12	10	13	k__Bacteria	p__Firmicutes	c__Clostridia	o__Christensenellales	f__Christensenellaceae	g__Christensenellaceae_R-7_group
OTU141	3	12	2	55	41	8	1	2	0	2	60	1	1	2	3	k__Bacteria	p__Firmicutes	c__Clostridia	o__Lachnospirales	f__Lachnospiraceae	g__Lachnospiraceae_NK4A136_group
OTU266	60	1	0	2	5	0	3	4	0	3	0	8	22	86	6	k__Bacteria	p__Firmicutes	c__Clostridia	o__Clostridia_UCG-014	f__Clostridia_UCG-014	g__Clostridia_UCG-014	s__unidentified
OTU160	2	2	28	52	40	5	6	0	8	5	1	9	6	14	7	k__Bacteria	p__Firmicutes	c__Clostridia	o__Lachnospirales	f__Lachnospiraceae	g__Lachnospiraceae_NK4A136_group
OTU184	20	10	17	15	12	5	16	8	6	8	10	20	13	19	15	k__Bacteria	p__Firmicutes	c__Clostridia	o__Oscillospirales	f__Ruminococcaceae	g__Negativibacillus	s__unidentified
OTU155	32	10	15	33	23	15	11	3	4	4	4	12	3	5	10	k__Bacteria	p__Firmicutes	c__Clostridia	o__Lachnospirales	f__Lachnospiraceae
OTU245	9	4	20	38	25	11	9	8	10	10	32	4	2	1	4	k__Bacteria	p__Firmicutes	c__Clostridia	o__Lachnospirales	f__Lachnospiraceae	g__uncultured	s__unidentified
OTU179	10	21	5	1	83	1	6	4	12	11	5	18	5	5	9	k__Bacteria	p__Firmicutes	c__Bacilli	o__Erysipelotrichales	f__Erysipelotrichaceae	g__uncultured	s__unidentified
OTU166	12	7	13	34	22	17	7	1	5	10	26	15	8	5	11	k__Bacteria	p__Firmicutes	c__Clostridia	o__Oscillospirales	f__Oscillospiraceae
OTU242	16	6	3	0	0	0	59	20	7	38	29	1	1	0	1	k__Bacteria	p__Firmicutes	c__Clostridia	o__Lachnospirales	f__Lachnospiraceae
OTU284	24	5	25	6	5	22	6	9	13	10	10	11	16	4	7	k__Bacteria	p__Firmicutes	c__Clostridia	o__Lachnospirales	f__Lachnospiraceae	g__uncultured	s__uncultured_bacterium
OTU268	13	6	8	9	7	4	14	12	15	12	17	21	13	9	9	k__Bacteria	p__Firmicutes	c__Clostridia	o__Christensenellales	f__Christensenellaceae	g__uncultured	s__uncultured_bacterium
OTU207	19	2	14	11	5	24	23	7	20	15	10	5	3	3	3	k__Bacteria	p__Firmicutes	c__Clostridia	o__Oscillospirales	f__Butyricicoccaceae	g__Butyricicoccus	s__uncultured_bacterium
OTU227	8	4	8	6	6	16	14	2	9	4	70	8	5	6	3	k__Bacteria	p__Firmicutes	c__Clostridia	o__Clostridia_vadinBB60_group	f__Clostridia_vadinBB60_group	g__Clostridia_vadinBB60_group	s__uncultured_bacterium
OTU143	3	1	2	47	26	6	6	3	2	4	7	17	7	8	29	k__Bacteria	p__Firmicutes	c__Clostridia	o__Lachnospirales	f__Lachnospiraceae	g__Roseburia
OTU218	2	5	19	1	3	2	31	11	6	18	8	22	20	5	13	k__Bacteria	p__Firmicutes	c__Clostridia	o__Lachnospirales	f__Lachnospiraceae	g__Lachnospiraceae_NK4A136_group
OTU146	0	0	1	94	60	0	0	0	0	0	0	0	1	0	0	k__Bacteria	p__Firmicutes	c__Clostridia	o__Lachnospirales	f__Lachnospiraceae
OTU148	12	1	16	60	16	0	2	5	4	1	0	0	7	8	18	k__Bacteria	p__Firmicutes	c__Clostridia	o__Clostridia_UCG-014	f__Clostridia_UCG-014	g__Clostridia_UCG-014	s__uncultured_bacterium
OTU139	3	5	10	28	30	0	5	0	0	8	40	14	1	5	11	k__Bacteria	p__Firmicutes	c__Clostridia	o__Lachnospirales	f__Lachnospiraceae	g__uncultured	s__uncultured_bacterium
OTU204	5	1	21	18	7	5	3	4	2	3	42	23	11	11	12	k__Bacteria	p__Firmicutes	c__Clostridia	o__Oscillospirales	f__Oscillospiraceae	g__uncultured	s__uncultured_bacterium
OTU290	23	0	5	0	0	2	0	5	27	18	1	11	14	5	43	k__Bacteria	p__Firmicutes	c__Bacilli	o__Lactobacillales	f__Lactobacillaceae	g__Lactobacillus	s__Lactobacillus_intestinalis
OTU278	20	12	7	6	6	4	6	18	24	8	8	6	10	8	4	k__Bacteria	p__Firmicutes	c__Clostridia	o__Clostridia_UCG-014	f__Clostridia_UCG-014	g__Clostridia_UCG-014	s__unidentified
OTU258	16	14	6	15	9	6	6	5	12	2	8	8	9	7	32	k__Bacteria	p__Firmicutes	c__Clostridia	o__Clostridia_UCG-014	f__Clostridia_UCG-014	g__Clostridia_UCG-014
OTU119	11	7	9	6	12	11	14	8	4	12	6	9	12	23	10	k__Bacteria	p__Firmicutes	c__Clostridia	o__Oscillospirales	f__UCG-010	g__UCG-010
OTU128	21	3	5	0	1	26	9	12	16	7	13	17	3	3	8	k__Bacteria	p__Firmicutes	c__Clostridia	o__Lachnospirales	f__Lachnospiraceae
OTU180	13	5	8	10	22	23	6	5	7	4	14	11	5	7	9	k__Bacteria	p__Firmicutes	c__Clostridia	o__Lachnospirales	f__Lachnospiraceae
OTU259	9	5	21	23	20	1	0	2	0	2	20	23	0	5	12	k__Bacteria	p__Firmicutes	c__Clostridia	o__Lachnospirales	f__Lachnospiraceae
OTU210	0	0	0	0	1	0	2	2	99	10	1	3	3	5	13	k__Bacteria	p__Firmicutes	c__Bacilli	o__Erysipelotrichales	f__Erysipelatoclostridiaceae	g__Erysipelatoclostridium
OTU162	20	3	2	12	9	7	4	18	5	7	1	12	13	11	12	k__Bacteria	p__Firmicutes	c__Clostridia	o__Clostridia_UCG-014	f__Clostridia_UCG-014	g__Clostridia_UCG-014
OTU222	12	4	7	8	13	3	6	10	14	10	31	6	3	2	3	k__Bacteria	p__Firmicutes	c__Clostridia	o__Lachnospirales	f__Lachnospiraceae	g__uncultured
OTU142	3	0	5	35	21	0	2	0	0	0	75	0	1	2	2	k__Bacteria	p__Firmicutes	c__Clostridia	o__Oscillospirales	f__Ruminococcaceae	g__[Eubacterium]_siraeum_group	s__uncultured_bacterium
OTU154	0	1	1	42	41	4	2	0	1	3	6	3	4	0	18	k__Bacteria	p__Firmicutes	c__Clostridia	o__Lachnospirales	f__Lachnospiraceae	g__Roseburia	s__uncultured_bacterium
OTU197	2	1	2	0	0	20	4	4	3	1	13	26	38	6	25	k__Bacteria	p__Firmicutes	c__Clostridia	o__Lachnospirales	f__Lachnospiraceae	g__Roseburia	s__uncultured_bacterium
OTU277	4	4	15	20	23	0	3	5	1	6	28	6	4	3	8	k__Bacteria	p__Firmicutes	c__Clostridia	o__Lachnospirales	f__Lachnospiraceae
OTU151	25	19	9	19	8	1	3	13	6	3	3	4	2	1	1	k__Bacteria	p__Firmicutes	c__Clostridia	o__Monoglobales	f__Monoglobaceae	g__Monoglobus	s__unidentified
OTU181	3	7	3	29	20	7	1	2	5	4	10	12	4	6	4	k__Bacteria	p__Firmicutes	c__Clostridia	o__Lachnospirales	f__Lachnospiraceae	g__GCA-900066575	s__uncultured_bacterium
OTU121	16	0	19	0	0	0	44	0	0	0	20	10	2	1	6	k__Bacteria	p__Firmicutes	c__Clostridia	o__Lachnospirales	f__Lachnospiraceae
OTU275	12	0	8	1	1	12	10	4	4	20	2	14	5	5	17	k__Bacteria	p__Firmicutes	c__Clostridia	o__Lachnospirales	f__Lachnospiraceae
OTU281	11	0	13	0	0	0	0	0	0	0	0	10	15	44	35	k__Bacteria	p__Firmicutes	c__Clostridia	o__Lachnospirales	f__Lachnospiraceae
OTU223	4	0	4	8	3	1	0	5	1	5	27	26	16	6	19	k__Bacteria	p__Firmicutes	c__Clostridia	o__Lachnospirales	f__Lachnospiraceae	g__Acetatifactor	s__uncultured_bacterium
OTU228	6	1	8	4	4	11	6	4	4	7	54	8	2	3	1	k__Bacteria	p__Firmicutes	c__Clostridia	o__Clostridia_vadinBB60_group	f__Clostridia_vadinBB60_group	g__Clostridia_vadinBB60_group	s__unidentified
OTU252	2	0	0	0	0	1	1	0	2	0	95	21	3	0	4	k__Bacteria	p__Firmicutes	c__Clostridia	o__Clostridia_vadinBB60_group	f__Clostridia_vadinBB60_group	g__Clostridia_vadinBB60_group	s__uncultured_bacterium
OTU240	0	0	0	0	1	0	1	8	0	18	86	0	0	0	5	k__Bacteria	p__Firmicutes	c__Clostridia	o__Lachnospirales	f__Lachnospiraceae
OTU232	4	11	8	8	11	2	8	4	7	9	6	4	11	10	13	k__Bacteria	p__Firmicutes	c__Clostridia	o__Peptococcales	f__Peptococcaceae	g__uncultured	s__uncultured_bacterium
OTU296	15	12	5	6	7	9	3	5	5	7	5	5	5	2	6	k__Bacteria	p__Firmicutes	c__Clostridia	o__Oscillospirales	f__Oscillospiraceae
OTU198	3	3	6	17	11	21	6	2	3	3	2	1	6	0	14	k__Bacteria	p__Firmicutes	c__Clostridia	o__Lachnospirales	f__Lachnospiraceae	g__Roseburia	s__uncultured_bacterium
OTU199	0	0	0	0	0	24	5	14	7	23	0	2	6	9	1	k__Bacteria	p__Firmicutes	c__Clostridia	o__Lachnospirales	f__Lachnospiraceae
OTU127	1	0	11	13	9	8	2	7	5	2	14	6	10	3	6	k__Bacteria	p__Firmicutes	c__Clostridia	o__Oscillospirales	f__Oscillospiraceae	g__Oscillibacter
OTU238	5	1	6	10	5	6	3	4	10	2	34	5	3	1	3	k__Bacteria	p__Firmicutes	c__Clostridia	o__Oscillospirales	f__Ruminococcaceae
OTU219	12	11	12	5	6	2	6	5	3	3	2	7	12	6	6	k__Bacteria	p__Firmicutes	c__Clostridia	o__Oscillospirales	f__Ruminococcaceae	g__Candidatus_Soleaferrea	s__Ruminococcaceae_bacterium
OTU185	5	1	28	5	4	0	8	1	0	14	12	1	2	0	2	k__Bacteria	p__Bacteroidota	c__Bacteroidia	o__Bacteroidales	f__Rikenellaceae	g__Alistipes	s__uncultured_bacterium
OTU170	4	0	4	20	8	15	9	6	2	6	1	8	4	2	3	k__Bacteria	p__Firmicutes	c__Clostridia	o__Lachnospirales	f__Lachnospiraceae
OTU249	1	3	2	16	4	3	1	3	4	0	38	6	2	2	6	k__Bacteria	p__Firmicutes	c__Clostridia	o__Lachnospirales	f__Lachnospiraceae	g__Lachnospiraceae_NK4A136_group	s__uncultured_bacterium
OTU215	5	3	3	10	10	2	9	4	7	12	3	7	5	4	9	k__Bacteria	p__Actinobacteriota	c__Coriobacteriia	o__Coriobacteriales	f__Eggerthellaceae	g__Enterorhabdus	s__uncultured_bacterium
OTU272	0	17	5	0	0	0	2	9	27	6	0	3	1	8	4	k__Bacteria	p__Firmicutes	c__Clostridia	o__Oscillospirales	f__Oscillospiraceae	g__UCG-005
OTU134	2	3	2	22	7	4	1	2	1	4	8	8	6	3	7	k__Bacteria	p__Firmicutes	c__Clostridia	o__Oscillospirales	f__Butyricicoccaceae	g__Butyricicoccus	s__uncultured_bacterium
OTU93	6	4	4	10	2	8	6	2	12	6	7	2	5	7	3	k__Bacteria	p__Bacteroidota	c__Bacteroidia	o__Bacteroidales	f__Rikenellaceae	g__Alistipes	s__Alistipes_sp.
OTU145	5	0	17	13	10	0	0	6	0	12	0	1	2	0	12	k__Bacteria	p__Firmicutes	c__Clostridia	o__Lachnospirales	f__Lachnospiraceae
OTU251	1	0	4	10	10	0	15	3	0	9	8	3	11	3	3	k__Bacteria	p__Firmicutes	c__Clostridia	o__Lachnospirales	f__Lachnospiraceae	g__Tyzzerella	s__unidentified
OTU253	1	1	10	3	3	7	7	2	5	2	24	6	4	3	0	k__Bacteria	p__Firmicutes	c__Clostridia	o__Oscillospirales	f__Ruminococcaceae	g__uncultured	s__[Clostridium]_leptum
OTU237	22	0	2	9	7	4	2	1	3	7	1	2	2	2	2	k__Bacteria	p__Firmicutes	c__Clostridia	o__Clostridia_UCG-014	f__Clostridia_UCG-014	g__Clostridia_UCG-014
OTU190	0	2	0	21	8	16	0	7	9	7	0	0	0	0	0	k__Bacteria	p__Firmicutes	c__Clostridia	o__Lachnospirales	f__Lachnospiraceae	g__uncultured	s__unidentified
OTU208	2	7	4	6	11	14	1	4	5	0	4	6	2	3	4	k__Bacteria	p__Firmicutes	c__Clostridia	o__Lachnospirales	f__Lachnospiraceae
OTU225	4	2	3	8	8	4	5	3	4	5	13	2	3	1	1	k__Bacteria	p__Firmicutes	c__Clostridia	o__Lachnospirales	f__Lachnospiraceae
OTU200	6	0	1	2	0	26	1	0	8	8	3	3	0	0	3	k__Bacteria	p__Firmicutes	c__Clostridia	o__Lachnospirales	f__Lachnospiraceae
OTU234	3	2	5	3	2	16	2	0	2	2	5	3	2	3	5	k__Bacteria	p__Firmicutes	c__Clostridia	o__Oscillospirales	f__Oscillospiraceae	g__NK4A214_group
OTU294	9	10	2	2	1	1	3	4	0	10	1	7	3	1	4	k__Bacteria	p__Firmicutes	c__Clostridia	o__Peptostreptococcales-Tissierellales	f__Anaerovoracaceae	g__[Eubacterium]_nodatum_group	s__uncultured_bacterium
OTU171	18	0	12	10	7	0	0	0	0	0	0	2	1	0	0	k__Bacteria	p__Firmicutes	c__Clostridia	o__Lachnospirales	f__Lachnospiraceae
OTU265	0	0	0	0	0	1	0	4	8	2	0	14	13	13	1	k__Bacteria	p__Proteobacteria	c__Alphaproteobacteria	o__Rhodospirillales	f__uncultured	g__uncultured
OTU241	13	2	1	1	6	9	1	1	3	4	0	1	0	2	3	k__Bacteria	p__Firmicutes	c__Clostridia	o__Clostridia_UCG-014	f__Clostridia_UCG-014	g__Clostridia_UCG-014
OTU243	1	1	1	0	1	4	8	2	6	3	5	6	4	5	2	k__Bacteria	p__Firmicutes	c__Clostridia	o__Oscillospirales	f__Ruminococcaceae	g__uncultured
OTU195	3	5	2	2	1	12	4	2	2	0	1	2	3	2	3	k__Bacteria	p__Firmicutes	c__Clostridia	o__Oscillospirales	f__UCG-010	g__UCG-010	s__uncultured_organism
OTU280	10	1	2	0	0	2	5	0	7	5	3	2	0	2	3	k__Bacteria	p__Firmicutes	c__Clostridia	o__Clostridia_UCG-014	f__Clostridia_UCG-014	g__Clostridia_UCG-014
OTU260	1	1	0	3	2	4	0	2	0	3	1	5	5	3	4	k__Bacteria	p__Firmicutes	c__Clostridia	o__Oscillospirales	f__Oscillospiraceae
OTU161	0	3	1	9	6	1	0	0	0	1	3	1	0	1	5	k__Bacteria	p__Firmicutes	c__Clostridia	o__Lachnospirales	f__Lachnospiraceae	g__Roseburia
OTU274	4	2	2	2	1	1	2	2	2	2	2	0	0	3	5	k__Bacteria	p__Bacteroidota	c__Bacteroidia	o__Bacteroidales	f__Muribaculaceae	g__Muribaculaceae	s__uncultured_bacterium
OTU288	1	1	3	1	0	5	0	0	0	1	1	9	1	0	5	k__Bacteria	p__Firmicutes	c__Clostridia	o__Oscillospirales	f__Oscillospiraceae
OTU226	0	0	1	8	7	1	1	2	0	0	9	0	0	0	1	k__Bacteria	p__Firmicutes	c__Clostridia	o__Lachnospirales	f__Lachnospiraceae	g__uncultured	s__uncultured_bacterium
OTU213	0	0	0	5	2	0	4	2	3	1	0	2	0	3	0	k__Bacteria	p__Bacteroidota	c__Bacteroidia	o__Bacteroidales	f__Muribaculaceae	g__Muribaculaceae	s__uncultured_bacterium
OTU297	2	2	1	0	1	0	4	0	2	1	4	1	1	1	2	k__Bacteria	p__Firmicutes	c__Clostridia	o__Caldicoprobacterales	f__Caldicoprobacteraceae	g__Caldicoprobacter	s__uncultured_bacterium
OTU291	0	4	3	1	1	1	1	1	1	0	1	1	1	7	1	k__Bacteria	p__Firmicutes	c__Clostridia	o__Oscillospirales	f__Ruminococcaceae	g__uncultured
OTU282	6	0	2	0	0	0	0	1	1	0	0	0	0	0	0	k__Bacteria	p__Firmicutes	c__Clostridia	o__Clostridia_UCG-014	f__Clostridia_UCG-014	g__Clostridia_UCG-014
OTU217	0	0	1	0	0	0	1	0	0	0	0	0	1	0	2	k__Bacteria	p__Bacteroidota	c__Bacteroidia	o__Bacteroidales
OTU295	0	1	1	0	0	0	0	0	0	0	0	0	0	0	0	k__Bacteria	p__Bacteroidota	c__Bacteroidia	o__Bacteroidales	f__Muribaculaceae	g__Muribaculaceae	s__uncultured_bacterium
OTU192	0	0	0	0	0	1	0	0	0	0	0	0	0	0	0	k__Bacteria	p__Firmicutes	c__Clostridia	o__Lachnospirales	f__Lachnospiraceae	g__uncultured

## Sheet: Phylum_abundance
Taxon	Vehicle1	Vehicle2	Vehicle3	Vehicle4	Vehicle5	CCl4 1	CCl4 2	CCl4 3	CCl4 4	CCl4 5	Salecan1	Salecan2	Salecan3	Salecan4	Salecan5
Firmicutes	15903	16524	14427	17496	14329	20410	9487	13690	16448	15235	17514	16272	11871	12012	16806
Bacteroidota	11760	9675	12584	9511	12537	7389	18345	14708	11867	12645	10842	11642	16145	15156	10589
Proteobacteria	562	502	592	304	425	208	1099	500	489	800	346	1040	958	921	535
Desulfobacterota	372	218	448	1348	1152	624	138	331	284	248	680	352	208	197	391
Verrucomicrobiota	91	2168	982	271	620	265	120	1	88	67	7	36	34	898	688
Patescibacteria	784	334	386	227	271	240	313	261	319	347	40	137	157	269	245
Actinobacteriota	136	199	191	119	175	125	94	126	95	215	101	120	210	148	190
Deferribacterota	10	17	7	364	119	378	12	8	38	12	38	31	5	6	98
Cyanobacteria	29	10	30	7	19	8	39	22	19	78	79	17	59	40	105

## Sheet: Genus_abundance
Taxon	Vehicle1	Vehicle2	Vehicle3	Vehicle4	Vehicle5	CCl4 1	CCl4 2	CCl4 3	CCl4 4	CCl4 5	Salecan1	Salecan2	Salecan3	Salecan4	Salecan5
Muribaculaceae	7717	7238	7994	6747	8686	4079	10990	8383	6658	6885	4737	5937	7640	8753	5542
Lachnospiraceae_NK4A136_group	3918	2117	3529	6653	5273	7570	3313	2707	3695	4795	6550	4879	3189	2929	4338
Alloprevotella	2132	848	2503	1019	1874	1112	3349	3323	2562	3760	2095	2828	5535	2536	2520
Clostridia_UCG-014	3791	5277	2823	1449	1104	4264	1370	2902	4128	2067	282	1500	1047	1907	2522
f__Lachnospiraceae_Unclassified	1414	533	1463	2859	2111	2340	1060	859	1006	1394	2775	1754	1095	787	1700
Alistipes	672	513	961	687	738	568	1257	825	770	694	1115	874	874	904	811
f__Oscillospiraceae_Unclassified	889	301	680	1031	959	728	402	521	787	568	1837	896	484	533	858
[Eubacterium]_coprostanoligenes_group	113	1875	837	322	246	522	65	1430	1210	339	338	748	511	1755	785
[Eubacterium]_ruminantium_group	1260	1681	1358	18	530	601	82	513	445	199	62	1166	717	536	788
Bacteroides	400	301	303	378	356	807	768	687	817	409	1052	646	622	984	441
Parasutterella	553	474	578	297	414	204	944	447	459	769	254	989	915	812	507
Colidextribacter	494	284	449	743	678	697	269	426	511	496	774	647	534	332	705
Muribaculum	373	345	372	268	358	413	617	538	584	341	734	601	750	959	772
Akkermansia	91	2168	982	271	620	265	120	1	88	67	7	36	34	898	688
[Eubacterium]_fissicatena_group	362	1182	265	59	47	0	81	867	514	691	57	304	840	535	467
Ruminococcus	368	1235	517	186	360	83	396	145	345	325	288	504	329	431	666
Desulfovibrio	284	176	357	1190	1028	525	99	314	265	209	527	256	167	150	298
[Eubacterium]_xylanophilum_group	515	420	361	304	278	645	274	384	345	172	114	156	122	180	155
Candidatus_Saccharimonas	784	334	386	227	271	240	313	261	319	347	40	137	157	269	245
Roseburia	325	54	170	578	286	171	116	79	116	121	236	523	280	184	378
Rikenellaceae_RC9_gut_group	100	55	122	87	125	98	799	295	77	277	394	331	180	447	173
Lachnoclostridium	198	118	84	527	238	485	112	157	245	165	196	402	128	186	234
Lactobacillus	161	86	98	37	32	234	171	257	351	873	53	110	301	202	401
Faecalibaculum	208	251	262	125	150	40	34	99	55	175	44	185	641	143	501
Oscillibacter	87	63	172	190	149	355	112	169	233	133	565	225	113	112	172
Prevotellaceae_UCG-001	189	157	98	209	288	104	196	263	136	160	264	187	233	165	153
Romboutsia	66	31	60	38	32	43	278	474	606	605	17	61	235	36	195
Turicibacter	98	30	80	25	58	76	85	375	259	473	235	211	197	109	252
Clostridium_sensu_stricto_1	161	1	108	0	1	136	258	506	364	567	13	98	78	48	168
f__Ruminococcaceae_Unclassified	149	91	118	244	173	132	94	61	146	123	297	162	92	67	111
GCA-900066575	100	69	80	347	233	148	73	54	85	94	112	226	78	87	207
Butyricimonas	71	41	115	54	52	95	291	132	134	67	239	128	185	209	101
Clostridia_vadinBB60_group	32	14	35	16	14	34	46	10	34	34	806	65	32	45	24
ASF356	28	20	38	265	188	79	50	55	60	53	97	122	78	34	70
[Eubacterium]_siraeum_group	73	10	86	175	60	98	108	36	62	145	177	11	52	78	43
UCG-010	50	149	57	53	47	42	127	57	87	60	86	121	77	117	71
f__Peptococcaceae_Unclassified	82	53	72	135	122	143	35	40	53	68	117	111	52	34	79
Enterorhabdus	74	78	53	82	106	66	47	81	64	125	84	75	74	55	84
Bilophila	88	42	91	158	124	99	39	17	19	39	153	96	41	47	93
Mucispirillum	10	17	7	364	119	378	12	8	38	12	38	31	5	6	98
Parabacteroides	35	39	27	52	41	54	76	84	72	43	203	92	94	118	66
Marvinbryantia	149	32	20	39	36	41	31	39	32	29	90	147	46	68	221
f__uncultured_Unclassified	54	65	41	26	24	21	165	77	42	45	110	73	65	136	50
UCG-009	70	46	48	59	75	73	39	60	74	43	82	109	65	58	68
NK4A214_group	103	96	52	66	47	90	28	51	50	42	43	80	36	89	93
Blautia	54	8	76	120	72	8	22	30	54	24	45	138	24	42	65
Prevotellaceae_NK3B31_group	71	138	88	10	19	59	1	178	57	9	9	18	31	81	8
f__Atopobiaceae_Unclassified	50	118	130	36	67	33	28	28	28	49	1	23	65	40	69
Lachnospiraceae_UCG-001	11	11	33	20	6	31	15	5	3	4	509	22	43	31	16
Tuzzerella	47	16	50	78	65	86	25	33	33	11	93	57	31	37	17
Lachnospiraceae_FCS020_group	35	13	22	94	72	74	48	15	24	42	47	27	19	13	19
Gastranaerophilales	29	10	30	7	19	8	39	22	19	78	79	17	59	40	105
Intestinimonas	24	11	29	56	56	15	9	18	21	16	62	44	17	16	38
Acetatifactor	25	10	18	12	9	18	11	21	18	31	51	85	51	19	52
Lachnospiraceae_UCG-006	29	12	14	98	65	40	17	10	14	19	29	22	13	13	22
UBA1819	11	14	18	126	96	25	19	4	5	17	30	18	11	8	12
[Eubacterium]_nodatum_group	67	45	23	28	29	13	22	12	30	28	5	30	14	33	14
Anaerotruncus	25	18	29	47	47	18	9	17	24	19	70	17	19	7	26
Peptococcus	35	13	14	33	34	15	17	8	14	13	79	41	9	24	35
Bifidobacterium	12	3	8	1	2	26	19	17	3	41	16	22	71	53	37
Anaerovorax	27	14	16	12	9	46	11	41	40	10	10	28	16	18	12
Unclassified_Unclassified	12	13	12	52	36	26	6	3	7	6	14	17	7	4	47
Lachnospiraceae_NK4B4_group	8	5	8	11	3	20	16	21	21	18	12	48	24	12	25
Family_XIII_AD3011_group	27	22	18	13	18	14	6	12	11	14	17	24	16	12	21
Butyricicoccus	21	5	16	33	12	28	24	9	21	19	18	13	9	6	10
A2	22	29	10	33	21	31	11	7	12	9	6	9	5	1	8
f__Erysipelotrichaceae_Unclassified	10	21	5	1	83	1	6	4	12	11	5	18	5	5	9
Negativibacillus	20	10	17	15	12	5	16	8	6	8	10	20	13	19	15
Christensenellaceae_R-7_group	31	23	12	9	11	2	13	11	16	9	6	7	12	10	13
f__Christensenellaceae_Unclassified	13	6	8	9	7	4	14	12	15	12	17	21	13	9	9
Erysipelatoclostridium	0	0	0	0	1	0	2	2	99	10	1	3	3	5	13
Monoglobus	25	19	9	19	8	1	3	13	6	3	3	4	2	1	1
Candidatus_Soleaferrea	12	11	12	5	6	2	6	5	3	3	2	7	12	6	6
UCG-005	0	17	5	0	0	0	2	9	27	6	0	3	1	8	4
Tyzzerella	1	0	4	10	10	0	15	3	0	9	8	3	11	3	3
Caldicoprobacter	2	2	1	0	1	0	4	0	2	1	4	1	1	1	2

## Sheet: alpha_rarefaction
sample	ace	chao1	shannon	simpson	goods_coverage
Vehicle1	280.205	283	6.21	0.972	0.999
Vehicle2	276.454	279.867	5.737	0.965	0.999
Vehicle3	284.531	283.667	6.04	0.968	1
Vehicle4	273.109	273.273	6.476	0.978	1
Vehicle5	284.576	290.545	6.303	0.973	0.999
CCl4 1	278.3	282.25	5.983	0.961	0.999
CCl4 2	284.831	290.364	5.899	0.963	0.999
CCl4 3	282.21	280.9	5.904	0.964	1
CCl4 4	269.225	268.571	6.152	0.97	1
CCl4 5	281.727	281.25	6.057	0.964	1
Salecan1	280.453	295	6.524	0.978	0.999
Salecan2	286.851	287.091	6.402	0.973	1
Salecan3	287.039	287	5.808	0.948	0.999
Salecan4	282.132	285.273	5.985	0.967	1
Salecan5	289.247	290.5	6.537	0.978	1

## Sheet: pca_sites
sample	PC1	PC2	PC3
Vehicle1	-3.723	5.586	2.416
Vehicle2	-8.021	5.701	-4.183
Vehicle3	-1.312	1.342	-2.611
Vehicle4	16.408	10.951	-3.739
Vehicle5	9.404	8.886	-5.969
CCl4 1	2.183	5.667	16.396
CCl4 2	-5.661	-4.693	-4.256
CCl4 3	-7.228	-1.142	1.455
CCl4 4	-5.336	-1.468	5.565
CCl4 5	-4.188	0.041	2.403
Salecan1	18.378	-15.835	1.708
Salecan2	0.89	-5.639	1.018
Salecan3	-4.359	-4.312	-3.732
Salecan4	-6.224	-4.242	-4.682
Salecan5	-1.212	-0.843	-1.79

## Sheet: lefse
Group	Vehicle1	Vehicle2	Vehicle3	Vehicle4	Vehicle5	CCl4 1	CCl4 2	CCl4 3	CCl4 4	CCl4 5	Salecan1	Salecan2	Salecan3	Salecan4	Salecan5
k__Bacteria|p__Actinobacteriota	0.00458731	0.00671231	0.00644247	0.0040139	0.00590279	0.00421628	0.00317064	0.00425001	0.00320437	0.007252	0.00340675	0.00404763	0.00708335	0.00499207	0.00640874
k__Bacteria|p__Actinobacteriota|c__Actinobacteria	0.000404763	0.000101191	0.000269842	3.37302e-05	6.74605e-05	0.000876986	0.000640874	0.000573414	0.000101191	0.00138294	0.000539684	0.000742065	0.00239485	0.0017877	0.00124802
k__Bacteria|p__Actinobacteriota|c__Actinobacteria|o__Bifidobacteriales	0.000404763	0.000101191	0.000269842	3.37302e-05	6.74605e-05	0.000876986	0.000640874	0.000573414	0.000101191	0.00138294	0.000539684	0.000742065	0.00239485	0.0017877	0.00124802
k__Bacteria|p__Actinobacteriota|c__Actinobacteria|o__Bifidobacteriales|f__Bifidobacteriaceae	0.000404763	0.000101191	0.000269842	3.37302e-05	6.74605e-05	0.000876986	0.000640874	0.000573414	0.000101191	0.00138294	0.000539684	0.000742065	0.00239485	0.0017877	0.00124802
k__Bacteria|p__Actinobacteriota|c__Actinobacteria|o__Bifidobacteriales|f__Bifidobacteriaceae|g__Bifidobacterium	0.000404763	0.000101191	0.000269842	3.37302e-05	6.74605e-05	0.000876986	0.000640874	0.000573414	0.000101191	0.00138294	0.000539684	0.000742065	0.00239485	0.0017877	0.00124802
k__Bacteria|p__Actinobacteriota|c__Coriobacteriia	0.00418255	0.00661112	0.00617263	0.00398017	0.00583533	0.00333929	0.00252977	0.00367659	0.00310318	0.00586906	0.00286707	0.00330556	0.0046885	0.00320437	0.00516072
k__Bacteria|p__Actinobacteriota|c__Coriobacteriia|o__Coriobacteriales	0.00418255	0.00661112	0.00617263	0.00398017	0.00583533	0.00333929	0.00252977	0.00367659	0.00310318	0.00586906	0.00286707	0.00330556	0.0046885	0.00320437	0.00516072
k__Bacteria|p__Actinobacteriota|c__Coriobacteriia|o__Coriobacteriales|f__Atopobiaceae	0.00168651	0.00398017	0.00438493	0.00121429	0.00225993	0.0011131	0.000944446	0.000944446	0.000944446	0.00165278	3.37302e-05	0.000775795	0.00219246	0.00134921	0.00232739
k__Bacteria|p__Actinobacteriota|c__Coriobacteriia|o__Coriobacteriales|f__Eggerthellaceae	0.00249604	0.00263096	0.0017877	0.00276588	0.0035754	0.00222619	0.00158532	0.00273215	0.00215873	0.00421628	0.00283334	0.00252977	0.00249604	0.00185516	0.00283334
k__Bacteria|p__Actinobacteriota|c__Coriobacteriia|o__Coriobacteriales|f__Eggerthellaceae|g__Enterorhabdus	0.00249604	0.00263096	0.0017877	0.00276588	0.0035754	0.00222619	0.00158532	0.00273215	0.00215873	0.00421628	0.00283334	0.00252977	0.00249604	0.00185516	0.00283334
k__Bacteria|p__Bacteroidota	0.396667	0.32634	0.424461	0.320808	0.422876	0.249233	0.618781	0.496104	0.400277	0.426519	0.365703	0.392687	0.544574	0.511215	0.357169
k__Bacteria|p__Bacteroidota|c__Bacteroidia	0.396667	0.32634	0.424461	0.320808	0.422876	0.249233	0.618781	0.496104	0.400277	0.426519	0.365703	0.392687	0.544574	0.511215	0.357169
k__Bacteria|p__Bacteroidota|c__Bacteroidia|o__Bacteroidales	0.396667	0.32634	0.424461	0.320808	0.422876	0.249233	0.618781	0.496104	0.400277	0.426519	0.365703	0.392687	0.544574	0.511215	0.357169
k__Bacteria|p__Bacteroidota|c__Bacteroidia|o__Bacteroidales|f__Bacteroidaceae	0.0134921	0.0101528	0.0102203	0.01275	0.012008	0.0272203	0.0259048	0.0231727	0.0275576	0.0137957	0.0354842	0.0217897	0.0209802	0.0331905	0.014875
k__Bacteria|p__Bacteroidota|c__Bacteroidia|o__Bacteroidales|f__Bacteroidaceae|g__Bacteroides	0.0134921	0.0101528	0.0102203	0.01275	0.012008	0.0272203	0.0259048	0.0231727	0.0275576	0.0137957	0.0354842	0.0217897	0.0209802	0.0331905	0.014875
k__Bacteria|p__Bacteroidota|c__Bacteroidia|o__Bacteroidales|f__Marinifilaceae	0.00239485	0.00138294	0.00387898	0.00182143	0.00175397	0.00320437	0.0098155	0.00445239	0.00451985	0.00225993	0.00806152	0.00431747	0.00624009	0.00704962	0.00340675
k__Bacteria|p__Bacteroidota|c__Bacteroidia|o__Bacteroidales|f__Marinifilaceae|g__Butyricimonas	0.00239485	0.00138294	0.00387898	0.00182143	0.00175397	0.00320437	0.0098155	0.00445239	0.00451985	0.00225993	0.00806152	0.00431747	0.00624009	0.00704962	0.00340675
k__Bacteria|p__Bacteroidota|c__Bacteroidia|o__Bacteroidales|f__Muribaculaceae	0.272878	0.255776	0.282187	0.236618	0.305056	0.151516	0.391507	0.300907	0.244274	0.243735	0.184538	0.220528	0.282997	0.327588	0.212973
k__Bacteria|p__Bacteroidota|c__Bacteroidia|o__Bacteroidales|f__Muribaculaceae|g__Muribaculaceae	0.260296	0.244139	0.269639	0.227578	0.292981	0.137586	0.370695	0.28276	0.224576	0.232233	0.15978	0.200256	0.257699	0.295241	0.186933
k__Bacteria|p__Bacteroidota|c__Bacteroidia|o__Bacteroidales|f__Muribaculaceae|g__Muribaculum	0.0125814	0.0116369	0.0125476	0.0090397	0.0120754	0.0139306	0.0208115	0.0181469	0.0196985	0.011502	0.024758	0.0202719	0.0252977	0.0323473	0.0260397
k__Bacteria|p__Bacteroidota|c__Bacteroidia|o__Bacteroidales|f__Prevotellaceae	0.0806827	0.0385536	0.0907006	0.041758	0.0735656	0.043006	0.119607	0.126961	0.0929268	0.132526	0.0798732	0.102304	0.195602	0.0938375	0.0904307
k__Bacteria|p__Bacteroidota|c__Bacteroidia|o__Bacteroidales|f__Prevotellaceae|g__Alloprevotella	0.0719128	0.0286032	0.0844268	0.0343711	0.0632104	0.037508	0.112963	0.112086	0.0864168	0.126826	0.0706648	0.0953891	0.186697	0.0855399	0.0850002
k__Bacteria|p__Bacteroidota|c__Bacteroidia|o__Bacteroidales|f__Prevotellaceae|g__Prevotellaceae_NK3B31_group	0.00239485	0.00465477	0.00296826	0.000337302	0.000640874	0.00199008	3.37302e-05	0.00600398	0.00192262	0.000303572	0.000303572	0.000607144	0.00104564	0.00273215	0.000269842
k__Bacteria|p__Bacteroidota|c__Bacteroidia|o__Bacteroidales|f__Prevotellaceae|g__Prevotellaceae_UCG-001	0.00637501	0.00529565	0.00330556	0.00704962	0.0097143	0.00350794	0.00661112	0.00887105	0.00458731	0.00539684	0.00890478	0.00630755	0.00785914	0.00556549	0.00516072
k__Bacteria|p__Bacteroidota|c__Bacteroidia|o__Bacteroidales|f__Rikenellaceae	0.0260397	0.0191588	0.0365298	0.0261072	0.0291092	0.0224643	0.0693493	0.0377779	0.0285695	0.032752	0.0508989	0.0406449	0.0355517	0.0455695	0.0331905
k__Bacteria|p__Bacteroidota|c__Bacteroidia|o__Bacteroidales|f__Rikenellaceae|g__Alistipes	0.0226667	0.0173036	0.0324147	0.0231727	0.0248929	0.0191588	0.0423989	0.0278274	0.0259723	0.0234088	0.0376092	0.0294802	0.0294802	0.0304921	0.0273552
k__Bacteria|p__Bacteroidota|c__Bacteroidia|o__Bacteroidales|f__Rikenellaceae|g__Rikenellaceae_RC9_gut_group	0.00337302	0.00185516	0.00411509	0.00293453	0.00421628	0.00330556	0.0269505	0.00995042	0.00259723	0.00934327	0.0132897	0.0111647	0.00607144	0.0150774	0.00583533
k__Bacteria|p__Bacteroidota|c__Bacteroidia|o__Bacteroidales|f__Tannerellaceae	0.00118056	0.00131548	0.000910716	0.00175397	0.00138294	0.00182143	0.0025635	0.00283334	0.00242858	0.0014504	0.00684724	0.00310318	0.00317064	0.00398017	0.00222619
k__Bacteria|p__Bacteroidota|c__Bacteroidia|o__Bacteroidales|f__Tannerellaceae|g__Parabacteroides	0.00118056	0.00131548	0.000910716	0.00175397	0.00138294	0.00182143	0.0025635	0.00283334	0.00242858	0.0014504	0.00684724	0.00310318	0.00317064	0.00398017	0.00222619
k__Bacteria|p__Cyanobacteria	0.000978177	0.000337302	0.00101191	0.000236112	0.000640874	0.000269842	0.00131548	0.000742065	0.000640874	0.00263096	0.00266469	0.000573414	0.00199008	0.00134921	0.00354167
k__Bacteria|p__Cyanobacteria|c__Vampirivibrionia	0.000978177	0.000337302	0.00101191	0.000236112	0.000640874	0.000269842	0.00131548	0.000742065	0.000640874	0.00263096	0.00266469	0.000573414	0.00199008	0.00134921	0.00354167
k__Bacteria|p__Cyanobacteria|c__Vampirivibrionia|o__Gastranaerophilales	0.000978177	0.000337302	0.00101191	0.000236112	0.000640874	0.000269842	0.00131548	0.000742065	0.000640874	0.00263096	0.00266469	0.000573414	0.00199008	0.00134921	0.00354167
k__Bacteria|p__Cyanobacteria|c__Vampirivibrionia|o__Gastranaerophilales|f__Gastranaerophilales	0.000978177	0.000337302	0.00101191	0.000236112	0.000640874	0.000269842	0.00131548	0.000742065	0.000640874	0.00263096	0.00266469	0.000573414	0.00199008	0.00134921	0.00354167
k__Bacteria|p__Cyanobacteria|c__Vampirivibrionia|o__Gastranaerophilales|f__Gastranaerophilales|g__Gastranaerophilales	0.000978177	0.000337302	0.00101191	0.000236112	0.000640874	0.000269842	0.00131548	0.000742065	0.000640874	0.00263096	0.00266469	0.000573414	0.00199008	0.00134921	0.00354167
k__Bacteria|p__Deferribacterota	0.000337302	0.000573414	0.000236112	0.0122778	0.0040139	0.01275	0.000404763	0.000269842	0.00128175	0.000404763	0.00128175	0.00104564	0.000168651	0.000202381	0.00330556
k__Bacteria|p__Deferribacterota|c__Deferribacteres	0.000337302	0.000573414	0.000236112	0.0122778	0.0040139	0.01275	0.000404763	0.000269842	0.00128175	0.000404763	0.00128175	0.00104564	0.000168651	0.000202381	0.00330556
k__Bacteria|p__Deferribacterota|c__Deferribacteres|o__Deferribacterales	0.000337302	0.000573414	0.000236112	0.0122778	0.0040139	0.01275	0.000404763	0.000269842	0.00128175	0.000404763	0.00128175	0.00104564	0.000168651	0.000202381	0.00330556
k__Bacteria|p__Deferribacterota|c__Deferribacteres|o__Deferribacterales|f__Deferribacteraceae	0.000337302	0.000573414	0.000236112	0.0122778	0.0040139	0.01275	0.000404763	0.000269842	0.00128175	0.000404763	0.00128175	0.00104564	0.000168651	0.000202381	0.00330556
k__Bacteria|p__Deferribacterota|c__Deferribacteres|o__Deferribacterales|f__Deferribacteraceae|g__Mucispirillum	0.000337302	0.000573414	0.000236112	0.0122778	0.0040139	0.01275	0.000404763	0.000269842	0.00128175	0.000404763	0.00128175	0.00104564	0.000168651	0.000202381	0.00330556
k__Bacteria|p__Desulfobacterota	0.0125476	0.00735319	0.0151111	0.0454683	0.0388572	0.0210477	0.00465477	0.0111647	0.00957938	0.0083651	0.0229366	0.011873	0.00701589	0.00664485	0.0131885
k__Bacteria|p__Desulfobacterota|c__Desulfovibrionia	0.0125476	0.00735319	0.0151111	0.0454683	0.0388572	0.0210477	0.00465477	0.0111647	0.00957938	0.0083651	0.0229366	0.011873	0.00701589	0.00664485	0.0131885
k__Bacteria|p__Desulfobacterota|c__Desulfovibrionia|o__Desulfovibrionales	0.0125476	0.00735319	0.0151111	0.0454683	0.0388572	0.0210477	0.00465477	0.0111647	0.00957938	0.0083651	0.0229366	0.011873	0.00701589	0.00664485	0.0131885
k__Bacteria|p__Desulfobacterota|c__Desulfovibrionia|o__Desulfovibrionales|f__Desulfovibrionaceae	0.0125476	0.00735319	0.0151111	0.0454683	0.0388572	0.0210477	0.00465477	0.0111647	0.00957938	0.0083651	0.0229366	0.011873	0.00701589	0.00664485	0.0131885
k__Bacteria|p__Desulfobacterota|c__Desulfovibrionia|o__Desulfovibrionales|f__Desulfovibrionaceae|g__Bilophila	0.00296826	0.00141667	0.00306945	0.00532938	0.00418255	0.00333929	0.00131548	0.000573414	0.000640874	0.00131548	0.00516072	0.0032381	0.00138294	0.00158532	0.00313691
k__Bacteria|p__Desulfobacterota|c__Desulfovibrionia|o__Desulfovibrionales|f__Desulfovibrionaceae|g__Desulfovibrio	0.00957938	0.00593652	0.0120417	0.040139	0.0346747	0.0177084	0.00333929	0.0105913	0.00893851	0.00704962	0.0177758	0.00863494	0.00563295	0.00505953	0.0100516
k__Bacteria|p__Firmicutes	0.536412	0.557358	0.486626	0.590144	0.48332	0.688434	0.319999	0.461767	0.554795	0.51388	0.590751	0.548858	0.400412	0.405167	0.56687
k__Bacteria|p__Firmicutes|c__Bacilli	0.0160893	0.0130873	0.01501	0.00634128	0.0109286	0.0118393	0.0100516	0.0248592	0.0261747	0.052012	0.0114008	0.0177758	0.0386886	0.0156508	0.0396667
k__Bacteria|p__Firmicutes|c__Bacilli|o__Erysipelotrichales	0.0106588	0.0101865	0.0117044	0.00509326	0.00984923	0.00394644	0.00428374	0.0161905	0.0143353	0.0225655	0.00961311	0.0140655	0.0285358	0.00883732	0.0261409
k__Bacteria|p__Firmicutes|c__Bacilli|o__Erysipelotrichales|f__Erysipelatoclostridiaceae	0	0	0	0	3.37302e-05	0	6.74605e-05	6.74605e-05	0.00333929	0.000337302	3.37302e-05	0.000101191	0.000101191	0.000168651	0.000438493
k__Bacteria|p__Firmicutes|c__Bacilli|o__Erysipelotrichales|f__Erysipelatoclostridiaceae|g__Erysipelatoclostridium	0	0	0	0	3.37302e-05	0	6.74605e-05	6.74605e-05	0.00333929	0.000337302	3.37302e-05	0.000101191	0.000101191	0.000168651	0.000438493
k__Bacteria|p__Firmicutes|c__Bacilli|o__Erysipelotrichales|f__Erysipelotrichaceae	0.0106588	0.0101865	0.0117044	0.00509326	0.0098155	0.00394644	0.00421628	0.016123	0.0109961	0.0222282	0.00957938	0.0139643	0.0284346	0.00866867	0.0257024
k__Bacteria|p__Firmicutes|c__Bacilli|o__Erysipelotrichales|f__Erysipelotrichaceae|g__Faecalibaculum	0.00701589	0.00846629	0.00883732	0.00421628	0.00505953	0.00134921	0.00114683	0.00333929	0.00185516	0.00590279	0.00148413	0.00624009	0.0216211	0.00482342	0.0168988
k__Bacteria|p__Firmicutes|c__Bacilli|o__Erysipelotrichales|f__Erysipelotrichaceae|g__Turicibacter	0.00330556	0.00101191	0.00269842	0.000843256	0.00195635	0.0025635	0.00286707	0.0126488	0.00873613	0.0159544	0.0079266	0.00711708	0.00664485	0.00367659	0.00850002
k__Bacteria|p__Firmicutes|c__Bacilli|o__Lactobacillales	0.00543057	0.0029008	0.00330556	0.00124802	0.00107937	0.00789287	0.00576787	0.00866867	0.0118393	0.0294465	0.0017877	0.00371032	0.0101528	0.00681351	0.0135258
k__Bacteria|p__Firmicutes|c__Bacilli|o__Lactobacillales|f__Lactobacillaceae	0.00543057	0.0029008	0.00330556	0.00124802	0.00107937	0.00789287	0.00576787	0.00866867	0.0118393	0.0294465	0.0017877	0.00371032	0.0101528	0.00681351	0.0135258
k__Bacteria|p__Firmicutes|c__Bacilli|o__Lactobacillales|f__Lactobacillaceae|g__Lactobacillus	0.00543057	0.0029008	0.00330556	0.00124802	0.00107937	0.00789287	0.00576787	0.00866867	0.0118393	0.0294465	0.0017877	0.00371032	0.0101528	0.00681351	0.0135258
k__Bacteria|p__Firmicutes|c__Clostridia	0.520322	0.544271	0.471616	0.583803	0.472392	0.676595	0.309947	0.436908	0.52862	0.461868	0.57935	0.531082	0.361723	0.389517	0.527203
k__Bacteria|p__Firmicutes|c__Clostridia|o__Caldicoprobacterales	6.74605e-05	6.74605e-05	3.37302e-05	0	3.37302e-05	0	0.000134921	0	6.74605e-05	3.37302e-05	0.000134921	3.37302e-05	3.37302e-05	3.37302e-05	6.74605e-05
k__Bacteria|p__Firmicutes|c__Clostridia|o__Caldicoprobacterales|f__Caldicoprobacteraceae	6.74605e-05	6.74605e-05	3.37302e-05	0	3.37302e-05	0	0.000134921	0	6.74605e-05	3.37302e-05	0.000134921	3.37302e-05	3.37302e-05	3.37302e-05	6.74605e-05
k__Bacteria|p__Firmicutes|c__Clostridia|o__Caldicoprobacterales|f__Caldicoprobacteraceae|g__Caldicoprobacter	6.74605e-05	6.74605e-05	3.37302e-05	0	3.37302e-05	0	0.000134921	0	6.74605e-05	3.37302e-05	0.000134921	3.37302e-05	3.37302e-05	3.37302e-05	6.74605e-05
k__Bacteria|p__Firmicutes|c__Clostridia|o__Christensenellales	0.00148413	0.000978177	0.000674605	0.000607144	0.000607144	0.000202381	0.000910716	0.000775795	0.00104564	0.000708335	0.000775795	0.000944446	0.000843256	0.000640874	0.000742065
k__Bacteria|p__Firmicutes|c__Clostridia|o__Christensenellales|f__Christensenellaceae	0.00148413	0.000978177	0.000674605	0.000607144	0.000607144	0.000202381	0.000910716	0.000775795	0.00104564	0.000708335	0.000775795	0.000944446	0.000843256	0.000640874	0.000742065
k__Bacteria|p__Firmicutes|c__Clostridia|o__Christensenellales|f__Christensenellaceae|g__Christensenellaceae_R-7_group	0.00104564	0.000775795	0.000404763	0.000303572	0.000371032	6.74605e-05	0.000438493	0.000371032	0.000539684	0.000303572	0.000202381	0.000236112	0.000404763	0.000337302	0.000438493
k__Bacteria|p__Firmicutes|c__Clostridia|o__Clostridiales	0.00543057	3.37302e-05	0.00364286	0	3.37302e-05	0.00458731	0.0087024	0.0170675	0.0122778	0.019125	0.000438493	0.00330556	0.00263096	0.00161905	0.00566668
k__Bacteria|p__Firmicutes|c__Clostridia|o__Clostridiales|f__Clostridiaceae	0.00543057	3.37302e-05	0.00364286	0	3.37302e-05	0.00458731	0.0087024	0.0170675	0.0122778	0.019125	0.000438493	0.00330556	0.00263096	0.00161905	0.00566668
k__Bacteria|p__Firmicutes|c__Clostridia|o__Clostridiales|f__Clostridiaceae|g__Clostridium_sensu_stricto_1	0.00543057	3.37302e-05	0.00364286	0	3.37302e-05	0.00458731	0.0087024	0.0170675	0.0122778	0.019125	0.000438493	0.00330556	0.00263096	0.00161905	0.00566668
k__Bacteria|p__Firmicutes|c__Clostridia|o__Clostridia_UCG-014	0.127871	0.177994	0.0952204	0.0488751	0.0372382	0.143826	0.0462104	0.0978851	0.139238	0.0697204	0.00951192	0.0505953	0.0353155	0.0643235	0.0850676
k__Bacteria|p__Firmicutes|c__Clostridia|o__Clostridia_UCG-014|f__Clostridia_UCG-014	0.127871	0.177994	0.0952204	0.0488751	0.0372382	0.143826	0.0462104	0.0978851	0.139238	0.0697204	0.00951192	0.0505953	0.0353155	0.0643235	0.0850676
k__Bacteria|p__Firmicutes|c__Clostridia|o__Clostridia_UCG-014|f__Clostridia_UCG-014|g__Clostridia_UCG-014	0.127871	0.177994	0.0952204	0.0488751	0.0372382	0.143826	0.0462104	0.0978851	0.139238	0.0697204	0.00951192	0.0505953	0.0353155	0.0643235	0.0850676
k__Bacteria|p__Firmicutes|c__Clostridia|o__Clostridia_vadinBB60_group	0.00107937	0.000472223	0.00118056	0.000539684	0.000472223	0.00114683	0.00155159	0.000337302	0.00114683	0.00114683	0.0271866	0.00219246	0.00107937	0.00151786	0.000809525
k__Bacteria|p__Firmicutes|c__Clostridia|o__Clostridia_vadinBB60_group|f__Clostridia_vadinBB60_group	0.00107937	0.000472223	0.00118056	0.000539684	0.000472223	0.00114683	0.00155159	0.000337302	0.00114683	0.00114683	0.0271866	0.00219246	0.00107937	0.00151786	0.000809525
k__Bacteria|p__Firmicutes|c__Clostridia|o__Clostridia_vadinBB60_group|f__Clostridia_vadinBB60_group|g__Clostridia_vadinBB60_group	0.00107937	0.000472223	0.00118056	0.000539684	0.000472223	0.00114683	0.00155159	0.000337302	0.00114683	0.00114683	0.0271866	0.00219246	0.00107937	0.00151786	0.000809525
k__Bacteria|p__Firmicutes|c__Clostridia|o__Lachnospirales	0.286741	0.213512	0.256451	0.408979	0.321888	0.41785	0.181199	0.197625	0.226735	0.265794	0.374034	0.340338	0.229163	0.192161	0.29632
k__Bacteria|p__Firmicutes|c__Clostridia|o__Lachnospirales|f__Lachnospiraceae	0.286741	0.213512	0.256451	0.408979	0.321888	0.41785	0.181199	0.197625	0.226735	0.265794	0.374034	0.340338	0.229163	0.192161	0.29632
k__Bacteria|p__Firmicutes|c__Clostridia|o__Lachnospirales|f__Lachnospiraceae|g__A2	0.000742065	0.000978177	0.000337302	0.0011131	0.000708335	0.00104564	0.000371032	0.000236112	0.000404763	0.000303572	0.000202381	0.000303572	0.000168651	3.37302e-05	0.000269842
k__Bacteria|p__Firmicutes|c__Clostridia|o__Lachnospirales|f__Lachnospiraceae|g__Acetatifactor	0.000843256	0.000337302	0.000607144	0.000404763	0.000303572	0.000607144	0.000371032	0.000708335	0.000607144	0.00104564	0.00172024	0.00286707	0.00172024	0.000640874	0.00175397
k__Bacteria|p__Firmicutes|c__Clostridia|o__Lachnospirales|f__Lachnospiraceae|g__ASF356	0.000944446	0.000674605	0.00128175	0.00893851	0.00634128	0.00266469	0.00168651	0.00185516	0.00202381	0.0017877	0.00327183	0.00411509	0.00263096	0.00114683	0.00236112
k__Bacteria|p__Firmicutes|c__Clostridia|o__Lachnospirales|f__Lachnospiraceae|g__Blautia	0.00182143	0.000269842	0.0025635	0.00404763	0.00242858	0.000269842	0.000742065	0.00101191	0.00182143	0.000809525	0.00151786	0.00465477	0.000809525	0.00141667	0.00219246
k__Bacteria|p__Firmicutes|c__Clostridia|o__Lachnospirales|f__Lachnospiraceae|g__[Eubacterium]_fissicatena_group	0.0122103	0.0398691	0.00893851	0.00199008	0.00158532	0	0.00273215	0.0292441	0.0173373	0.0233076	0.00192262	0.010254	0.0283334	0.0180457	0.015752
k__Bacteria|p__Firmicutes|c__Clostridia|o__Lachnospirales|f__Lachnospiraceae|g__[Eubacterium]_ruminantium_group	0.0425001	0.0567005	0.0458056	0.000607144	0.017877	0.0202719	0.00276588	0.0173036	0.01501	0.00671231	0.00209127	0.0393294	0.0241846	0.0180794	0.0265794
k__Bacteria|p__Firmicutes|c__Clostridia|o__Lachnospirales|f__Lachnospiraceae|g__[Eubacterium]_xylanophilum_group	0.0173711	0.0141667	0.0121766	0.010254	0.009377	0.021756	0.00924208	0.0129524	0.0116369	0.0058016	0.00384525	0.00526192	0.00411509	0.00607144	0.00522818
k__Bacteria|p__Firmicutes|c__Clostridia|o__Lachnospirales|f__Lachnospiraceae|g__GCA-900066575	0.00337302	0.00232739	0.00269842	0.0117044	0.00785914	0.00499207	0.00246231	0.00182143	0.00286707	0.00317064	0.00377779	0.00762303	0.00263096	0.00293453	0.00698216
k__Bacteria|p__Firmicutes|c__Clostridia|o__Lachnospirales|f__Lachnospiraceae|g__Lachnoclostridium	0.00667858	0.00398017	0.00283334	0.0177758	0.00802779	0.0163592	0.00377779	0.00529565	0.00826391	0.00556549	0.00661112	0.0135596	0.00431747	0.00627382	0.00789287
k__Bacteria|p__Firmicutes|c__Clostridia|o__Lachnospirales|f__Lachnospiraceae|g__Lachnospiraceae_FCS020_group	0.00118056	0.000438493	0.000742065	0.00317064	0.00242858	0.00249604	0.00161905	0.000505953	0.000809525	0.00141667	0.00158532	0.000910716	0.000640874	0.000438493	0.000640874
k__Bacteria|p__Firmicutes|c__Clostridia|o__Lachnospirales|f__Lachnospiraceae|g__Lachnospiraceae_NK4A136_group	0.132155	0.0714069	0.119034	0.224407	0.177859	0.255338	0.111748	0.0913077	0.124633	0.161736	0.220933	0.16457	0.107566	0.0987958	0.146322
k__Bacteria|p__Firmicutes|c__Clostridia|o__Lachnospirales|f__Lachnospiraceae|g__Lachnospiraceae_NK4B4_group	0.000269842	0.000168651	0.000269842	0.000371032	0.000101191	0.000674605	0.000539684	0.000708335	0.000708335	0.000607144	0.000404763	0.00161905	0.000809525	0.000404763	0.000843256
k__Bacteria|p__Firmicutes|c__Clostridia|o__Lachnospirales|f__Lachnospiraceae|g__Lachnospiraceae_UCG-001	0.000371032	0.000371032	0.0011131	0.000674605	0.000202381	0.00104564	0.000505953	0.000168651	0.000101191	0.000134921	0.0171687	0.000742065	0.0014504	0.00104564	0.000539684
k__Bacteria|p__Firmicutes|c__Clostridia|o__Lachnospirales|f__Lachnospiraceae|g__Lachnospiraceae_UCG-006	0.000978177	0.000404763	0.000472223	0.00330556	0.00219246	0.00134921	0.000573414	0.000337302	0.000472223	0.000640874	0.000978177	0.000742065	0.000438493	0.000438493	0.000742065
k__Bacteria|p__Firmicutes|c__Clostridia|o__Lachnospirales|f__Lachnospiraceae|g__Marvinbryantia	0.0050258	0.00107937	0.000674605	0.00131548	0.00121429	0.00138294	0.00104564	0.00131548	0.00107937	0.000978177	0.00303572	0.00495834	0.00155159	0.00229366	0.00745438
k__Bacteria|p__Firmicutes|c__Clostridia|o__Lachnospirales|f__Lachnospiraceae|g__Roseburia	0.0109623	0.00182143	0.00573414	0.0194961	0.00964684	0.00576787	0.00391271	0.00266469	0.00391271	0.00408136	0.00796033	0.0176409	0.00944446	0.00620636	0.01275
k__Bacteria|p__Firmicutes|c__Clostridia|o__Lachnospirales|f__Lachnospiraceae|g__Tuzzerella	0.00158532	0.000539684	0.00168651	0.00263096	0.00219246	0.0029008	0.000843256	0.0011131	0.0011131	0.000371032	0.00313691	0.00192262	0.00104564	0.00124802	0.000573414
k__Bacteria|p__Firmicutes|c__Clostridia|o__Lachnospirales|f__Lachnospiraceae|g__Tyzzerella	3.37302e-05	0	0.000134921	0.000337302	0.000337302	0	0.000505953	0.000101191	0	0.000303572	0.000269842	0.000101191	0.000371032	0.000101191	0.000101191
k__Bacteria|p__Firmicutes|c__Clostridia|o__Monoglobales	0.000843256	0.000640874	0.000303572	0.000640874	0.000269842	3.37302e-05	0.000101191	0.000438493	0.000202381	0.000101191	0.000101191	0.000134921	6.74605e-05	3.37302e-05	3.37302e-05
k__Bacteria|p__Firmicutes|c__Clostridia|o__Monoglobales|f__Monoglobaceae	0.000843256	0.000640874	0.000303572	0.000640874	0.000269842	3.37302e-05	0.000101191	0.000438493	0.000202381	0.000101191	0.000101191	0.000134921	6.74605e-05	3.37302e-05	3.37302e-05
k__Bacteria|p__Firmicutes|c__Clostridia|o__Monoglobales|f__Monoglobaceae|g__Monoglobus	0.000843256	0.000640874	0.000303572	0.000640874	0.000269842	3.37302e-05	0.000101191	0.000438493	0.000202381	0.000101191	0.000101191	0.000134921	6.74605e-05	3.37302e-05	3.37302e-05
k__Bacteria|p__Firmicutes|c__Clostridia|o__Oscillospirales	0.0846291	0.142881	0.10598	0.11303	0.101966	0.0982561	0.0581846	0.102068	0.121834	0.0796708	0.157824	0.122272	0.0801093	0.122845	0.124228
k__Bacteria|p__Firmicutes|c__Clostridia|o__Oscillospirales|f__Butyricicoccaceae	0.00306945	0.00172024	0.00215873	0.00310318	0.00293453	0.00340675	0.002125	0.00232739	0.00320437	0.00209127	0.00337302	0.00411509	0.00249604	0.00215873	0.00263096
k__Bacteria|p__Firmicutes|c__Clostridia|o__Oscillospirales|f__Butyricicoccaceae|g__Butyricicoccus	0.000708335	0.000168651	0.000539684	0.0011131	0.000404763	0.000944446	0.000809525	0.000303572	0.000708335	0.000640874	0.000607144	0.000438493	0.000303572	0.000202381	0.000337302
k__Bacteria|p__Firmicutes|c__Clostridia|o__Oscillospirales|f__Butyricicoccaceae|g__UCG-009	0.00236112	0.00155159	0.00161905	0.00199008	0.00252977	0.00246231	0.00131548	0.00202381	0.00249604	0.0014504	0.00276588	0.00367659	0.00219246	0.00195635	0.00229366
k__Bacteria|p__Firmicutes|c__Clostridia|o__Oscillospirales|f__[Eubacterium]_coprostanoligenes_group	0.00381152	0.0632442	0.0282322	0.0108611	0.00829764	0.0176072	0.00219246	0.0482342	0.0408136	0.0114345	0.0114008	0.0252302	0.0172361	0.0591965	0.0264782
k__Bacteria|p__Firmicutes|c__Clostridia|o__Oscillospirales|f__[Eubacterium]_coprostanoligenes_group|g__[Eubacterium]_coprostanoligenes_group	0.00381152	0.0632442	0.0282322	0.0108611	0.00829764	0.0176072	0.00219246	0.0482342	0.0408136	0.0114345	0.0114008	0.0252302	0.0172361	0.0591965	0.0264782
k__Bacteria|p__Firmicutes|c__Clostridia|o__Oscillospirales|f__Oscillospiraceae	0.0538672	0.0260397	0.0467838	0.0703613	0.0637164	0.0635815	0.0277262	0.0402739	0.0549465	0.0425338	0.110669	0.0639188	0.0399703	0.0367659	0.0630755
k__Bacteria|p__Firmicutes|c__Clostridia|o__Oscillospirales|f__Oscillospiraceae|g__Colidextribacter	0.0166627	0.00957938	0.0151449	0.0250616	0.0228691	0.02351	0.00907343	0.0143691	0.0172361	0.0167302	0.0261072	0.0218235	0.0180119	0.0111984	0.0237798
k__Bacteria|p__Firmicutes|c__Clostridia|o__Oscillospirales|f__Oscillospiraceae|g__Intestinimonas	0.000809525	0.000371032	0.000978177	0.00188889	0.00188889	0.000505953	0.000303572	0.000607144	0.000708335	0.000539684	0.00209127	0.00148413	0.000573414	0.000539684	0.00128175
k__Bacteria|p__Firmicutes|c__Clostridia|o__Oscillospirales|f__Oscillospiraceae|g__NK4A214_group	0.00347421	0.0032381	0.00175397	0.00222619	0.00158532	0.00303572	0.000944446	0.00172024	0.00168651	0.00141667	0.0014504	0.00269842	0.00121429	0.00300199	0.00313691
k__Bacteria|p__Firmicutes|c__Clostridia|o__Oscillospirales|f__Oscillospiraceae|g__Oscillibacter	0.00293453	0.002125	0.0058016	0.00640874	0.0050258	0.0119742	0.00377779	0.00570041	0.00785914	0.00448612	0.0190576	0.0075893	0.00381152	0.00377779	0.0058016
k__Bacteria|p__Firmicutes|c__Clostridia|o__Oscillospirales|f__Oscillospiraceae|g__UCG-005	0	0.000573414	0.000168651	0	0	0	6.74605e-05	0.000303572	0.000910716	0.000202381	0	0.000101191	3.37302e-05	0.000269842	0.000134921
k__Bacteria|p__Firmicutes|c__Clostridia|o__Oscillospirales|f__Ruminococcaceae	0.0221945	0.0468513	0.026883	0.0269167	0.0254326	0.0122441	0.0218572	0.00930954	0.0199346	0.0215873	0.0294802	0.0249266	0.0178096	0.0207778	0.0296489
k__Bacteria|p__Firmicutes|c__Clostridia|o__Oscillospirales|f__Ruminococcaceae|g__Anaerotruncus	0.000843256	0.000607144	0.000978177	0.00158532	0.00158532	0.000607144	0.000303572	0.000573414	0.000809525	0.000640874	0.00236112	0.000573414	0.000640874	0.000236112	0.000876986
k__Bacteria|p__Firmicutes|c__Clostridia|o__Oscillospirales|f__Ruminococcaceae|g__Candidatus_Soleaferrea	0.000404763	0.000371032	0.000404763	0.000168651	0.000202381	6.74605e-05	0.000202381	0.000168651	0.000101191	0.000101191	6.74605e-05	0.000236112	0.000404763	0.000202381	0.000202381
k__Bacteria|p__Firmicutes|c__Clostridia|o__Oscillospirales|f__Ruminococcaceae|g__[Eubacterium]_siraeum_group	0.00246231	0.000337302	0.0029008	0.00590279	0.00202381	0.00330556	0.00364286	0.00121429	0.00209127	0.00489088	0.00597025	0.000371032	0.00175397	0.00263096	0.0014504
k__Bacteria|p__Firmicutes|c__Clostridia|o__Oscillospirales|f__Ruminococcaceae|g__Incertae_Sedis	0.00411509	0.00263096	0.00269842	0.00583533	0.0046885	0.00286707	0.00202381	0.00131548	0.00279961	0.00344048	0.00485715	0.00333929	0.00209127	0.00134921	0.00286707
k__Bacteria|p__Firmicutes|c__Clostridia|o__Oscillospirales|f__Ruminococcaceae|g__Negativibacillus	0.000674605	0.000337302	0.000573414	0.000505953	0.000404763	0.000168651	0.000539684	0.000269842	0.000202381	0.000269842	0.000337302	0.000674605	0.000438493	0.000640874	0.000505953
k__Bacteria|p__Firmicutes|c__Clostridia|o__Oscillospirales|f__Ruminococcaceae|g__Ruminococcus	0.0124127	0.0416568	0.0174385	0.00627382	0.0121429	0.00279961	0.0133572	0.00489088	0.0116369	0.0109623	0.0097143	0.017	0.0110972	0.0145377	0.0224643
k__Bacteria|p__Firmicutes|c__Clostridia|o__Oscillospirales|f__Ruminococcaceae|g__UBA1819	0.000371032	0.000472223	0.000607144	0.00425001	0.0032381	0.000843256	0.000640874	0.000134921	0.000168651	0.000573414	0.00101191	0.000607144	0.000371032	0.000269842	0.000404763
k__Bacteria|p__Firmicutes|c__Clostridia|o__Oscillospirales|f__UCG-010	0.00168651	0.0050258	0.00192262	0.0017877	0.00158532	0.00141667	0.00428374	0.00192262	0.00293453	0.00202381	0.0029008	0.00408136	0.00259723	0.00394644	0.00239485
k__Bacteria|p__Firmicutes|c__Clostridia|o__Oscillospirales|f__UCG-010|g__UCG-010	0.00168651	0.0050258	0.00192262	0.0017877	0.00158532	0.00141667	0.00428374	0.00192262	0.00293453	0.00202381	0.0029008	0.00408136	0.00259723	0.00394644	0.00239485
k__Bacteria|p__Firmicutes|c__Clostridia|o__Peptococcales	0.00394644	0.00222619	0.0029008	0.00566668	0.00526192	0.00532938	0.00175397	0.00161905	0.00225993	0.00273215	0.00661112	0.00512699	0.00205754	0.00195635	0.00384525
k__Bacteria|p__Firmicutes|c__Clostridia|o__Peptococcales|f__Peptococcaceae	0.00394644	0.00222619	0.0029008	0.00566668	0.00526192	0.00532938	0.00175397	0.00161905	0.00225993	0.00273215	0.00661112	0.00512699	0.00205754	0.00195635	0.00384525
k__Bacteria|p__Firmicutes|c__Clostridia|o__Peptococcales|f__Peptococcaceae|g__Peptococcus	0.00118056	0.000438493	0.000472223	0.0011131	0.00114683	0.000505953	0.000573414	0.000269842	0.000472223	0.000438493	0.00266469	0.00138294	0.000303572	0.000809525	0.00118056
k__Bacteria|p__Firmicutes|c__Clostridia|o__Peptostreptococcales-Tissierellales	0.00630755	0.00377779	0.00394644	0.00306945	0.00296826	0.00391271	0.0106925	0.0181806	0.0231727	0.0221608	0.00165278	0.00482342	0.00947819	0.00333929	0.00816271
k__Bacteria|p__Firmicutes|c__Clostridia|o__Peptostreptococcales-Tissierellales|f__Anaerovoracaceae	0.00408136	0.00273215	0.00192262	0.0017877	0.00188889	0.00246231	0.00131548	0.00219246	0.00273215	0.00175397	0.00107937	0.00276588	0.00155159	0.002125	0.00158532
k__Bacteria|p__Firmicutes|c__Clostridia|o__Peptostreptococcales-Tissierellales|f__Anaerovoracaceae|g__Anaerovorax	0.000910716	0.000472223	0.000539684	0.000404763	0.000303572	0.00155159	0.000371032	0.00138294	0.00134921	0.000337302	0.000337302	0.000944446	0.000539684	0.000607144	0.000404763
k__Bacteria|p__Firmicutes|c__Clostridia|o__Peptostreptococcales-Tissierellales|f__Anaerovoracaceae|g__[Eubacterium]_nodatum_group	0.00225993	0.00151786	0.000775795	0.000944446	0.000978177	0.000438493	0.000742065	0.000404763	0.00101191	0.000944446	0.000168651	0.00101191	0.000472223	0.0011131	0.000472223
k__Bacteria|p__Firmicutes|c__Clostridia|o__Peptostreptococcales-Tissierellales|f__Anaerovoracaceae|g__Family_XIII_AD3011_group	0.000910716	0.000742065	0.000607144	0.000438493	0.000607144	0.000472223	0.000202381	0.000404763	0.000371032	0.000472223	0.000573414	0.000809525	0.000539684	0.000404763	0.000708335
k__Bacteria|p__Firmicutes|c__Clostridia|o__Peptostreptococcales-Tissierellales|f__Peptostreptococcaceae	0.00222619	0.00104564	0.00202381	0.00128175	0.00107937	0.0014504	0.009377	0.0159881	0.0204405	0.0204068	0.000573414	0.00205754	0.0079266	0.00121429	0.00657739
k__Bacteria|p__Firmicutes|c__Clostridia|o__Peptostreptococcales-Tissierellales|f__Peptostreptococcaceae|g__Romboutsia	0.00222619	0.00104564	0.00202381	0.00128175	0.00107937	0.0014504	0.009377	0.0159881	0.0204405	0.0204068	0.000573414	0.00205754	0.0079266	0.00121429	0.00657739
k__Bacteria|p__Patescibacteria	0.0264445	0.0112659	0.0130199	0.00765676	0.00914089	0.00809525	0.0105576	0.00880359	0.0107599	0.0117044	0.00134921	0.00462104	0.00529565	0.00907343	0.00826391
k__Bacteria|p__Patescibacteria|c__Saccharimonadia	0.0264445	0.0112659	0.0130199	0.00765676	0.00914089	0.00809525	0.0105576	0.00880359	0.0107599	0.0117044	0.00134921	0.00462104	0.00529565	0.00907343	0.00826391
k__Bacteria|p__Patescibacteria|c__Saccharimonadia|o__Saccharimonadales	0.0264445	0.0112659	0.0130199	0.00765676	0.00914089	0.00809525	0.0105576	0.00880359	0.0107599	0.0117044	0.00134921	0.00462104	0.00529565	0.00907343	0.00826391
k__Bacteria|p__Patescibacteria|c__Saccharimonadia|o__Saccharimonadales|f__Saccharimonadaceae	0.0264445	0.0112659	0.0130199	0.00765676	0.00914089	0.00809525	0.0105576	0.00880359	0.0107599	0.0117044	0.00134921	0.00462104	0.00529565	0.00907343	0.00826391
k__Bacteria|p__Patescibacteria|c__Saccharimonadia|o__Saccharimonadales|f__Saccharimonadaceae|g__Candidatus_Saccharimonas	0.0264445	0.0112659	0.0130199	0.00765676	0.00914089	0.00809525	0.0105576	0.00880359	0.0107599	0.0117044	0.00134921	0.00462104	0.00529565	0.00907343	0.00826391
k__Bacteria|p__Proteobacteria	0.0189564	0.0169326	0.0199683	0.010254	0.0143353	0.00701589	0.0370695	0.0168651	0.0164941	0.0269842	0.0116707	0.0350794	0.0323136	0.0310655	0.0180457
k__Bacteria|p__Proteobacteria|c__Alphaproteobacteria	0.000303572	0.000944446	0.000472223	0.000236112	0.000371032	0.000134921	0.00522818	0.0017877	0.00101191	0.00104564	0.00310318	0.00172024	0.0014504	0.00367659	0.000944446
k__Bacteria|p__Proteobacteria|c__Alphaproteobacteria|o__Rhodospirillales	0.000303572	0.000944446	0.000472223	0.000236112	0.000371032	0.000134921	0.00522818	0.0017877	0.00101191	0.00104564	0.00310318	0.00172024	0.0014504	0.00367659	0.000944446
k__Bacteria|p__Proteobacteria|c__Gammaproteobacteria	0.0186528	0.0159881	0.0194961	0.0100179	0.0139643	0.00688097	0.0318413	0.0150774	0.0154822	0.0259385	0.00856748	0.0333592	0.0308632	0.0273889	0.0171012
k__Bacteria|p__Proteobacteria|c__Gammaproteobacteria|o__Burkholderiales	0.0186528	0.0159881	0.0194961	0.0100179	0.0139643	0.00688097	0.0318413	0.0150774	0.0154822	0.0259385	0.00856748	0.0333592	0.0308632	0.0273889	0.0171012
k__Bacteria|p__Proteobacteria|c__Gammaproteobacteria|o__Burkholderiales|f__Sutterellaceae	0.0186528	0.0159881	0.0194961	0.0100179	0.0139643	0.00688097	0.0318413	0.0150774	0.0154822	0.0259385	0.00856748	0.0333592	0.0308632	0.0273889	0.0171012
k__Bacteria|p__Proteobacteria|c__Gammaproteobacteria|o__Burkholderiales|f__Sutterellaceae|g__Parasutterella	0.0186528	0.0159881	0.0194961	0.0100179	0.0139643	0.00688097	0.0318413	0.0150774	0.0154822	0.0259385	0.00856748	0.0333592	0.0308632	0.0273889	0.0171012
k__Bacteria|p__Verrucomicrobiota|c__Verrucomicrobiae|o__Verrucomicrobiales|f__Akkermansiaceae|g__Akkermansia	0.00306945	0.0731271	0.0331231	0.00914089	0.0209127	0.00893851	0.00404763	3.37302e-05	0.00296826	0.00225993	0.000236112	0.00121429	0.00114683	0.0302897	0.0232064
