# Supplementary material for: Salecan ameliorates liver injury by regulating gut microbiota and its metabolites
Source: Royal Society of Chemistry journal article supplement (doi:10.1039/d2fo02210a), 2022-01-01
Supplement: d2fo02210a2.pdf [file d2fo02210a2.pdf]

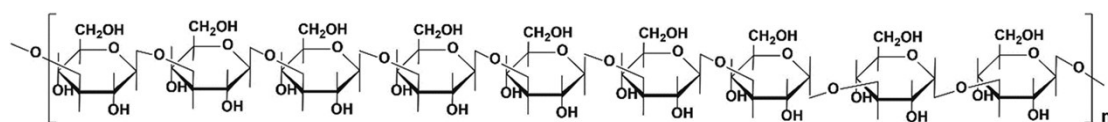

**Fig. S1** The molecular architecture of Salican.

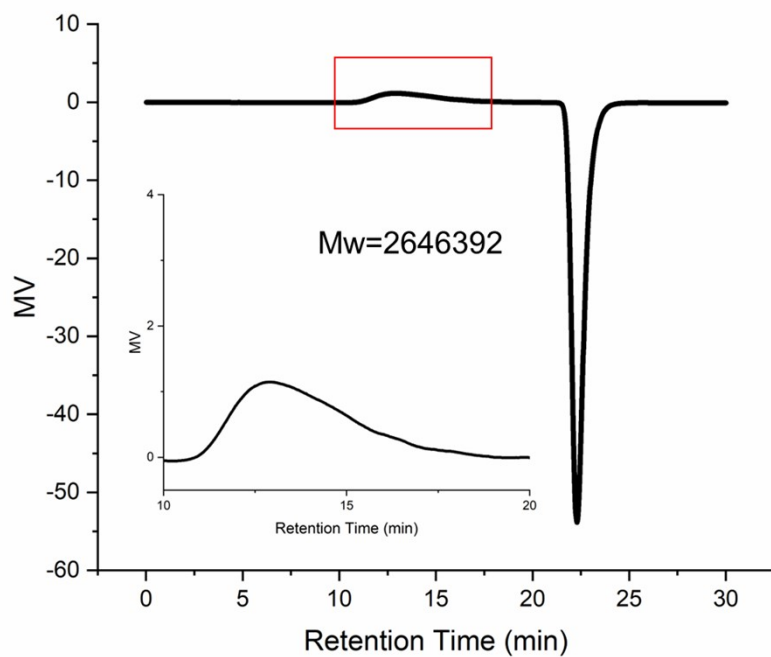

**Fig. S2** The molecular weight of Salecan was analyzed by using high-performance gel filtration chromatography.

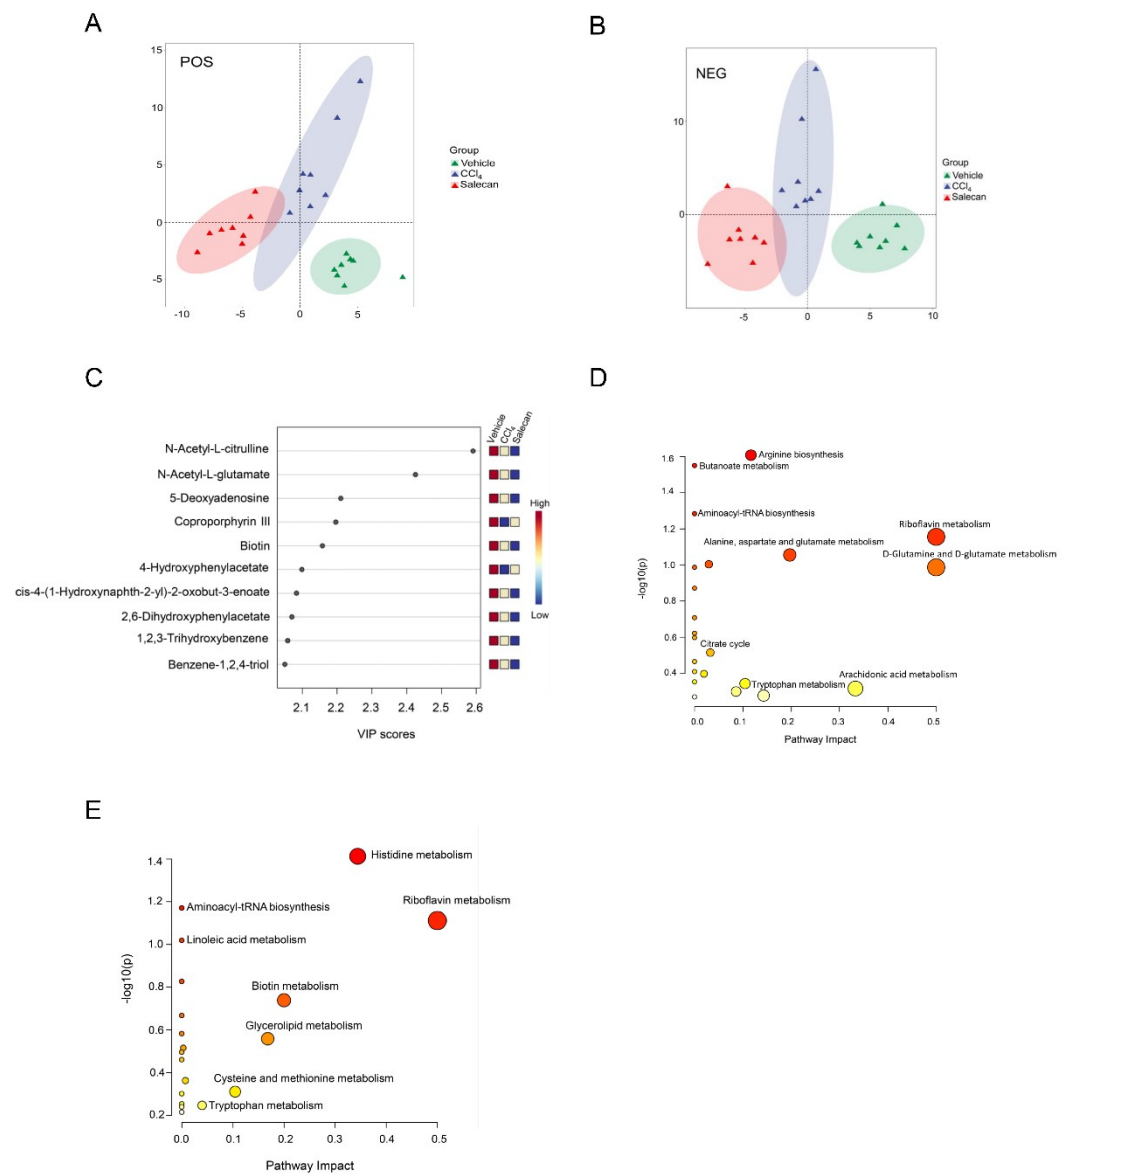

**Fig. S3 Effect of Salecan on intestinal metabolic profiles in liver injury mice.** (A-B) OPLS-DA score plot for the Vehicle, CCl<sub>4</sub>, and Salecan groups in the positive (A) and negative (B) model (n=8). (C) VIP values (n=8). (D-E) the metabolic pathway impact prediction based on the KEGG online database (D) between the Vehicle and CCl<sub>4</sub> groups, (E) between the CCl<sub>4</sub> and Salecan groups (n=8).

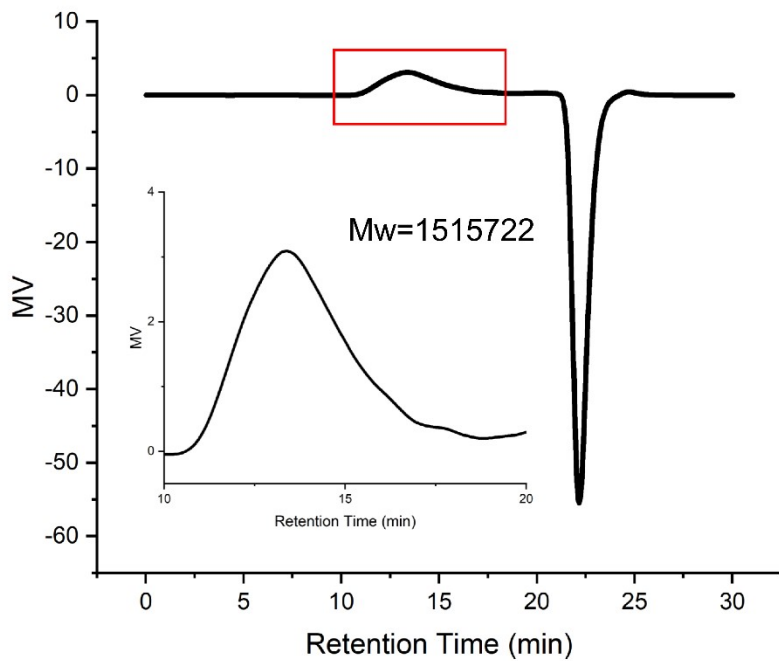

**Fig. S4** The molecular weight of Salecan metabolites was analyzed by using high-performance gel filtration chromatography.

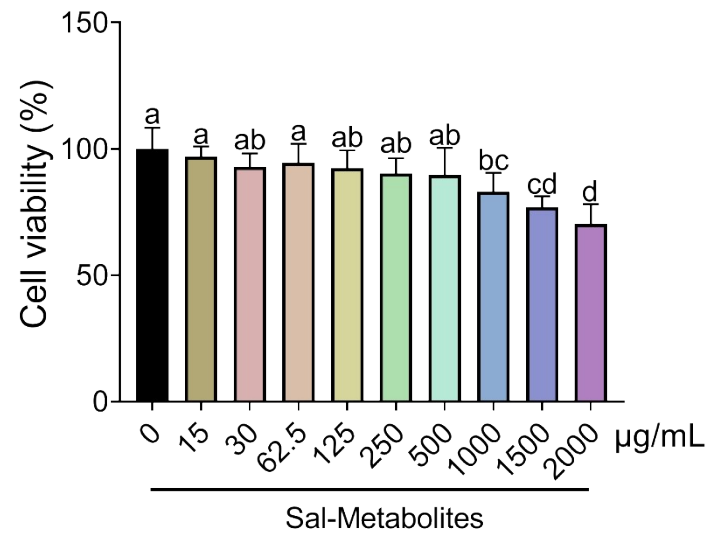

**Fig. S5** Effect of Sal-Metabolites on the cell viability in THLE-2 cells.

**Table S1. Primers used for the qPCR analysis of genes from mice**

| <b>Genes</b> | <b>Forward primer (5'-3')</b> | <b>Reverse primer (5'-3')</b> |
|--------------|-------------------------------|-------------------------------|
| <i>Nqo1</i>  | GGTAGCGGCTCCATGTACTC          | CGCAGGATGCCACTCTGAAT          |
| <i>Trx1</i>  | AAGCTTGTCGTGGTGGACTT          | AACTCCCCCACCTTTTGACC          |
| <i>Hmox1</i> | GCCGAGAATGCTGAGTTCATG         | TGGTACAAGGAAGCCATCACC         |
| <i>Gclc</i>  | GGGAACGGACGGGACG              | CAACATGTACTCCACCTCGT          |
| <i>36B4</i>  | GCCCTGCACTCTCGCTTTCT          | CAACTGGGCACCGAGGCAACAGTTG     |
| <i>Gsr</i>   | CCACGGCTATGCAACATTCG          | AATCAGGATGTGTGGAGCGG          |
| <i>Prdx5</i> | TCGTCCGGCTGAAAAGGTTCT         | ATCTGGCTCCACGTTTCAGTG         |
| <i>Gsta</i>  | CCAGGACTCTCACTAGACCGT         | CAATCTCCACCATGGGCACT          |

**Table S2. Primers used for the qPCR analysis of genes from human**

---

| <b>Genes</b> | <b>Forward primer (5'-3')</b> | <b>Reverse primer (5'-3')</b> |
|--------------|-------------------------------|-------------------------------|
| <i>Trx1</i>  | GTGAAGCAGATCGAGAGCAAG         | CGTGGCTGAGAAGTCAACTACTA       |
| <i>36B4</i>  | CAGCAAGTGGGAAGGTGTAATCC       | CCCATTCTATCATCAACGGGTACAA     |
| <i>Gclc</i>  | CACTTGCGTGAATGTTGGATG         | TGGGATCACTCGTGAAGGCT          |
| <i>Prdx5</i> | GCAAGACGGTGCAGTGAAG           | ATGGCATCTCCCACCTTGATT         |

---
