# Supplementary material for: Salecan ameliorates liver injury by regulating gut microbiota and its metabolites
Source: Royal Society of Chemistry journal article supplement (doi:10.1039/d2fo02210a), 2022-01-01
Supplement: d2fo02210a3.xlsx [file d2fo02210a3.xlsx]

## Sheet: negative ion mode
name	conound	mz	rt	Vehicle1	Vehicle2	Vehicle3	Vehicle4	Vehicle5	Vehicle6	Vehicle7	Vehicle8	CCl4 1	CCl4 2	CCl4 3	CCl4 4	CCl4 5	CCl4 6	CCl4 7	CCl4 8	SH1	SH2	SH3	SH4	SH5	SH6	SH7	SH8
M365T1348	(15Z)-Tetracosenoic acid	365.341	1347.78	469.253	488.714	305.624	321.082	411.065	1059.27	257.446	1471.07	795.26	577.507	554.51	798.614	494.273	743.821	731.052	420.03	612.155	560.442	978.744	645.293	362.666	504.059	818.993	358.647
M279T375	(3E)-4-(2-Carboxyphenyl)-2-oxobut-3-enoate;(3Z)-4-(2-Carboxyphenyl)-2-oxobut-3-enoate	279.048	374.743	2474.11	14376.9	9322.87	18073.4	15049.5	14303.2	14579.9	6483.6	7684.88	14374.4	16891.9	15071.5	13111	8942.57	18412.1	4356.45	15876	11815.4	17535	17780.5	22569.4	15349.9	16390.5	14887.1
M237T376	(3S)-2-Oxo-3-phenylbutanoate	237.077	375.824	6194.32	7727.89	19349	9802.31	18186.6	10174	8224.06	22221.9	7582.36	8619.83	22958.5	16691.1	6446.72	9923.74	33627.9	7028.14	58269.9	7447.21	15349.1	12690.3	26912	12094.4	22734.1	52982.7
M301T1006	(5Z,8Z,11Z,14Z,17Z)-Icosapentaenoic acid	301.217	1006.17	170252	660995	843716	1.05969e+06	930425	908776	908475	562513	785697	905388	1.06478e+06	1.15478e+06	889802	984360	1.02292e+06	480319	1.0404e+06	850239	1.08568e+06	899480	1.15331e+06	945901	746470	1.06506e+06
M305T1092	(8Z,11Z,14Z)-Icosatrienoic acid	305.248	1092.12	23986.8	42668.6	36277.2	50337.8	33267.4	61703.4	26504.3	59089.7	106500	97113.4	84967	46538.1	69078.5	70774.2	38516.8	72279.2	101531	61484.4	41970.9	40229.3	28627.4	79632.8	36798.2	24878.4
M253T1038	(9Z)-Hexadecenoic acid	253.217	1038.25	19804.3	61782.5	75459.3	64257.9	53525.5	56798.2	61688.1	159252	79447.3	72377	65622.8	73162.6	52018.5	93087.1	55426.6	58121.9	54897.5	87699.6	133502	141597	56033.7	62852.9	61415.8	62550.4
M282T1125	(9Z)-Octadecenoic acid;NA	282.252	1124.65	26680.1	42897.9	39895.2	68618.7	43451.3	67747.7	34267.6	65695.7	63435.9	43635.5	48857.9	59106.6	35551.5	52555.7	52149.4	51222.9	82089	67556.9	62871.8	63793.2	75872.3	59551.4	58254.9	46056.3
M277T1011	(9Z,12Z,15Z)-Octadecatrienoic acid	277.217	1010.62	46150	170217	220860	282743	185573	181406	255023	139373	197376	205638	229367	335272	159020	314292	326803	119018	302189	273126	316630	301474	417498	200139	253115	316964
M299T941	(R)-10-Hydroxystearate	299.259	941.461	2.05178e+06	1.11981e+06	843674	635481	1.10764e+06	882592	1.659e+06	2.40102e+06	1.77842e+06	2.21689e+06	2.01161e+06	1.59701e+06	1.24137e+06	783878	354860	2.36535e+06	1.9553e+06	1.62767e+06	797337	1.04193e+06	563716	2.63272e+06	1.82075e+06	1.27126e+06
M323T65	(R)-2-Ethylmalate	323.098	65.247	61414.6	70211.7	68507.3	78647.1	66136.1	52823.8	57908.3	57553.5	61969.1	61463.7	48359.9	72842.5	61593.8	61962.9	92996.8	61497.6	39737.9	51774.9	63630.2	65831.6	58232.5	57939.9	64136.6	49217.6
M295T49	(R)-2-Hydroxyglutarate;2-Hydroxyglutarate;(S)-2-Hydroxyglutarate;2-Dehydro-3-deoxy-L-arabinonate;2-Dehydro-3-deoxy-D-xylonate	295.063	49.3485	6149.82	13435.8	24311.8	22572.3	14591.1	13816.4	15047.4	21032.6	13896.6	12207.1	24651.4	21230.8	21035.4	14465	14854	21086.6	14569.9	12455.4	25201.6	10326.1	28667.7	13327.8	19119.2	28135.9
M147T101	(R)-Pantoate	147.066	101.415	5583.53	9116.42	16208.7	17901.8	16583.9	17352.1	15093.3	14172.9	23490.6	22749.7	3947.19	21857.4	22335.4	27085.4	29550.9	17462.1	8677.66	16118.5	29647.7	25839.2	4291.07	16334.2	32319.4	57937.3
M129T67	(S)-2-Hydroxyglutarate	129.02	67.4355	6915.41	6822.1	9554.86	5296.5	3633.02	4401.86	6024.13	7471.29	11332.3	6370.35	2683.51	7951.04	34560.4	24819	7397.94	54324.9	5823.84	8991.8	5402.67	5075.07	7441.45	13291.3	7298.14	92360.1
M115T51	(S)-Malate	115.003	51.392	5400.55	6282.51	7707.28	4035.66	5290.86	4913.39	7541.08	9573.37	3296.12	9435.3	8581.08	4750.42	8975.54	3790.75	8153.26	6533.73	7131.12	7509.17	4105.01	7497.31	8455.43	8360.28	8617.86	28983.1
M273T458	1,2,3-Trihydroxybenzene;Benzene-1,2,4-triol	273.041	458.06	13130.7	19443.7	18253.7	10947.3	21211.6	33724.2	14399.5	64673.1	19952.2	36004.3	13298.8	12489.2	4844.33	11435.7	10611.6	3838.63	12151.8	6256.72	5259.27	8128.28	4103.52	10669.5	12002.7	16792
M329T263	11beta-Hydroxyprogesterone	329.208	262.819	1171.08	3337.32	4025.81	4742.32	5233.88	3820.65	4243.61	2941.66	1943.44	4123.89	5398.96	6237.01	7597.33	2138.5	5669.41	1884.21	3283.68	2772.96	3353.58	3471.54	3219.48	4251.08	5915.81	5940.17
M423T500	12-Oxo-9(Z)-dodecenoic acid;Traumatin	423.274	500.063	256642	181843	204737	102609	52671	87782.4	78889.6	259361	235525	215284	143807	82535.5	53179.3	81160.3	61470.9	44300.1	129541	101007	48562.5	75400.9	30702.5	92176.4	139463	38355.3
M271T956	16-Hydroxypalmitate	271.228	955.519	123908	87970.2	53088.2	74816.3	87039.5	62308.5	89759.5	90888.8	92114.4	60623.7	51890.3	63005.8	40129.9	79695.7	46321.3	49308.4	62605.8	51761.3	58668.2	59965.8	55751.9	47324.9	51006.6	66612.3
M271T844	16-Hydroxypalmitate	271.228	843.801	256546	358296	463711	321933	411147	388795	755695	545231	270579	354976	466601	466759	302058	308973	602484	381915	397837	504351	458085	487563	424799	446925	553688	484177
M269T961	16-Oxopalmitate	269.212	960.509	31974.4	31725.8	34811.2	31371.9	31354.5	37742	32683	41569.7	30102	30211.3	37149.1	31397.6	33354.6	33276.1	34209.2	31857.2	30661.2	30774.8	30977.1	32225.3	44442.2	32639.2	33030.5	34091
M269T789	16-Oxopalmitate	269.212	788.616	15443.7	22294.3	22966.9	21044.9	26476.4	25936.4	31442.1	24978.7	23742.7	24821.6	25589.4	29921.3	63886.9	28817.9	23557.6	39635.4	27432.4	35669	32984.6	27728.4	33880.2	23236.8	32829.5	26832.6
M365T529	1-Hydroxy-2-naphthaldehyde	365.079	529.048	21230.7	24111.3	30843.3	38052.8	17237.9	22705.8	18508.3	17702.3	25464.7	24941.1	26158.9	34621.4	27413.2	22428.2	18864.4	24711.4	31045.1	35900.5	25745.7	20136.9	20246	21697.8	14015	14821.2
M343T648	1-Hydroxy-2-naphthaldehyde;2-Naphthoic acid	343.101	647.64	6125.64	8747.67	9752.6	8572.16	8953.66	9511.25	10525.2	8707.43	8320.27	8749.09	8098.09	10591	9698.03	10524.8	7096.61	7915.38	8090.05	8190.76	8852.91	10893.6	9691.05	8630.21	9712.23	11137.9
M283T536	1-Methoxy-2-hydroxyanthracene	283.098	535.854	11737.1	15247.9	9402.42	8236.09	3742.41	4770.07	9183.83	11008.4	10936.7	5537.75	3714.69	10060.2	2443.62	10365.2	5936.23	7256.63	5228.16	5109.02	10163.9	5576.42	7540.15	2927.13	6285.04	5725.45
M241T570	2,3-Bis(4-hydroxyphenyl)-1,2-propanediol	241.087	569.644	9657.78	21071.5	19910.2	22049	49116.7	53731.5	26378	25291.1	18970	22815.5	26679.6	25095.7	31185.2	24535.3	28215.1	20400.1	27683.3	26747.2	29444	25709.1	18688.5	23162.1	24204	21138.8
M301T409	2,4,6-Trihydroxytoluene;3-(2-Carboxyvinyl)naphthalene-2-carboxylic acid;2-Hydroxy-2H-benzo[h]chromene-2-carboxylate;cis-4-(1'-Hydroxynaphth-2'-yl)-2-oxobut-3-enoate	301.072	408.909	256088	221184	180030	149665	87138.3	150623	161704	211977	168706	171918	135437	188668	131938	185049	123366	222893	203986	212573	161128	135828	145221	150655	106920	112833
M249T98	2,4-Dihydroxyhept-2-enedioate;4-Hydroxy-2-oxo-heptanedioate	249.062	98.104	21216.3	4873.31	29060.2	572.6	21735.3	12479.5	42537.2	32730	27518.8	21654.3	12252.2	35617.2	32960.1	35619.3	38394.2	23790.4	31243.1	39549.8	39878.4	34710.1	55601.6	33648.6	30982.1	29955.4
M228T251	2,6-Dihydroxyphenylacetate;2-Hydroxy-2,4-pentadienoate;2-Hydroxy-3-carboxy-6-oxo-7-methylocta-2,4-dienoate;(S)-4-Hydroxymandelate	228.06	250.949	18632.4	20895.6	22511.8	1406.72	17901.8	18617.6	774.815	25164.3	23436.7	19895.5	2082.82	1878.71	1554.68	24287.9	4412.38	17338.3	951.772	17392.8	2608.04	2436.95	2699.36	762.214	3827.08	1789.46
M154T165	2-Acetolactate;4-Hydroxy-2-oxopentanoate;(S)-2-Acetolactate	154.022	165.131	517.369	834.651	821.207	1112.79	1278.19	1335.69	1002.52	1420.14	613.819	966.568	1960	849.994	1320.43	1174.86	2129.46	795.326	766.717	541.137	1244.45	1933	1028.56	865.658	853.299	1160.81
M176T345	2-Carboxy-2,3-dihydro-5,6-dihydroxyindole	176.035	344.589	5570.38	28153.4	25798.3	40396.7	39870.1	23296.5	25243.5	21023.6	25681.4	27872.1	21195.4	33592.5	25052.1	28111.4	23533.7	19254.1	17030	40927	33116.7	27856.6	59607.6	24723.9	26553.3	28773
M177T50	2-Dehydro-3-deoxy-D-gluconate;2-Dehydro-3-deoxy-D-galactonate	177.041	49.5015	42932.8	56915.2	66352.3	123914	65294	54063.3	67845.8	47047.2	73560.8	95347.4	72170.2	126775	156222	100599	219717	68009.7	51167.9	54089.3	164876	174100	235516	98247	135126	247371
M355T48	2-Dehydro-3-deoxy-D-gluconate;2-Dehydro-3-deoxy-D-galactonate;L-Gulono-1,4-lactone;L-Galactono-1,4-lactone;D-Galactono-1,5-lactone;D-Galactono-1,4-lactone;D-Glucono-1,5-lactone;3,6-Anhydro-L-galactonate	355.087	48.4055	22394.1	21917.9	19407.9	23116	21585.9	12689	21940.2	19788.1	23331.8	14769.9	21253.3	25758.4	21003.3	17108	29839.9	19910.4	19229	19361.1	19844.1	20397.1	22938.9	14546.9	22951.4	32735
M178T50	2-Dehydro-3-deoxy-D-gluconate;2-Dehydro-3-deoxy-D-galactonate;L-Gulono-1,4-lactone;L-Galactono-1,4-lactone;D-Galactono-1,5-lactone;D-Galactono-1,4-lactone;D-Glucono-1,5-lactone;3,6-Anhydro-L-galactonate	178.044	49.5885	1722.69	16879.8	2846.67	8504.35	3639.28	2293.74	4018.35	4210.03	7719.98	5853.11	6232.24	9407.14	12520.9	8407.48	13854.2	4601.05	10485.2	4138.9	13910.7	13785	18340.4	6979.22	9296.53	18734.3
M207T50	2-Dehydro-3-deoxy-L-arabinonate;2-Dehydro-3-deoxy-D-xylonate;(R)-2-Hydroxyglutarate;2-Hydroxyglutarate;(S)-2-Hydroxyglutarate	207.051	49.6	37147.7	35178.1	36507.7	38170.5	35329.3	31416.4	37378.6	28028.3	31034.4	40098.7	39550.7	51500.6	50517	31653.1	63819	44406.8	27776.2	31814.1	75975.3	82319.7	56248.3	39019.4	47271.5	118822
M323T50	2-Dehydro-3-deoxy-L-fuconate;2-Dehydro-3-deoxy-L-rhamnonate;2-Dehydro-3-deoxy-D-fuconate	323.098	50.258	98513.3	91879.2	86920.9	91914.3	103869	66859.4	83321.7	75840.1	81806.3	76623.3	91157.2	97925.8	84873	75880.4	111519	75315	61384.6	77925.9	89053.5	93582.9	98388.6	71552.2	77167	49305.1
M221T50	2-Dehydro-3-deoxy-L-rhamnonate;2-Dehydro-3-deoxy-D-fuconate	221.067	49.872	22736.4	27854	25741.9	32444.6	25266.3	21175.8	28188.5	27179.5	25423.4	27089.6	26782.8	34012.4	27979	27248.6	30010.4	26055.2	22667.5	24656.5	30342.2	28753.9	33459.8	22966.9	25004.5	19561.1
M150T273	2-Descarboxy-cyclo-dopa	150.056	273.49	356.259	1199.27	1534.63	317.63	413.563	905.14	610.975	1038.75	1269.71	451.56	763.281	327.174	5810.01	1775.2	948.099	5701.25	891.302	1422.89	4296.9	1513.81	915.468	1792.08	949.191	3286.07
M206T284	2-Formaminobenzoylacetate;4-(2-Aminophenyl)-2,4-dioxobutanoate	206.046	284.271	2.66417e+06	4.55242e+06	4.63897e+06	5.02158e+06	4.88362e+06	4.36909e+06	4.55664e+06	4.87303e+06	4.66872e+06	4.70584e+06	5.00131e+06	4.60032e+06	4.63645e+06	4.51969e+06	4.86281e+06	4.54945e+06	4.36582e+06	4.34381e+06	4.63811e+06	4.84619e+06	4.96755e+06	4.50816e+06	4.60143e+06	4.20176e+06
M302T409_1	2-Hydroxy-2H-benzo[h]chromene-2-carboxylate;cis-4-(1'-Hydroxynaphth-2'-yl)-2-oxobut-3-enoate;3-(2-Carboxyvinyl)naphthalene-2-carboxylic acid;2,4,6-Trihydroxytoluene	302.075	408.846	48952.7	43985	51956.4	28233.7	16424.9	30978.7	31063.5	38488.8	38323.9	32562	24534.1	41928.1	28984.5	34163.6	26422.8	42030.5	41506.7	43151.6	31327.3	27791.9	29658.1	27907.2	20643.2	20603.8
M411T581	2-Hydroxy-3-methylbenzalpyruvate	411.105	581.487	88655	287511	284270	231665	275968	426396	272184	269292	164205	158947	202661	206581	260349	200812	157047	316324	194359	236436	212543	200393	213631	251014	164519	160489
M175T51	2-Hydroxy-3-oxoadipate	175.025	50.877	21790.9	22827.9	25694.4	26064.3	26213.4	24611.8	31061.9	20465	19238.4	24301.5	32801.2	46037.2	36529.8	21926.7	44099.2	19083.3	21632	21999.6	30917	35052	31473.8	28848.5	29814.2	72120.6
M229T548	2-Hydroxy-4-(2-oxo-1,3-dihydro-2H-inden-1-ylidene)but-2-enoic acid;2-Hydroxy-4-(1-oxo-1,3-dihydro-2H-inden-2-ylidene)-but-2-enoic acid	229.051	548.477	4145.94	1673.76	2040.36	4353.99	1882.5	1858.67	1887.63	4342.17	1623.17	4214.68	2848.54	2105.87	1764.44	2514.88	3801.3	2318.14	2475.28	2297.81	2911.75	2392.22	2643.7	2767.57	4569.12	3995.6
M227T299	2-Hydroxy-6-oxoocta-2,4,7-trienoate	227.05	298.925	1786.68	2815.89	4370.95	2992.72	3724.43	4480.08	3287.17	3044.69	3055.54	4023.97	2555.72	3321.71	3378.87	4980.76	3513.8	3324.59	3655.97	4875.75	4625.77	4538.93	4862.7	4331.04	4188.73	3647.79
M433T566	2-Hydroxy-8-methylchromene-2-carboxylate	433.086	566.097	1003.29	3033.08	2293.05	2351.73	3474	2883.04	3419.77	2878.62	2278.4	2236.94	2189.82	2256.73	2594.98	3084.18	2802.43	2265.53	4022.37	5423.82	4349.33	2399.69	3439.01	4414.55	2890.35	2493.06
M227T381	2-Hydroxycyclohexan-1-one;epsilon-Caprolactone	227.129	380.759	100427	142695	162936	181241	195862	162025	198012	136292	161832	144380	140524	208156	187867	209600	195961	167113	154282	246365	233106	214914	243056	190715	197835	199832
M325T440	2-Hydroxyphenylacetate	325.072	439.57	21200	23053.5	20060	25427	24762.5	14955.5	27370.9	19908.6	18230.2	21753.5	20283.9	40425.9	14720.6	13416.9	18925.1	6085.05	15774.6	22158.6	24675	23061.2	34621.7	19538.8	18563.9	22677.8
M253T46	2-Keto-D-gluconic acid	253.054	46.372	4358.95	18942.3	4862.06	8751.92	3456.57	11099.9	11305.3	14507.7	20388.7	11970	5576.97	20457	21639.2	6419.57	8843.5	17709.6	5922.16	13538.6	11235.6	7332.45	18776.2	13573	17105.5	11920.7
M365T648	2-Naphthoic acid;1-Hydroxy-2-naphthaldehyde	365.083	647.639	17414.8	12529.7	10196	8440.55	11995.8	17751.9	19512.9	11614.3	13473.9	18543.8	10954.3	15542.1	10365.2	13982.5	16915.1	16910.1	8946.26	12846.6	14098.1	21652.7	18711.7	15645.8	11865.5	14090.5
M134T284	2-Phenylacetamide	134.061	284.262	1793.61	1853.19	2752.8	3000.66	3661.11	4069.01	2580.37	2945.59	2721.74	2906.2	2518.28	4977.17	2962.3	2824.01	7811.94	2603.36	3383.84	2487.06	3774.83	3261.87	3462.64	3875.82	5808.68	29333.4
M385T523	3-(2,3-Dihydroxyphenyl)propanoate	385.092	523.157	11281.3	4700.74	7561.98	19144.1	15398.6	21419.8	20415.3	5905.9	4607.26	18964.1	18164.7	17965.5	35462	9951.22	56645.3	9218.25	22007	13978.3	29126.9	42374.4	29060	28024.2	35567.6	51648.1
M386T523	3-(2,3-Dihydroxyphenyl)propanoate	386.095	523.105	2050.71	2148.3	2832.11	6357.53	4128.4	6035.79	3578.37	3381.38	2553.73	4607.12	4810.67	6351.76	10346.8	3029.66	12354.7	2282.7	5511.59	3608.36	7261.81	9173.64	6600.25	6777.23	7496.62	11004.3
M331T375	3-(2-Hydroxyphenyl)propanoate;3-(3-Hydroxyphenyl)propanoic acid	331.119	374.51	185706	165477	110158	718385	539981	484232	536664	183112	159250	432841	740411	448042	393236	304500	906914	148353	474106	300080	873017	692729	1.547e+06	404554	683147	632445
M165T375_2	3-(3-Hydroxyphenyl)propanoic acid;3-(2-Hydroxyphenyl)propanoate	165.056	374.62	39997.9	246022	874537	1.46348e+06	1.28331e+06	1.27036e+06	1.27942e+06	511247	655919	1.13803e+06	1.43183e+06	1.20275e+06	1.15227e+06	879874	1.62833e+06	411043	1.20764e+06	1.18176e+06	1.62226e+06	1.4856e+06	2.07052e+06	1.18497e+06	1.37124e+06	1.36907e+06
M181T210	3-(4-Hydroxyphenyl)lactate	181.051	209.837	8690.16	15284.3	20543.6	35483.2	12178.1	22477.3	25919.4	14412.9	20464.2	39462.4	28251.3	45472.2	59135.6	23216.8	88780.2	25381.2	30584.9	10724.3	56233	47139.2	78565.6	82471.8	61527.5	290235
M153T165	3,4-Dihydroxybenzoate	153.019	164.738	6275.26	7568.7	9253.41	8768.11	14137.8	13793.7	10214.9	16648.5	7526.9	13616.3	19802.9	11593	12370.3	9052.54	22115.4	7010.25	9696.22	9963.51	12584.5	19388.6	10692.5	9683.26	13863.2	21087.9
M153T281	3,4-Dihydroxybenzoate	153.019	280.513	5751.71	9569.93	28692.9	9162.29	9102.1	15788.4	11606.8	5678.95	11522.5	8545.34	17344.4	13055.5	49103.6	12614.3	34147.6	14107.6	8027.41	12532.1	10222.4	15903.1	18809.8	24398.3	25221.5	61707.7
M257T531	3,4-Dihydroxyfluorene;1,2-Dihydroxyfluorene	257.082	530.979	16594	11234.9	20820.2	23863.5	16412.2	22469.1	15373.9	19621	16417.7	27757.4	19853.8	23607.6	18294.9	10512	16660.3	14201.6	19338.3	10087.3	1502.34	17420.1	14503.2	25307	25337.4	23765.8
M178T112	3,4-Dihydroxy-L-phenylalanine	178.051	112.436	1800.14	11459.7	12344.5	25366.7	16192.8	14922.6	12201.4	14964.2	17162	13662.1	10273.9	14559.9	12057.5	35670	15252.6	5598.9	19113.9	37817.8	26500.8	13272.9	5973.23	19265	24159.6	16242.8
M389T798	3alpha,12alpha-Dihydroxy-5beta-chol-6-enoate	389.268	798.217	2.30372e+06	2.18625e+06	1.78712e+06	3.57978e+06	2.49994e+06	2.46907e+06	2.02776e+06	4.26858e+06	1.74167e+06	2.86793e+06	2.36929e+06	1.85529e+06	1.79384e+06	2.69623e+06	1.41169e+06	993824	2.14433e+06	2.15655e+06	1.21256e+06	1.29667e+06	1.05328e+06	2.71796e+06	2.06916e+06	1.0874e+06
M780T726	3alpha,12alpha-Dihydroxy-5beta-chol-6-enoate	779.545	725.848	1.14825e+06	74745.4	33078.2	73648.1	498162	721267	577392	2.63604e+06	1.4182e+06	1.37279e+06	1.02257e+06	817570	1.22407e+06	755733	554085	643773	1.49696e+06	600309	326129	498456	88460.9	390459	428059	146026
M389T726	3alpha,12alpha-Dihydroxy-5beta-chol-6-enoate;Cholic acid;3alpha,7alpha,12beta-Trihydroxy-5beta-cholanate	389.268	725.819	1.6473e+06	502827	420258	518970	1.12218e+06	1.22717e+06	1.04178e+06	2.37119e+06	1.73198e+06	1.82458e+06	1.36601e+06	99238.7	868345	1.24202e+06	639233	850975	2.10262e+06	1.46389e+06	927826	1.04349e+06	314301	1.11893e+06	788007	617207
M387T762	3alpha,7alpha-Dihydroxy-12-oxo-5beta-cholanate	387.253	761.986	260839	456935	406250	501069	498441	507002	589915	998307	489768	461134	392349	317985	716572	648396	276314	555812	521293	635967	231387	234471	355168	623619	512315	227914
M388T762	3alpha,7alpha-Dihydroxy-12-oxo-5beta-cholanate;7-Oxodeoxycholate	388.256	761.979	71811.3	127884	107958	129067	135998	183939	167429	265897	130014	123844	108046	83215.6	200662	175943	68338.7	147715	146123	165602	67809.6	57465.7	99782.7	171564	134666	65281.6
M245T284	3-Chloro-D-alanine;3-Chloro-L-alanine	245.014	284.275	5267.82	2337.17	13675.5	12147.9	2743.59	44800.2	12647.1	8630.14	7545.02	12981.7	15463.2	24270	7245.38	3819.74	166622	6729.66	34400.5	9781.55	12376.9	10452.5	14785.1	13880.8	91226	823440
M193T46	3-Dehydro-L-threonate;2-Keto-D-gluconic acid	193.035	46.434	11230.3	17054.3	13913.1	28988.5	23943.2	24244.4	37701.5	14677.8	18152.8	26096.1	28779.4	33637.6	57899	27001.1	91969.1	25835.4	41140.1	20369.1	54843.3	69422.8	45244.9	38358.8	47605.5	225129
M161T90	3-Ethylmalate	161.045	90.01	18598.8	28001	45237.7	19478	32318.6	24695	34854.9	27491.9	33688.2	23184.4	7945.21	38371.3	41138.7	41829.1	40769.4	40012.5	22894.5	15801.7	36837.2	17331.9	27000.6	40058.1	30883.9	180795
M151T303	3-Hydroxyphenylacetate;2-Hydroxyphenylacetate;4-Hydroxyphenylacetate	151.04	303.17	17570.3	54515.8	75652.6	53721.8	58059.7	64979.7	56843.7	62924.2	57153	31511.5	45786.9	52611.6	79911.7	106279	63091.6	80003.2	44080.1	71951.7	54203	48596.3	101045	89471	62200.4	58935.1
M215T270	3-Indoleacetonitrile	215.083	270.062	11657	22063	24639.7	24500.3	35129.8	31523	25991.7	30964.9	19393.9	17032.7	25404.6	29166.6	40711.9	28739	27142.6	25723.3	19453.4	25468.9	27848	24449.8	27363.9	30823.3	25985.2	32187.1
M216T270	3-Indoleacetonitrile	216.085	270.057	2469.9	5059.13	5146.54	5590.86	7364.77	5927.63	4842.02	6025.8	3734.8	3889	5326.11	7122.21	8089.34	6789.42	5659.1	4570.11	3792.75	5445.55	6022.3	5434.94	5235.42	6367.64	5976.04	8064.86
M144T334	3-Methyldioxyindole	144.046	333.6	180421	151725	149908	93545.6	41338.6	58368.9	170691	93222.5	115789	182675	145771	227289	121809	155001	137042	208918	207869	251506	263176	217242	172233	168082	122580	126988
M748T954	3-Oxo-5beta-cholanate	747.554	953.8	2207.32	12700.3	10126.8	9568.19	12482.5	15978.1	15399.6	15269.8	19631.6	16473.4	17443.3	20091.7	50456.1	59540.2	7465.44	44982.2	22587.6	41563.3	6630.17	5297.59	17100.8	37264.4	14232.5	7556.86
M373T954	3-Oxo-5beta-cholanate;Murideoxycholic acid;Hyodeoxycholate;Chenodeoxycholate	373.274	953.796	59141.2	135894	103791	118798	131472	138295	150436	129414	170490	152924	161313	167914	269623	280562	99461.1	253349	176173	245325	89848.6	89559.3	159399	224896	141198	102989
M175T121	3-Propylmalate	175.061	120.716	5062.48	8858.93	9433.75	10185.9	9853	8292.68	9946.61	12445.3	8512.97	39353.8	9440.33	11479.4	14637.5	12578.1	12653.8	11517	7087.72	9831.09	9523.68	8335.21	9769.61	10210	9796.86	17255.3
M204T295	4-(2-Amino-3-hydroxyphenyl)-2,4-dioxobutanoate	204.031	294.921	5721.89	26576.3	33322.4	48538.9	47656.1	36515.2	32840.1	43335.7	37121.3	39139.3	31214.9	46868.7	33029.1	40553.7	41400.3	17224.4	35425.8	48391.4	42702.2	42860.5	66175.2	52370.3	68362.8	62897
M222T284	4-(2-Amino-3-hydroxyphenyl)-2,4-dioxobutanoate	222.041	284.274	2257.15	9072.43	9913.86	14779	13058.9	13852.4	13824.7	13423.9	10990.7	12330.6	12592.7	14722.2	12447.2	13807.3	13232.2	13558.3	13056.2	12416.6	14255.9	15600.5	14370.3	13139.2	12404.5	12585.5
M188T284	4-(2-Aminophenyl)-2,4-dioxobutanoate	188.036	284.271	22131.5	53126.1	56293.3	62489.5	62346.1	57552.6	52123.1	58574.7	59926.9	58390.4	60125.4	62068	54088.1	55668.2	55880.8	50176.9	56623.1	50748.1	57677.3	61522.3	57162.7	54942.4	54396.5	50503.5
M206T262	4-(2-Aminophenyl)-2,4-dioxobutanoate	206.046	261.578	29514.1	49227.3	60070.3	22576	14656.3	25640.1	112680	49196.5	47338.7	34199.1	14782.9	63302.9	39319.6	25824.5	51416.9	45211	48400.7	54779.7	52791.3	40982.9	38690.8	71131.7	56140.1	44977.6
M285T557	4,4'-Dihydroxy-alpha-methylstilbene	285.113	557.151	108650	157921	171437	137359	129558	169507	196809	184345	173575	142912	139113	161808	144144	152722	89479.8	163866	156296	166200	148064	124274	156917	172416	151853	103755
M206T162	4-Amino-4-deoxychorismate	206.046	161.675	5139.4	75796.3	92804.7	217745	193465	114846	75168.1	117331	108283	43593.7	50601.5	78312.4	111864	295949	131248	8778.65	68034	183774	168771	55437.2	446384	77954.5	188011	112205
M206T178	4-Amino-4-deoxychorismate	206.046	177.611	59874.4	73297.3	86199.3	74801.1	70848	65316.6	75700.8	75434.3	76221.6	68455	117170	91728.2	69316.1	74454.5	69548.9	72313	67277.3	64298.3	72767.4	63843.9	77570.3	65456.6	64983.7	55702.6
M196T261	4-Aminobenzoate	196.062	260.527	6435.39	7696.84	8149.83	8591.6	9220.95	7500.09	13429.4	9781.94	9306.36	7260.72	7333.74	11380.5	8148.53	10087.1	11173.3	6831.97	8662.59	10019.6	9181.38	8418.44	10520.3	7699.38	8850.7	9027.91
M223T412	4-Coumarate	223.062	411.545	4416.49	4077.82	5360.67	4647.81	6014.84	6920.38	7990.31	4571.87	3117.71	8960.37	9078.77	8633.58	16187.4	3398.7	14068.7	9105.6	5431.1	7328.49	7893.69	12672.4	4947.73	5041.63	5313.13	10485.5
M327T437	4-Coumarate;Phenylpyruvate;2-Hydroxy-3-phenylpropenoate;trans-2-Hydroxycinnamate	327.087	436.645	279357	244763	253795	131646	128270	140431	253329	246102	237667	218045	246149	219275	187028	250952	150034	268713	254653	200173	190979	215351	217705	174763	209325	213849
M163T377	4-Coumarate;trans-2-Hydroxycinnamate	163.04	376.79	36364.1	21751.2	22975.2	24320	27282	46088.5	53685.8	27423	16456.8	33615.1	31702.8	37462.3	24414.4	24943	61651.6	12470.2	115138	23802.6	40099.3	29565.6	38580.5	29724.6	81257.7	352848
M107T303	4-Cresol;3-Cresol;Benzyl alcohol	107.05	303.168	13007.9	36949.3	45827.4	49066	33885.4	39967	32994.5	35902.4	38539.7	21868	28669.2	32574.1	45270.7	58805.4	36524.2	46178.1	28523.6	43830.3	33232.2	29747.8	55069	49074.9	37045.4	32642.1
M108T303_2	4-Cresol;Benzyl alcohol;Anisole	108.053	303.207	965.398	2695.85	3469.46	2657.64	2607.18	3286.34	2545.11	2667.42	2932.03	1710.8	2020.51	2487.36	3426.29	5060.53	2957.16	3757.59	2088.86	3536.01	2437.57	2284.54	4626.35	3904.88	2381.46	2840.44
M221T51	4-Hydroxy-2-oxoglutarate;(4R)-4-Hydroxy-2-oxoglutarate	221.024	51.42	15227.3	16178.1	13532.6	25532.8	16281.6	11592.5	20853	20098.5	18089.8	13245	22443.5	28611.9	21441.8	17785.2	11609.8	9792.51	16532.3	15834.8	11370.2	14139.5	18089.9	20503.4	17759.2	14728.4
M189T66	4-Hydroxy-2-oxo-heptanedioate	189.041	66.196	18112	20165	19660.8	19218.6	17372.6	16006.7	18378.4	18869.6	19821.1	21608.6	14611	24065.6	19717.6	21082.6	17938.8	18348.2	17644.2	19530.1	17606.8	17065	20054.1	19593.5	17991.9	31687.3
M189T52	4-Hydroxy-2-oxo-heptanedioate	189.041	51.869	17937.9	15048.5	14801.1	16106.4	15366.1	13231.2	19465.3	13254.1	15948.9	18858.1	28192.6	22032.3	14015	14353.1	19392.8	13179.7	11417.9	16113.5	16039.1	19308.6	42215.2	15082.4	20137.1	16454.9
M127T92	4-Hydroxy-2-oxohexanoic acid	127.04	92.204	1735.55	2107.21	1789.5	1972.59	2198.67	2148.67	2203.22	1714.2	2612.01	2283.31	1127.21	2881.71	1913.93	2955.57	2432.09	2692.49	2070.5	1621.1	2001.37	1827.92	1145.22	2381.89	1930.78	2724.85
M188T234	4-Hydroxy-2-quinolinecarboxylic acid	188.036	234.216	126167	157362	167678	181890	172394	169624	215378	196628	172198	158034	133274	221988	185925	215500	175168	196480	143879	206860	195235	174886	185295	169869	159129	141177
M160T385	4-Hydroxy-2-quinolone	160.04	385.057	4189.89	17330.5	21362.7	31466	26956.6	19274.3	14702.1	18883.9	16437.5	10173	11301.2	16954.2	19208.7	27162.6	19614.3	11389.4	10277	13791.6	17635.1	15961.2	28402.7	16745.1	22557.1	21958.7
M122T310	4-Hydroxybenzaldehyde;2,4,6-Trihydroxytoluene;Pentane-2,4-dione	122.033	310.418	2014.55	1747.53	2030.46	3339.14	2281.88	2264.75	2431.23	2306.83	1941.78	3758.88	2945.66	3606.42	4136.9	3954.56	4176.74	2071.02	2957.17	2577.14	3160.97	2310.58	2917.11	3879.42	4525.6	9354.88
M137T236	4-Hydroxybenzoate	137.025	235.634	3303.39	3651.63	5249.27	4063.8	3150.25	3603.4	4309.24	3960.42	3721.59	3440.82	3504.58	4477.84	3750.64	5032.06	3917.04	3212.01	3992.37	3785.26	4918.79	4179.94	5625.86	4017.5	4297.22	5562.23
M137T257	4-Hydroxybenzoate;Salicylate	137.025	257.399	4552.35	4610.94	10166	21579.5	8291.34	10132.2	9594.02	7080.94	5083.98	14881.5	20874.4	11778.1	16995.2	9586.85	41972.8	3860	13492.7	8987.74	17825	31128.2	32408.2	13639.1	33420.9	47689.4
M211T407	4-Hydroxyphenylacetate	211.061	406.944	29336.3	18974.6	21407.1	21439.2	25285.4	30754.3	28127	35105.8	15196.8	24286.8	14400.6	15121.3	11827.2	22320.5	17039.1	12919.6	12682.9	16475.1	16418.6	16626.7	15258.3	20041.3	13768.3	16228.4
M151T276	4-Hydroxyphenylacetate;2-Hydroxyphenylacetate;3-Hydroxyphenylacetate	151.04	276.442	30565.1	54642.7	185012	257763	100901	123528	79126.4	162263	176557	220792	338502	184943	257998	246710	239619	41116.1	247567	202882	100646	153050	178184	752567	314020	114654
M165T271	4-Hydroxyphenylglyoxylate	165.019	271.12	18571.7	19258.1	24353.4	22799.3	20295	19460.8	24735.2	22271.1	23105.5	21993.2	17125.5	27005.1	23041.1	27132.2	22527	22998.7	22863.4	21270.7	22159.6	24114.5	22758.8	28588.3	24215.7	29337.2
M181T324	4-Hydroxyphthalate;4-Hydroxyisophthalate	181.015	324.324	2802.01	2978.82	4002.57	2571.48	3194.03	2413.88	3953.03	4008.04	3166.33	3643.55	2792.97	3727.41	3643.37	3991.07	3210.05	3701.32	2704.88	3563.61	3403.24	3245.23	3483.68	4422.1	3154.82	5333.58
M119T375	4-Hydroxystyrene;Phenylacetaldehyde	119.05	374.832	3103.17	8753.05	15779.1	30692.1	27070.9	26211.9	26534.4	11427	11812.1	20484.5	25803.7	24043.2	23905.5	19522.6	29745.2	10271.6	31222.9	22467.3	36143.1	31433.3	41746.4	20587	31652	47250.2
M120T375	4-Hydroxystyrene;Phenylacetaldehyde;1-(4'-Hydroxyphenyl)ethanol	120.054	374.523	383.373	1095.17	860.894	1841.47	2147.23	2331.54	1868.56	1024.77	1202.69	2077.46	2087.3	2583.79	1742.79	2511.87	3865.93	1162.51	1964.76	2152.17	3170.26	2373.59	1265.7	2719.03	3282.79	4697.98
M139T265	4-Methylaminobutyrate	139.059	264.793	1143.82	1382.1	1360.91	1640.35	1620.03	1940.12	1515.07	1903.75	1288.3	1691.44	1497.83	1386.78	1105.62	1144.73	1304.29	781.208	1268.28	1050.79	1501.26	1841.45	1197.5	1207.21	1163.41	1651.41
M182T100	4-Pyridoxate	182.046	100.395	140754	210633	237945	211669	236905	226551	232114	330657	209883	226838	17560.7	233592	214055	268947	216204	202875	209526	239380	207305	196527	13942.7	192577	225397	216306
M158T140	5-Acetamidopentanoate	158.082	140.381	4664.02	12555.1	13999.1	11342.9	10122.1	13191.1	7900.89	14128.3	10125.4	9020.76	13047.1	8681.68	16841	14416.4	9957.37	5341.48	9726.54	13671.7	7375.11	8340.1	10900.2	18619.1	11646.9	12653.5
M145T52	5-Hydroxy-2,4-dioxopentanoate	145.014	51.5295	10413.9	13497.8	12018.9	8786.1	13863.4	16500.4	14469.7	16744.8	8746.56	18496.2	12851.7	33475.7	32523	15577.1	27758.3	36250.8	12764.5	9885.82	13695	16100.1	29279.5	29433.5	17027	92235.1
M128T75	5-Oxoproline	128.035	74.981	29042	36919.1	30120.6	25548.8	18853.9	22507.5	31579.4	52016.5	29698.9	18640.2	5788.2	24130.3	40865.4	32619.5	29105.9	96074.5	31901.8	39983.9	29878.4	25458.5	2426.97	35667.9	31263.5	71016.7
M276T97	7,8-Dihydroneopterin	276.066	96.8915	12218.2	6555.43	10082.8	8944.82	10304.4	10616.2	12677.7	14334.5	11326.7	7510.34	5935.86	12020.2	15046.1	8717.52	11052.6	7221.57	10112.7	11375.2	8789.5	6943.7	5479.71	9485.39	9498.89	10046.5
M383T312	7,8-Dihydroxanthopterin	383.092	311.812	91488.2	36710.5	42312.2	32568.9	25469.9	30448.8	43253.3	45229.1	38826	72196.7	36189	57085.5	22910.6	29624.5	33667.6	26739.9	29789.2	30799.1	57323.8	72436.9	30774.2	22762.4	37464.6	25911.9
M134T162	Acetanilide	134.061	161.913	112.081	1125.53	1354.1	2990.54	2676.7	1730.65	1141.56	1641.2	1589.09	707.889	647.874	1221.56	1734.62	4389.59	1807.61	276.577	915.151	3021.88	2001.52	656.871	6252.58	1102.03	2712.32	1516.95
M145T178	Adipate	145.051	177.597	7175.92	15438.1	16365.3	13381	13848.8	10157.3	12161.4	17835	12165.7	9814.99	10126.6	15615.9	28354.7	30079.3	18265.8	23292.7	9051.28	11379.9	12044.9	10818.2	14163.8	14499	13273	33159.4
M146T178	Adipate	146.054	177.615	533.098	1136.85	1139.01	1110.92	1105.13	889.402	821.304	1482.91	983.074	818.021	656.453	994.766	2325.33	2658.42	1318.52	1897.21	498.962	1050.11	971.04	788.242	1352.23	1037.07	1054.03	2751.17
M261T209	alpha,beta-Didehydrotryptophan	261.089	209.148	5754.93	7587.64	8035.76	10696.9	8154.49	5441.99	7725.37	7073.33	8439.32	6208.19	6814.78	9322.73	9409.93	13940.5	11080.4	7284.76	8749.82	10859.5	12135.9	9797.11	13417.6	10639	9930.32	12890.1
M175T237	alpha-Isopropylmalate	175.061	237.166	4290.27	13688.7	23804.4	29578.6	16313.1	13763.5	30232.9	23146.9	12980.6	25488.3	20271.7	24971.6	27208.4	26066.1	56294.4	22909.3	20677.2	19133.6	20573	29632.9	67191.5	19290.3	58587.2	135520
M107T277	Anisole;4-Cresol	107.05	276.59	3263.65	5016.07	14665.4	20209.7	8238.22	9839.06	6645.81	12711.7	15248.6	18748.4	26723	14206.3	20401.1	20465.2	18882	3324.41	21417.7	17256.8	8392.56	12685.9	14768.8	53198.2	23731.2	8435.93
M273T335	Anthranilate	273.089	334.894	14145.9	9978.76	13419.4	9768.46	10403.5	9786.88	11600.5	8437.26	7291.45	9453.64	12397	15611.4	10484.1	9104.94	17086.6	8680.12	11309.9	13365.7	12538.9	13476.5	15140.4	10788.6	14683.2	43782.6
M303T1055	Arachidonate	303.233	1054.95	165504	481231	472513	493910	538818	742705	415723	472119	676535	880027	847950	548321	853457	495787	537344	475557	854563	513177	441906	519903	479691	661160	413647	370380
M274T458	Benzene-1,2,4-triol;1,2,3-Trihydroxybenzene	274.044	457.884	1899.85	3258.89	3418.85	960.458	2991.01	4558.01	2253.31	10305.1	2625.03	5697.72	2105.43	1588.98	563.721	1325.26	1409.41	427.137	1743.84	528.269	562.049	504.862	655.153	1671.44	1620.9	2575.48
M209T391	Benzyl acetate	209.082	390.74	19280.2	29606.3	34031.1	47394.6	56038.4	30336.3	30529.4	23075.4	25797	20318.1	21398.7	26321	33237	50804.2	16786.8	29632.3	22436.1	36226.9	21698	15651.9	29052.4	36131	16335.2	25466.7
M391T705	Chenodeoxycholate;Deoxycholic acid	391.284	705.137	3.9962e+06	511006	651618	480171	1.0203e+06	1.56163e+06	607016	2.09287e+06	3.88659e+06	1.69441e+06	1.31984e+06	1.75091e+06	1.92276e+06	2.22109e+06	1.57827e+06	3.76584e+06	2.09988e+06	2.16136e+06	2.34271e+06	1.2848e+06	909465	2.50662e+06	589553	704873
M391T790	Chenodeoxycholate;Deoxycholic acid	391.284	790.5	5.8743e+06	4.98679e+06	5.92191e+06	6.88132e+06	4.42601e+06	5.76331e+06	3.22123e+06	6.50513e+06	4.91022e+06	5.03071e+06	4.91961e+06	3.67067e+06	4.37131e+06	5.04701e+06	3.68926e+06	4.04431e+06	5.12018e+06	4.07267e+06	3.23233e+06	3.93332e+06	2.36556e+06	5.7102e+06	3.87586e+06	2.71436e+06
M465T1196	Cholesterol sulfate	465.303	1195.83	23276.6	13116.9	10129.1	12860.4	19657.3	20193.6	11213.5	20468.4	23378.1	14724.6	13292.9	10851.9	8988.85	10492.2	9850.07	10298.3	27901.4	15400.5	14803.5	16479.1	9983.1	8121.73	11754.6	11427.6
M465T1031	Cholesterol sulfate	465.311	1030.99	2415.69	2165.48	2838.71	2843.03	3672.9	2885.54	3023.21	1620.28	3888.72	3807.54	3912.3	4283.34	3468.54	4487.97	6180.52	2141.61	4330.93	5303.76	4866.6	5097.82	4761.96	2692.03	4062.55	5219.88
M407T619	Cholic acid	407.279	618.833	2.14458e+06	2.01407e+06	2.27146e+06	2.0069e+06	503188	1.16243e+06	585794	2.44197e+06	2.02484e+06	2.53666e+06	2.00667e+06	1.07267e+06	1.53235e+06	1.47239e+06	780750	959448	2.95861e+06	1.00323e+06	279744	391710	741601	2.09085e+06	1.1388e+06	790563
M407T562	Cholic acid	407.279	561.862	398649	225164	256580	266402	115182	247960	120002	480070	356239	303029	207774	126789	127606	206526	111147	122903	244852	168098	62198.3	74621.2	49934.3	197387	93344.5	50976.6
M301T496	cis-4-(1'-Hydroxynaphth-2'-yl)-2-oxobut-3-enoate;4-(3-Hydroxy-2-naphthyl)-2-oxobut-3-enoic acid	301.072	496.148	94481.8	154711	163443	72885.2	52028.7	107858	85598	336116	124094	202288	91534.1	73799.2	29883.1	53334	61215	20405.5	85762.3	35517	30519.1	46478	22346.4	68312.1	76779.4	36182.7
M302T496	cis-4-(1'-Hydroxynaphth-2'-yl)-2-oxobut-3-enoate;4-(3-Hydroxy-2-naphthyl)-2-oxobut-3-enoic acid	302.075	496.069	16786	28716.9	32240.2	14362.9	10614.2	22429.4	15100.6	69477.3	23574.9	38985	16749.5	14913.7	5238	10330.1	13003.1	4688.61	17418.9	7443.36	5097.67	8989.75	4220.69	13433.3	14921.8	6478.01
M147T85	Citramalate	147.03	84.5985	8011.25	17613.9	21185.8	27598.7	15312.7	16628.7	21647.8	19402.5	19539	15633	2664.92	18072.5	76982.1	33326.2	43800.8	148316	13879.4	20387.8	17126.4	17270.4	5189.38	38223.4	38544.5	133207
M191T69	Citrate;Isocitrate	191.02	68.832	26315.2	85421.7	106649	121946	48616	42194.6	160039	116896	31700.8	47298.3	54811.4	70137.6	48778.3	129009	165352	35902.8	73257.1	47893.1	67418	54629.6	20906.7	53626.3	156814	1.84028e+06
M653T684	Coproporphyrin III	653.261	683.956	20711.6	24402.8	28354.4	28501.5	18468.6	19787.6	26716.7	28074	22435.9	16668.9	12518.6	15779.6	9456.03	23098.7	15650	10066.1	15376.2	20307.9	14949.4	13947	16600.1	11031.7	13994.1	22837.1
M159T390	Cyclohexanol	159.103	389.649	13069.2	12898.4	16270.2	14425.4	15010.1	15247.1	15518.4	13338.1	16179.5	14328.9	14387.6	17411.9	18259.6	16862.9	16797.4	15923.8	15359.4	15140.6	18474.8	18057.4	23236.3	15727.5	15483.2	15201.9
M321T79	D-Arabinose;D-Xylose;D-Lyxose;L-Lyxose;D-Ribose;D-Ribulose;D-Xylulose;Xylose;L-Arabinose;L-Xylulose	321.083	79.4485	299408	446328	440689	408099	358894	342731	343605	272905	424697	121782	143163	508265	220843	382928	246453	213504	238234	417597	299493	315212	103002	321547	258193	147670
M132T46	D-Aspartate;L-Aspartate	132.03	45.732	34073.4	53342.1	51124.2	26214.9	22679.5	32051.3	37038.7	68185.1	23363.9	22708.6	44261.9	26585.7	50517	18931.1	14141.3	47105.3	39142.7	34530.1	14417.9	17798.3	8601.96	43794.9	38523.3	15469.1
M272T85	Deoxyadenosine	272.079	84.868	40781.9	39831.8	35041.3	39349.1	29514	28612.1	31311.3	39236.5	41681.3	31889	16362.9	48453	18424.7	44560.2	33061.3	39820.3	26954.2	28841.7	36323.9	37811.8	17746.9	4742.38	37244.3	29323.6
M391T909	Deoxycholic acid;Chenodeoxycholate	391.283	909.448	13484.5	5055.15	7687.25	13431.8	3926.59	11076	11416.3	11910.1	8641.17	8246.78	6527.97	3363.76	11526.1	4014.89	3019.44	11636	8165.19	12543.1	10087.7	3465.63	3998.85	4857.05	4990.63	12364.6
M266T102	Deoxyguanosine	266.09	102.391	25491.9	40647.4	51620.4	23281.5	25336	44647.8	44597	40950	24780.9	29783.3	2417.5	1149.57	200380	40970.8	45711.5	66111.6	34154.7	29633.3	20620	25243.6	6033.61	97247.6	24663	51939.6
M251T103	Deoxyinosine	251.079	102.88	22094.6	54474.7	58794	20664	30261.7	61789.5	58578.8	30705.5	18060.5	48998.5	5016.57	24084.9	556722	45860.7	45670.2	291695	75535.6	44359	16407.2	20065.9	6237.24	259891	42405.3	131764
M160T70	D-Glucono-1,5-lactone;2-Dehydro-3-deoxy-D-galactonate;2-Dehydro-3-deoxy-D-gluconate;D-Galactono-1,5-lactone;D-Galactono-1,4-lactone;L-Gulono-1,4-lactone;L-Galactono-1,4-lactone;2-Dehydro-3-deoxy-L-galactonate;2-Dehydro-D-glucose;D-galacto-Hexodialdose	160.033	69.791	1675.07	2121.14	1938.27	688.385	1373.23	1972.03	1728.02	2062.86	1893.8	2328.13	2132.14	2208.39	1593.98	1861.78	3005.95	1642.38	1773.62	2114.91	1740.31	1909.91	3019.56	3935.85	2410.63	11774.9
M162T52	D-Glucose	162.049	51.755	8764.08	13628.2	17208.7	15233.9	17069.5	12108.9	17924.1	10633.1	17575.7	11374.4	12569.4	22171.5	13994.4	18558.8	18740.3	13759.3	12208.6	13194.8	15894.8	16156	20574.2	15631.4	10307.6	15438.1
M179T47	D-Glucose;D-Mannose;alpha-D-Glucose;beta-D-Glucose;D-Galactose;L-Galactose;D-Fructose;alpha-D-Galactose	179.056	46.794	120403	188194	249734	266756	270999	171735	254931	108855	112135	167478	315849	224918	526023	146177	382819	153268	169020	132778	259154	314381	357807	113078	345870	518370
M168T77	D-Glutamate;L-threo-3-Methylaspartate;3-Aminopentanedioate;L-Glutamate	168.024	76.894	6823.61	9540.66	6216.58	5533.03	9361.29	10811.9	11913.6	15759	21364.3	14257.4	2803.27	9512.92	9938.05	9507.55	4971.22	5674.45	16552.7	13162.3	6712.26	5108.69	2553.49	6604.16	8055.43	18094
M89T63_2	D-Glyceraldehyde;L-Glyceraldehyde	89.0243	63.314	145847	145346	227739	262877	166471	402464	310530	164026	159410	304664	195753	208096	439317	182530	822237	319412	370472	249226	472963	582073	379775	558947	409848	1.28648e+06
M161T51	D-Mannose;2-Dehydro-3-deoxy-L-rhamnonate;2-Dehydro-3-deoxy-D-fuconate;D-Glucose;beta-D-Glucose;D-Galactose;L-Galactose	161.046	51.3255	118880	227809	249291	269028	272168	231806	246359	198958	232663	221561	197170	283558	186382	275812	242290	200582	186757	148548	241746	220326	259973	238563	226369	127773
M339T1345	Docosanoic acid	339.327	1345.48	1762.09	1589.79	1274.52	1331.94	1515.82	1854.56	989.055	2400.38	2045.81	1653.59	1414.93	1596.82	953.838	1683.72	1486.28	1094.93	1535.94	1743.71	1813.17	1654.92	1451.06	1245.95	1791.96	1156.57
M150T113	Dopamine quinone	150.056	112.712	2614.69	6529.17	9479.61	14419.7	8841.61	7508.39	7042.78	8496.55	9185.2	7472.78	5458.56	7655.56	7264.47	20208.6	6667.19	5114.71	9896.46	24961.6	13860.2	7203.57	24186.5	9929.49	14919.4	7713.24
M176T126	Dopaquinone	176.036	126.14	4865.46	27320.4	35010.2	52777.3	34147.4	31110.7	19370.7	28709.8	43892.8	21970.9	22623.6	30684.9	12675.6	57596.8	53697.3	9875.73	33379.1	56973.9	41262.5	32990.4	24066.8	41185.6	33446.9	103847
M201T62	D-Psicose	201.04	62.301	12704.5	17082.1	17612.4	18986.5	12846.4	28237.5	10598.2	8469.67	16519.7	6237.72	4866.69	16710.7	31401.5	11228.6	63781.1	23732.6	30016.5	19627.1	32186.6	22029.9	7605.72	39631	23036.9	84673.2
M226T46	D-Ribonate;D-Xylonate;L-Arabinonate;D-Arabinonate;L-Xylonate;L-Lyxonate	226.065	46.169	9172.7	6665.83	7054.48	6882.15	8189.14	6448.15	9566.49	3265.93	8076.27	3369.08	8840.88	5080.99	19768.1	7732.23	9661.06	4680.32	1434.33	9219.42	6288.39	9802.62	11857.5	6129.9	9962	11020.5
M149T48	D-Ribose;D-Xylose	149.046	48.279	10628.7	16995.3	19121.6	22245.7	27694.5	24259.6	20602.7	14100.5	14028.3	14738.5	19760.9	20601	60142.7	20832.7	48169.7	49557.2	22765.4	17120.6	46303.3	67881.5	31378.1	41485.9	24414.2	65662.9
M337T1275	Erucic acid	337.311	1274.69	500.237	897.689	723.545	589.156	2166.84	1141.58	831.492	2023.25	1120.62	702.966	775.199	1074.08	595.358	1824.13	933.72	735.129	1065.52	1227.23	1348.61	1174.56	581.934	600.016	962.299	671.314
M271T473	Estradiol-17beta	271.164	473.181	18477.1	15139.5	14478.7	22487.8	11375.9	32683	12428.3	18994.3	15432.4	24599.7	7977.71	22500.9	9064.56	10671	13617.4	9552.56	11627.5	26449.6	10603.2	11919.5	17633.8	10523.5	19328	26618.8
M164T384	Formylanthranilate	164.036	384.26	3448.84	4850.02	6359.37	4601.62	2911.31	10712.9	4638.29	7628.02	4285.21	6709.83	10272.3	6346.46	6640.56	6299.32	10839.3	5067.92	6429.74	5198.28	6936.99	6749.68	6093.7	6871.41	8295.37	28494.1
M277T114	gamma-Amino-gamma-cyanobutanoate	277.087	114.497	189480	67494.7	94979.2	71671.6	34744.3	41028.3	95316.1	61842.8	81473.8	48173.5	30279.9	52463.6	40967.2	67187.3	42204.6	49906	69380.3	35919	51474.1	74454.5	27310.7	35487.3	46464.2	46675.2
M197T303	Gentisate aldehyde;3-Hydroxybenzoate;4-Hydroxybenzoate;Salicylate	197.046	303.17	2968.78	6436.38	8425.38	6490.83	7328.56	7727.26	7101.23	7880.92	6890.5	3781.5	6022.63	6934.41	9517.36	14403.6	8062.12	9863.91	5961.84	8476.84	6925.29	6475.79	11584	9858.65	7329.55	6837.7
M131T106	Glutarate	131.035	105.995	20572.6	34236.4	35658	30256.2	22036.8	29157.3	22546.8	35490.1	55132.1	23884	27705.3	38796.4	114469	84718.8	51236	70446.6	18437.2	34349.6	37121.8	33955.3	40376.1	52369.4	31729.6	61076.6
M282T94	Guanosine	282.085	93.685	17783.5	17313.5	29974.2	21261.8	13910.2	24444.2	17159.4	19484.2	9441.89	17274.7	5674.44	18315.7	146336	41596.9	39071.1	65943.3	19656.4	20129	22853.1	18288.3	4934.68	38253.5	9831.27	33075.7
M255T1106	Hexadecanoic acid	255.233	1106.21	224849	230615	149324	148285	166417	239908	156829	314157	245858	155557	179859	157637	133083	200757	144084	199378	192633	232587	202058	163760	217049	201545	226151	171302
M178T279	Hippurate	178.051	278.565	12467.5	6944.56	11579.3	7394.48	5404.42	178332	16630.7	6240.87	1788.61	5204.41	4953.51	60242.6	5765.04	6102.46	669404	6832.99	78462.1	4620.87	11307.7	9723.53	16909.1	20000.1	312452	2.80187e+06
M227T251	Homogentisate;2,6-Dihydroxyphenylacetate	227.056	251.036	4336.58	5295.64	5844.52	13303.7	7407.26	7107.81	9597.37	5624.89	4896.47	12479.6	17479.8	13728.8	9623.42	6256.75	35338.3	5659.37	7807.02	6449.2	17483	19759.5	21022.7	5506.24	32102.8	14086.7
M307T1151	Icosadienoic acid	307.264	1150.6	4997.53	3123.34	2646.42	4947.5	3196.6	6250.04	2448.28	5271.45	4100.57	4015.88	3253.53	4301.63	3092.04	2638.23	2786.31	5102.45	7083.06	8955.02	6470	7924.97	6590.53	3331.69	5374.46	4038.92
M311T1270	Icosanoic acid;Phytanate	311.295	1269.54	2147.58	2228.91	1552.95	2196.53	1685.53	2386.37	2033.87	2674.85	1876.65	1812.76	1865.88	1818.61	1643.17	2464.24	1743.97	1957.33	1630.8	2287.8	2162.02	1583.22	1582.84	1209.62	2268.23	1637.2
M309T1201	Icosenoic acid	309.28	1201.38	2683.38	3240.53	2737.97	2189.29	3409.33	3930.27	3523.81	4974.24	5033.15	2304.17	3269.5	3445.84	3305.82	6443.8	3796.54	2855.29	4796.94	5193.78	4965.81	4563.42	3400.36	2792.12	4274.91	3107.18
M116T342	Indole	116.051	341.782	1234.59	1779.88	2541.25	3393.18	2500.12	2704.82	2469.54	2330.48	2270.53	1229.26	1731.6	2212.49	3007.91	1525.69	2871.72	563.292	1352.48	1481.57	1994.7	1788.8	2184.78	2201.89	4334.91	2381.5
M174T442	Indole-3-acetate	174.056	442.278	4822.08	17922.6	19377.5	13044.4	8923.48	13321	7773.65	15495.8	19242.6	9250.89	13430.6	9703.22	35129	16174.7	19267.7	16952.4	6462.31	8737.65	6599.45	11064.1	13675.2	34997.4	20891.2	13964.3
M220T323	Indole-3-carboxylate	220.062	323.28	14524.4	13681	30221.9	15074.4	19552.9	11010.7	18204.1	12991	9986.09	13455.1	15383.8	21045.8	18585.3	26338.6	28349.3	8004.74	11098.1	10927.1	18278.2	21642.2	11992.2	12562.4	17600.2	28613.9
M206T246	Indole-5,6-quinone	206.046	246.232	9404.85	16173.8	17391.2	18545.3	19542.2	16360.8	19445.3	17457.4	17643.9	16286.7	16371.8	21845.6	17608	16011.4	16555.2	16210.8	14177.3	14329.8	20749.2	15568.6	16419.5	16378	15415.2	16648.7
M204T394	Indolelactate	204.067	393.875	3632.66	4667.62	15497	55074.4	12317.1	20205.5	19063.7	7494.99	12544.5	58968.9	50157.8	74788.3	42921.2	19864.5	96256	7215.04	33938.9	11879.6	32370.2	40856.7	52616.2	103207	94831.6	250990
M192T358	Indoxyl;Indolin-2-one	192.067	358.127	4196.44	5138.28	5482.52	7011.28	7416.2	6217.66	7372.14	6435.23	6018.24	6616.92	5709.91	8244.59	10265.9	7280.89	8249.35	6190.42	4779.23	6779.44	6773.8	6036	7868.37	6677.31	8646.88	11692.9
M267T93	Inosine	267.074	93.452	53688.1	150122	277517	133693	87340.8	228971	114416	77360.3	50130.4	122409	10187.6	93120.9	829041	387657	264550	867840	200041	150528	102533	105292	12093.4	144115	80219.7	162675
M173T52	Isocitrate;Citrate	173.009	51.5545	6347.76	4671.37	7529.27	2255.96	2891.75	12624	12964.3	6298.89	4853.95	5929.79	7234.56	6397.42	13156.2	5250.36	41031.2	2798.69	9841.78	4845.95	5863.01	4639.19	6256.96	4659.46	17689.2	362959
M255T500	Isoliquiritigenin	255.067	500.484	5423.14	12582.6	10836.1	10292.4	19559.9	21288.7	13928.5	13919.2	12570.7	12535.6	19321.6	11836.9	68206.9	20604.7	55900.7	61159.5	21135.7	32187.2	32779.5	41015.4	24890.7	37091.2	16450.6	26361.1
M116T62	L-2-Amino-3-oxobutanoic acid	116.035	61.91	9082.32	13275.9	15631.3	13733.4	3564.95	29306	4727.29	27001.1	13063.7	11436.7	14393.5	14947.2	13403.4	5990.34	16322.7	7692.76	25752.2	10362.8	9819.54	10939.8	8790.57	12249.2	23463.7	36454.3
M165T46	L-Arabinonate;D-Xylonate;D-Arabinonate	165.04	46.42	14763.8	5947.69	5118	6479.54	4720.96	6139.11	7521.75	14460.9	15132.4	5964.71	6576.09	6083.53	6818.56	11260.4	21554.1	12024.1	8862.44	7749.96	19296.4	6743.59	9618.65	5304.15	11948.3	62572.9
M225T46	L-Arabinonate;D-Xylonate;D-Arabinonate;D-Ribonate;L-Xylonate;L-Lyxonate	225.062	46.2825	47827.7	90933.7	119074	102426	99723.2	72986.5	114422	44725.9	42672.7	64237.2	153736	70337.1	279094	49906.8	126975	59857.5	72324.5	41231.1	90969.7	128999	146210	38576.3	115205	138856
M322T80	L-Arabinose	322.086	79.9355	63323.7	70954.8	77528.7	73735.9	68936.2	60308	50392.2	30507.8	65033.1	42364.8	19902.2	64149.9	47235.1	75263.8	39796.4	49046.1	45392.4	39880.1	50685.7	53774.7	23297.3	52881.2	50704.9	31130.6
M325T85	L-Arabitol;D-Arabitol;Xylitol;Ribitol	325.113	85.0735	28135.5	27306.4	31055.6	27019.6	26995.2	18742.8	5578.49	45483.5	15524	25260.5	19253	28751.4	26400.7	27636.2	41668.6	20548.8	17144.2	18931.6	31803.8	31635.3	23901.8	52493.2	31326.4	21869.9
M252T102	L-Dopachrome;D-Dopachrome	252.052	102.289	8607.91	8457.18	8508.39	6925.91	5508.67	4969.4	7525.28	10996.5	9602.06	9662.94	3320.41	8127.28	87678.2	8536.66	9602.97	9380.05	4632.98	8212.76	5750.08	5723.09	6876.88	7025.99	8206.89	19839.3
M159T71	L-Galactono-1,4-lactone;L-Gulono-1,4-lactone;D-Galactono-1,4-lactone;D-Glucono-1,4-lactone;3,6-Anhydro-L-galactonate;D-Glucono-1,5-lactone;D-Galactono-1,5-lactone;2-Dehydro-D-glucose;D-galacto-Hexodialdose;2,4-Diketo-3-deoxy-L-fuconate	159.03	70.78	31366.5	40945.5	44986.2	38786.8	38021.5	39558.5	41443.2	41473.3	42052.9	46244.6	35090.8	53585.7	43789.2	44398.5	54572.1	35673.4	31323.3	38194.1	44916.3	56297	17298.4	46834.6	47883.8	176308
M239T50	L-Galactose;D-Fructose;beta-D-Glucose;alpha-D-Glucose;alpha-D-Galactose;D-Glucose;D-Mannose;D-Galactose	239.077	50.322	56562.5	68616.1	115954	46964.7	76252.8	87865.8	128944	70339.7	41845.8	69966.6	109194	68908.5	179329	56249.5	114491	121298	57274.1	41741.6	79237.3	105419	48056.2	60408.5	72288.5	55466.5
M128T47	L-Glutamate	128.035	47.145	6516.14	5680.25	6392.93	4021.37	5555.05	9376.37	4767.34	8532.46	13876.3	8075.27	21225.8	6459.01	16181.3	9601.55	6652.58	32891.9	6390.38	10871.2	5562.48	4228.1	16952.3	18425	5798.14	3293.48
M237T48_2	L-Gulono-1,4-lactone;L-Galactono-1,4-lactone;D-Galactono-1,5-lactone;D-Galactono-1,4-lactone;D-Glucono-1,5-lactone;3,6-Anhydro-L-galactonate	237.064	47.9735	36210.3	45091	48045.4	52028.1	50410	43076.1	46902	40341.1	47525.6	43777.2	43964.4	55868	60680.3	54570.4	45981.6	43725.4	40035.6	46413.1	53596.3	47356.2	51455.3	43022.7	44801	50982.2
M279T1062	Linoleate	279.233	1062.39	227644	865063	1.0104e+06	1.02921e+06	942114	1.07207e+06	1.08888e+06	740809	1.10041e+06	1.10191e+06	1.1107e+06	1.39442e+06	681533	1.33464e+06	1.5899e+06	671626	1.58981e+06	1.3638e+06	1.30461e+06	1.28527e+06	1.51627e+06	1.01416e+06	1.09622e+06	1.20941e+06
M375T931	Lithocholic acid	375.29	930.542	334205	291734	355783	457446	392305	446078	274914	381550	520185	571530	399959	481221	393833	577000	351595	285475	502148	522973	413265	364187	391379	433673	380781	362689
M164T115	L-Phenylalanine	164.072	114.516	52438.1	109873	132501	114549	92318.9	159012	142560	118885	138062	101070	240752	120178	629095	111711	122000	198231	202215	83053.5	114384	118408	84006.9	377559	143253	124720
M180T47	L-Rhamnonate;D-Fuconate;L-Galactose;L-Fuconate;D-Glucose;beta-D-Glucose;D-Galactose;D-Fructose;alpha-D-Glucose;alpha-D-Galactose	180.06	47.2205	9109.32	14000.1	24385.9	21426	24360.3	13877.8	22919.3	7090.94	9976.33	12250	24248.3	18958.6	42334	13549.1	33078	13273.4	13434.8	10294.5	22499.4	25894.2	24467.5	7644.48	27073.3	41887.1
M203T196	L-Tryptophan	203.083	196.052	48279.7	68187.3	107085	112756	69639.4	98353.9	84876.9	79809	89671.5	88897.4	104107	116582	347825	156920	128986	91589.8	110860	92190.4	102086	78457.8	102582	240565	178512	128446
M180T85	L-Tyrosine	180.067	84.5985	67603.6	84796.7	96870.1	50614.6	72531.9	97258.5	63956.4	88409.6	126772	62496.4	8980.99	68473.7	333009	77598.1	41111.5	121405	96880.2	67354.6	46317.7	35502.3	23823.6	189753	68502.2	26868.1
M223T477	Lumichrome	223.062	477.012	3212.03	3091.12	3554.47	3127.04	5105.46	4811.22	3267.1	7272.31	3894.89	4404.14	3437.8	3421.57	2269.76	3747.3	3265.47	3083.84	2064.04	2865.67	2767.98	3392.8	2639.2	3032.92	2033.06	3502.72
M188T510	Methyl (indol-3-yl)acetate	188.072	510.264	2639.64	9125.98	12988.6	5593.81	8168.43	11746.7	5697.39	9119.56	10322.8	4599.98	4873.6	4473.23	33872.2	12901.4	5225.11	23596.4	6635.97	12062.3	3526.08	3171.31	6173.82	25319.3	6012.4	4143.33
M248T395	Methyl (indol-3-yl)acetate	248.093	395.261	5083.33	5828.96	6298.83	7678.91	10200.1	9423.6	7856.25	10542.3	11467.9	8259.89	8131.74	14796.7	17337.2	15008.2	17601.1	10142	9187.68	16844.8	13044	12694.8	15652.1	10934.6	11233.7	14252.7
M413T931	Murideoxycholic acid;Hyodeoxycholate;Chenodeoxycholate	413.264	930.544	13529	11698.2	20280.1	19711.9	14489.2	18271.4	8483.59	11902.5	19091.3	22261.4	15789.8	21978.2	13816.2	19360.6	12978.4	10644.8	25704.4	26535.9	13352.4	13724.9	14493.9	14819.8	9979.49	14431.9
M281T1125	NA;(9Z)-Octadecenoic acid	281.249	1124.68	132445	212159	199367	332190	217515	341245	158289	318195	321167	223728	238006	292396	185694	263954	258983	254729	421772	333534	310804	320001	370877	298455	279893	216295
M174T66	N-Acetyl-L-aspartate	174.041	66.499	54007.1	143614	318730	121172	101668	106966	103034	141815	207610	209962	138490	170917	249939	234543	242731	276710	263767	118793	57154.1	58050.2	35108.2	122356	125321	198957
M170T84	N-Acetyl-L-glutamate	170.046	83.943	39231	55508	48505	40885.8	35488	16822	44138.8	75860.8	50631.7	31340.3	8513.05	32285.3	18926.7	19551.9	12377.7	29764.9	26672.8	20784.6	18033.3	20305.4	9103.07	10969.2	31489.3	27000.2
M172T344	N-Acetyl-L-leucine	172.098	343.699	6867.25	13989	13232.4	9725.48	5837.84	16268.1	7646.7	13422.2	13140.3	8872.19	25316.1	8952.35	30207.4	17878.3	27207.5	35316.6	12603.3	10873.2	5839.7	5771.65	5606.5	14476.1	16222.8	127900
M172T329	N-Acetyl-L-leucine	172.098	329.16	4525.12	13218.9	10231.7	8814.03	5833.78	11541.5	8954.66	12289	12749.5	8645.27	9233.82	7106.87	23270.8	14145.4	17930.5	23287.8	8395.44	7652.44	5031.73	4675.54	7337.78	10638.7	13482.3	73548
M206T380	N-Acetyl-L-phenylalanine	206.082	379.688	8234.08	10282.2	11941.5	10169.3	9508.76	11695.6	10069.2	11425.9	15997.5	12378.7	14743.2	11227.4	28968.9	14121.6	13270.9	20247	11442.8	10309.7	10340.3	9971.08	11518.3	14483.7	16294.5	17434.9
M308T459	N-Acetylneuraminate	308.099	459.462	32406.7	43389.2	32896.6	22600	33676.5	32123	35912.5	24388.7	32704.6	32523.6	103323	36028.3	26870.3	117492	25933.7	27562.9	34349.9	36335.9	34482.7	81976.4	33661.1	148131	35418.5	151661
M190T342	N-Benzyloxycarbonylglycine	190.051	342.014	235620	1.53212e+06	1.7602e+06	2.09085e+06	2.14034e+06	1.76673e+06	1.67327e+06	1.58542e+06	1.21477e+06	980846	1.62778e+06	1.61968e+06	1.71655e+06	1.74271e+06	1.76569e+06	497188	1.03878e+06	722517	1.31889e+06	1.30671e+06	1.50244e+06	1.12441e+06	1.68818e+06	1.52273e+06
M504T83	N-D-Ribosylpurine	504.165	82.7015	18668.5	17151.7	24752.3	23770.3	13769.1	14271	14886.7	11175.4	19547.7	12005.9	6946.77	23019.4	31494.7	26719.3	27133.9	20865	18126.2	22457.4	23846.9	17940.5	10045.5	23165.1	19487.4	17896.3
M234T70	N-Formyl-L-glutamate	234.056	70.102	12939.1	14152.7	14301.5	12176.9	10651	12436.9	13343.1	15635.9	13641.4	14075.7	10724	16462.4	5743.3	15887.6	12978.4	6737.75	9802.71	14252.6	11852.1	10561.5	10049.2	9736.38	13284.5	8123.12
M314T357	Nicotinamide-beta-riboside	314.107	356.757	51234.7	65367.3	67046.2	82786.5	81298.1	78511.3	77766.3	98082.1	81920.5	74560	65884	84679.1	81585.8	89951.3	66626.6	80565.8	72685.9	100210	79371.4	70675.5	68605.4	79491.5	65211.1	62865.3
M122T69	Nicotinate	122.025	68.964	40886.1	50933.6	55829	25437.5	23456.7	37423.6	31988.2	54425	52758.9	35119.9	14299.2	34748.4	77802.8	47766.1	19307	111977	34250.8	37175.6	21130.6	23846.1	14525.1	52513.6	40987.3	24840.7
M301T372	N-Methylanthranilate	301.121	371.933	12808.5	12723.7	12003.5	16233.2	13282.3	14609.9	12930.2	17210.6	17509.7	15415.7	11128.9	16831.6	11902.5	17948.4	14563.8	13751.6	15174.7	13737.5	17015.9	14019.8	13564.1	14249.9	12174.8	10560.5
M227T156	N-Methyl-L-alanine	227.104	156.481	81479.9	114364	112549	103153	89553.3	87231.1	106956	106900	107426	92022.9	80544.8	116585	92687.6	125383	93759.6	90571	85579.4	111011	105075	90485.5	120925	112072	98344.8	108909
M246T86	N-Succinyl-L-glutamate	246.062	86.1	11376.4	18200.6	19258.8	14474.2	14018.3	14489.2	15702.8	18838.2	15438.9	16140.6	6726.79	11388.6	19702.2	19421.3	12894.5	15394.9	11198.3	8073.06	18360.7	15634.7	8372.9	15106.6	6528.93	16568.4
M283T1192	Octadecanoic acid	283.264	1191.75	111954	76980.2	64895.7	73402.2	63906.1	98550.3	70936.2	89438.7	77060.4	74033.2	71056.8	58427.8	50729.7	61982.5	55045.4	79325	82572	81003.2	65002	58080.4	84311.1	61950.3	80874.9	74801
M283T1124	Octadecanoic acid;(9Z)-Octadecenoic acid;NA	283.259	1123.65	8022.68	11293.3	11107.1	8763.27	17869.6	12354.7	10020.8	8891.9	13023.2	8700.23	11315.8	11448.6	11465.3	6159.88	12203.9	7849.24	11048.1	23080	19205.1	11642.9	12388.9	27790.5	9459.22	12101
M218T114	Pantothenate	218.104	113.691	19798.5	20578.2	23198.9	23150.7	88579.4	97487.6	38048.8	82897.8	31161.3	34990	5977.46	23203	14748.7	67240	11867.4	11436.6	18615.1	8232.19	9886.82	11531.3	6691.73	34387.8	11558.7	18100.8
M218T143	Pantothenate	218.104	142.737	211635	563795	513956	128209	110021	296238	171421	539498	590340	277355	203800	135436	595789	466666	132791	1.00415e+06	164699	169609	100919	107535	122113	365138	138782	414266
M333T581	Penicillin G	333.09	581.419	22921.3	64866.7	81409.1	64878.3	73979.9	116661	65304	66651.5	33134.5	35027.4	50298.9	46517.7	64271	47037.2	31825.9	81128.3	56410	76656.2	43776.3	45961.9	49258.3	57662.1	33786.9	35288.1
M285T995	Pentadecanal	285.243	995.014	63280.8	35914.5	19219	21814.9	33584.5	22621.9	33452.2	56551.4	43137.9	26024.7	11928.9	30667.7	8020.6	31989.8	18171.6	14520.7	20667.9	19681.3	28292.1	16947.6	20825.3	12924.7	11557.9	16323.4
M121T310	Pentane-2,4-dione;2,4,6-Trihydroxytoluene;4-Hydroxybenzaldehyde	121.03	310.353	23100.3	16299.4	21297.8	39585.6	38993.9	42817.7	36254	41532.8	36945.2	39449.3	31336.1	40220.1	54194.3	50726.7	52200.2	34711.7	42495	29683.7	41880.2	37462	51786.2	51891.4	50501.2	109558
M93T257	Phenol	93.0346	257.295	916.204	992.372	1671.1	2748.69	1274.66	1769.81	1431.12	1019.71	801.65	2770.27	3790.78	1959.24	3042.07	1488.26	7296.36	858.358	2243.81	1498.66	3158.23	5324.5	5592.68	2217.46	5502.15	8404.87
M179T447	Phenylacetaldehyde;4-Hydroxystyrene	179.071	446.952	2351.71	8899.7	10321.3	3632.48	3884.6	7830.81	3223.08	5628.78	5562.1	5141.12	7121.71	4712.37	9103.15	5874.44	3210.14	12596	6134.12	5240.45	3329.55	3076.24	5562.28	17579.5	3577.41	4789
M135T421	Phenylacetic acid	135.045	420.719	5249.11	6460.23	10526.6	3281.57	2454.93	4713.18	2426.03	9865.63	16104.4	6221.79	6533.71	3937.99	23548.8	9595.08	5967.48	7305.51	4446.3	5949.31	3163.94	3708.39	4710.46	31220.3	6958.78	3789.21
M192T318	Phenylacetylglycine	192.067	318.192	7084.94	2423.85	4103.79	2295.1	1407.87	63177.2	10408.6	1234.05	792.006	1202.92	1172.41	70276	1486.69	1019.89	233800	1259.57	27325.8	1083.15	4179.07	2185.58	7631.41	6005.61	81391.2	1.78719e+06
M121T375	Phenylethyl alcohol	121.066	374.827	1096.67	5969.08	21462.7	46082.5	36930.5	36716.2	36229.1	11864.3	15315.1	36459	44447.2	34537.2	29586.3	23618.5	49803	9445.01	37248.5	32608.3	51643.4	44172	68224.6	31038.3	41018.4	40375.3
M122T375	Phenylethyl alcohol;4-Ethylphenol	122.069	374.75	0	447.563	2282.84	3194.69	3451.21	3224.54	3326.32	862.385	1406.53	2734.47	2249.68	2865.72	3695.39	2366.97	2682.23	760.229	2973.7	2614.21	3496.22	2916.4	6261.87	2554.66	3925.34	3571.17
M147T357	Phenyllactate	147.045	356.993	1903.99	2283.81	3777.09	6657.54	2746.12	3431.43	6134.96	1892.17	3582.4	8152.91	5760.36	9008.06	12245.5	3284.53	12625.4	2538.24	5071.41	2434.15	13719.9	9907.93	16773.5	12532.6	7746.99	46063.8
M149T503	Phenylpropanoate	149.061	502.75	36815.8	58907.2	102935	12649.9	20137.8	36091.7	18035.1	54115.7	60743.6	14331.2	15240.1	19131.1	192550	75246.6	17615.8	136312	23220.2	68273.3	14552.3	12315.8	27049.5	109951	18494.6	12174
M328T482	Phenylpyruvate	328.095	482.399	5484.91	12870.6	6132.57	14482.2	13103.8	7302.22	3804.41	17727	5917.75	6487.63	16481	4777.9	12380.3	3302.43	12649.5	12332.9	5789.97	4007.82	3849.13	13188.2	16573.4	4863.43	12008	13040.1
M327T482	Phenylpyruvate	327.091	482.462	28064.3	26147.4	33556.7	30006.8	21407.6	35763.2	23810.2	57691	30673.9	34898.5	20620.8	24625	22416.2	18924.2	14931.7	21673.4	27258	21097.3	17477.6	20259.7	12988.3	27147.3	15913.3	15620.2
M159T297	Pimelate	159.066	296.536	29177.9	44870	43980.3	42343.8	48705.2	41154.9	49861.5	63304.8	46462.8	43383.5	34602.9	53405.2	48349	66714.7	45115.6	53710.4	31821.4	48489.5	45833.9	45038.4	48389.8	46023.6	40986.2	72228.1
M315T1039	Pregnenolone	315.233	1039.19	3538.7	17689.8	18607.1	23007.1	20567.5	23643.7	22971	16609.5	22154	18756.9	22474.8	28961	17005.5	28988.2	28005	13479.1	22845.2	23358.4	24121.3	22095.2	28662.3	16374.8	17293.9	24045.8
M313T507	Progesterone	313.212	507.394	29077.1	13583.8	12919.3	8200.25	5360.95	12450.3	10360	17391.2	11099.1	7376.98	10289.3	12716	4623.54	23650.8	7865.55	12516.7	10775.4	14781.7	12819.5	17006.1	10041.8	8017.01	8545.82	2712.49
M166T114	Quinolinate	166.015	113.96	3884.94	5351.95	15733.4	8539.66	3434.24	5738.73	1669.11	4510.76	10922	12816.8	14359.1	11969.3	16708.4	9681.51	22776	6566.55	8108.46	4368.96	3750.47	3064.71	542.723	5928.7	6582.77	7624.54
M378T589	Reduced riboflavin	378.153	589.438	33687.3	34500.3	32788.1	34873.8	33987.4	33151.2	30587.6	33192.4	34944.5	34015.3	37504.5	31866	36093.6	35831.5	27419.6	33484	34039.9	36095.7	35297.8	31698.7	27535.9	36718.6	31919.4	25635.2
M443T84	S-Adenosyl-L-homocysteine	443.14	83.9225	42057	50380.9	60493.4	7544.82	35440.1	27954.9	34020.4	61334	80174.5	36205.1	16886.2	40151.8	45909.2	44324.9	39271.9	52922	32066.9	41175.1	34865.3	40753.6	18781.8	37093.9	37184.1	30861.8
M137T422	Salicylate	137.025	421.504	2560.53	3707.91	6070.02	2857.85	2843.24	4465.14	3070.56	2666.45	3656.76	2993.24	6175.3	2621.35	12131.1	4139.19	4897.37	4415.63	3863.11	2819.48	3644.4	3305.59	2830.23	5710.5	3814.68	4695.78
M347T428	Sinapine	347.114	427.936	29268.2	20771.7	19922.7	14689.2	17305	24503.1	18288.8	26979	27283.9	18203.5	20799.9	24754.7	15534.3	20307.8	17682.1	20687.6	22541.9	17217.3	16989.5	18507.3	21905.8	20689.3	27635.9	15452
M275T965	Stearidonic acid	275.202	965.154	5686.19	26061.1	40165.7	43535	31740.2	36935.3	43273.4	20703	35237.2	34461.1	34370.2	57080.9	27603	40311	46797.8	16575.2	36835.8	34480.1	51486.5	45193.1	58062	32202.8	40089.3	52172.9
M275T814	Stearidonic acid	275.201	813.696	1815.05	4437.28	4545.56	4116.1	4671.38	6455.87	7031.16	1573.41	2242.1	3680.87	6532	6303.66	3126.92	3824.75	5409.14	1356.09	7642.28	6843.61	7412.42	8685.75	11871.7	2920.84	6770.4	14975.9
M99T85	Succinate	99.0088	84.556	3582.82	3688.29	2785.52	12775.1	1135.9	3840.68	2460.66	5897.46	5931.48	10591.4	12212.4	14726	5814.56	7730.68	19793.3	5713.31	3014.28	4434.33	21457	20541.6	34983.5	6893.41	15037	46780.5
M117T84	Succinate	117.019	84.4415	35691.8	71966	108065	394150	42314.4	74137.8	71515	87330.2	174915	261151	377555	402910	205980	271322	526059	185717	104726	143387	500224	519646	838102	240766	418925	805423
M498T617	Taurochenodeoxycholate;Taurodeoxycholate	498.288	617.456	31920	34587.2	38301.9	160084	52358.6	92694.6	23724.5	97959.8	72636.8	66347.9	114147	24301.8	48597.7	72999.7	117913	17741.7	105965	21350.5	102678	128076	67711.6	446850	54818.6	288219
M514T512	Taurocholate	514.283	512.087	59122.9	5119.12	99237.5	620084	207905	392945	89041.7	1.66517e+06	262079	353515	845413	92802.4	324260	223213	808389	13304.1	599565	48413	446662	443883	374487	904837	269606	584630
M498T560	Taurodeoxycholate;Taurochenodeoxycholate	498.288	559.824	36969.9	14996.3	22888.6	103433	135423	161486	22002.7	1.12971e+06	95990	77733.5	194887	25567.8	160290	98878.2	506031	9300.45	195885	12275.6	169554	157961	68501.1	178664	78595.3	140164
M218T116	Tauropine	218.013	116.219	12438.8	13485.2	15909	16122.7	14061.2	16014.9	16347.1	16151.2	15242.1	14489.8	25175.2	17589.3	12243	19319.1	15103.4	11494.6	10667.3	17255.9	17677.6	12248.2	33548	19017.4	14530.9	14246.7
M367T1446	Tetracosanoic acid	367.357	1445.67	4628.96	5076.81	4508.06	3999.34	5057.98	5901.21	5307.27	6505.58	6884.15	4681.74	4173.13	4214.16	5398.48	5852.75	4637.6	3998.13	4177.3	4341.83	5390.55	3962.46	3943.97	4866.97	5210.31	4637.22
M227T1010	Tetradecanoic acid	227.202	1009.76	17841.6	32617.8	24197.7	18946.8	18605.9	26363.2	23123.1	25889.4	19546.4	14291.5	17073.9	21240.4	16976.8	31992.7	17720.2	23532	17833.5	23089.6	17681.3	16429.9	19396.4	15109.8	14501.3	17858.4
M349T698	Tetrahydrocorticosterone	349.238	698.125	11728.5	8445.96	10042.9	8878.71	12545.4	14537.8	4304.91	10441.8	9266	12647.8	16759.2	13897.6	5254.66	12769.3	16541.9	9725.42	13648	14287.1	10874	20066.3	13306.2	12637.9	24179.3	10461.7
M292T440	Thebaine	292.13	440.196	3698.18	5357.55	3907.61	5760.77	2703.99	4558.09	4115.73	4661.37	4943.25	4023.24	1933.02	5043.2	3857.43	5939.07	9536.78	4034.96	4761.32	6640.4	5502.64	5122.54	4253.43	5659.56	5673.67	3932.23
M135T47	Threonate	135.03	47.347	3944.97	3201.59	2460.85	4816.82	3708.15	3526.64	3937.65	2096.3	3332.24	2197.89	4335.83	3825.35	11449.9	5984.52	9687.52	15456.5	4959.54	4979.88	4703.52	3866.18	13974.3	8979.92	7282.54	60993.4
M151T301	Toluene	151.076	301.059	1099.51	1850.96	1391.17	1914.18	2025.2	1803.67	1740.28	1707.32	1456.74	1259.16	1332.72	1841.78	1350.43	2044.27	1737.55	1010.25	1485.2	2086.77	1795.77	1732.8	2100.05	1816.31	2081.47	1619.74
M307T296	trans-beta-D-Glucosyl-2-hydroxycinnamate	307.087	295.913	24633.9	32804.6	50146.6	52299.7	43465.8	29820.9	39943.1	30842.2	46039.7	33539.4	38522.9	28832.9	25887.8	44005	30012.2	8181.32	13967.8	52136.2	34903.7	41831.1	21594.8	27027.4	37917.6	21374.9
M251T362	trans-o-Hydroxybenzylidenepyruvate	251.06	361.706	5968.53	5547.62	7148.55	10649.4	8603.84	6765.27	8728.38	9220.34	10283.4	6839.15	7677.38	7897.13	7869.65	12708.4	10491.1	7667.45	7586.71	10757	10756.9	8101.2	11013.1	4788.45	9718.69	9199.39
M424T500	Traumatin;12-Oxo-9(Z)-dodecenoic acid	424.278	500.324	68903.9	51699.1	56124.2	7873.45	3522.91	25756.1	22685.9	69766.1	64315.5	59942.4	38630.3	23703.4	15581	21608.2	17467	13144.7	35408.1	29056.8	13801.6	21721.2	9981.53	25350.1	40274.9	11330.3
M167T77	Urate	167.021	76.6355	99764.1	98517.3	61592.5	73384.3	138562	162910	147164	200849	243589	168547	10952.6	106156	101350	116553	69747.4	70886.8	197390	157038	71552.4	61369.2	8544.93	91327.7	100718	218872
M151T85	Xanthine	151.026	85.2485	77044.1	116057	64485.4	23850.1	41413	69961.6	44091.2	60893.1	90223.5	40423.2	1987.62	35950.4	287785	80353.2	18112.8	440965	59281.8	66585.3	21281.9	20307.4	1516.42	143624	41425	27087.5
M283T109	Xanthosine	283.069	109.283	8993.51	18088.2	21595.3	9380.65	8014.48	14245.9	11129.3	10941.8	6031.28	9186.89	4861.81	8618.88	102956	26650.4	20049.7	161481	12493.5	21605.8	9329.22	8014.01	6056.39	34499.9	10026.5	23115.7
M204T384	Xanthurenic acid	204.03	383.746	6652.21	12331.8	15833.4	18064.2	18440.3	15423.4	15622.7	15525.3	14566	16114.9	17560.8	18984.2	16590.9	21838.8	17768.8	12297.7	14619.2	22824.4	25589.7	18364.1	27001	17482.1	20552.4	29817.2
M325T50	Xylitol;L-Arabitol;D-Arabitol;Ribitol	325.114	49.872	69738.9	79566.5	72098.7	59992.6	63150.9	47997.5	48374.2	49639.2	59770.6	51284.6	60474.2	74096.3	57720.9	53630.6	51950.9	73236.2	38147.4	52928.9	56712.7	65563.3	69389.5	57015	76388.6	27854.6
M133T66	Xylitol;Ribitol;D-Arabitol;L-Arabitol	133.051	65.688	30278.6	41234.7	40517.9	63230.8	39689.4	41576.6	38723.4	41246.6	44437.5	44469.3	41341.6	51672.9	41981.1	50544.4	35367.1	39935.3	31890.3	34023	40695.3	41605.4	53513.5	49298.5	32755.6	38846.9

## Sheet: positive ion mode
name	conound	mz	rt	Vehicle1	Vehicle2	Vehicle3	Vehicle4	Vehicle5	Vehicle6	Vehicle7	Vehicle8	CCl4 1	CCl4 2	CCl4 3	CCl4 4	CCl4 5	CCl4 6	CCl4 7	CCl4 8	SH1	SH2	SH3	SH4	SH5	SH6	SH7	SH8
M147T43	(2R,3R)-3-Methylornithine	154.602	305.506	110.618	759.145	1073.85	1060.65	852.261	699.243	1365.95	1261.81	813.539	523.877	715.232	822.521	984.513	1123.75	696.02	1105.83	738.486	1235.96	983.612	962.865	1300.73	1361.36	1252.72	1027.06
M179T529	(3S)-2-Oxo-3-phenylbutanoate	179.07	528.953	4053.49	3769.3	3907.07	3053.11	5835.24	3499.98	12212.3	4533.27	2342.18	4173.67	5860.72	5817.49	2870.21	2445.23	5943.47	2041.9	9882.67	2162.56	5273.61	6393.13	3662.54	1843.55	7031.71	2242.4
M285T1006	(5Z,8Z,11Z,14Z,17Z)-Icosapentaenoic acid	285.221	1006.4	3324.72	2262.29	3512.14	4621.94	4394.09	3971.5	3597.63	3500.74	3162.9	3453.76	4396.92	4227.77	3399.08	3820.9	4767.67	4509.81	4253.7	4879.42	4601.97	3735.5	4587.74	3582.34	7050.98	4501.1
M261T928	(6Z,9Z,12Z)-Octadecatrienoic acid;Crepenynate	261.222	733.64	15626.8	39422.6	63148.6	38662.9	45271	49208.6	73397	36155.1	16423.8	32347.4	59598.4	42478	43101.3	38076.3	86469.3	36946.9	47304.5	39386.4	60531.1	50872.2	58789.9	51322.7	75880.3	66923.3
M295T598	(7S,8S)-DiHODE;5S,8R-DiHODE;9(S)-HPODE;Colneleate;(8E,10R,12Z)-10-Hydroperoxy-8,12-octadecadienoate;(8E,10S,12Z)-10-Hydroperoxyoctadeca-8,12-dienoate;(9Z,12Z)-(11S)-11-Hydroperoxyoctadeca-9,12-dienoic acid;8(R)-HPODE;(9Z,11E)-(13S)-13-Hydroperoxyoctadeca-9,11-dienoic acid;Octadec-9-ene-1,18-dioic-acid	313.237	597.876	9929.64	17682	19643.5	20548.7	20607.8	23355.1	30776.3	12881.7	11256.6	16257.3	27589.4	29110.3	17026.7	18088	33902	18737.4	36398.2	35065.6	30296	37500	59508.7	17354.7	31249.9	56484.1
M313T598	(8E,10R,12Z)-10-Hydroperoxy-8,12-octadecadienoate;(8E,10S,12Z)-10-Hydroperoxyoctadeca-8,12-dienoate;(9Z,12Z)-(11S)-11-Hydroperoxyoctadeca-9,12-dienoic acid;8(R)-HPODE;(7S,8S)-DiHODE;5S,8R-DiHODE;9(S)-HPODE;(9Z,11E)-(13S)-13-Hydroperoxyoctadeca-9,11-dienoic acid	85.9411	1479.07	5087.21	5012.62	6632.3	6531.48	7531.9	7342.62	5988.25	5659.32	5138.42	6748.27	6484.46	6522.59	7616.27	6239.51	6947.81	6943.61	5925.9	4756.77	7046.97	7540.34	7606.69	5495.85	6859.15	6934.05
M315T624	(8E,10S)-10-Hydroperoxyoctadeca-8-enoate	85.9625	40.9465	496.403	909.238	1235.47	950.084	627.273	551.68	778.62	1226.7	749.547	319.27	468.101	909.296	1416.31	1260.39	576.241	717.759	600.896	954.263	1108.45	837.02	498.12	1537.77	1378.35	1144.46
M297T757	(8E,10S)-10-Hydroperoxyoctadeca-8-enoate;9(10)-EpOME;12(13)-EpOME;18-Oxooleate;9,10-DHOME;12,13-DHOME;9,10-Epoxy-18-hydroxystearate	315.253	623.861	7096.24	19465.5	20432.3	10063.6	14344.4	25265.6	13398.7	15941.4	13493.2	6345.82	10477.3	10855.5	46023.4	31238	8490.51	63224.2	13691.5	23686.5	10738.9	7586.96	14959.1	32425	12306.4	9125.84
M265T1124	(9Z)-Octadecenoic acid	265.253	1123.61	5133.13	6812.74	11034	10729.2	9464.72	9340.66	8228.89	9314.45	8865.28	8114.31	9365.2	9954.93	9054.26	12382.1	11937.3	12511.5	10510.3	9407.47	10723.3	9594.37	12229.9	10162.3	10630.5	11723.7
M266T942	(9Z)-Octadecenoic acid	267.268	1191.59	2344.68	2007.38	3080.01	2208.29	2169.77	2891.03	2743.63	3244.52	2016.19	2019.43	2618.37	2781.41	2792.77	3299.66	2479.98	2269.44	2468.45	2832.74	3845.4	2328.35	4822.79	2496.89	2107.02	1941.39
M300T986	(9Z)-Octadecenoic acid	301.115	647.249	2306.32	1127.84	1873.31	4258.68	1736.19	4035.37	2437.59	4609.48	1715.56	4061.3	1762.27	3428.76	3723.57	1790.23	1249.3	4200.58	1910.68	4134.97	2071.37	1320.95	2026.54	1994.17	3508.47	2046.17
M314T598	(9Z,11E)-(13S)-13-Hydroperoxyoctadeca-9,11-dienoic acid;(9Z,12Z)-(11S)-11-Hydroperoxyoctadeca-9,12-dienoic acid;9(S)-HPODE;8(R)-HPODE;(8E,10R,12Z)-10-Hydroperoxy-8,12-octadecadienoate;(8E,10S,12Z)-10-Hydroperoxyoctadeca-8,12-dienoate;(7S,8S)-DiHODE;5S,8R-DiHODE;Octadec-9-ene-1,18-dioic-acid	314.24	597.876	2925.23	4603.1	5216.86	4015.42	5122.37	5501.74	6677.41	4193.18	3429.48	3723.28	6900.22	7224.62	4849.43	4855.71	8048.05	3741.52	7879.17	7614.19	7004.98	7883.08	13885	4629.38	7101.79	13091.6
M295T764	(9Z,12Z)-(11S)-11-Hydroperoxyoctadeca-9,12-dienoic acid;8(R)-HPODE;(7S,8S)-DiHODE;5S,8R-DiHODE;(8E,10R,12Z)-10-Hydroperoxy-8,12-octadecadienoate;(8E,10S,12Z)-10-Hydroperoxyoctadeca-8,12-dienoate;Colneleate;9(S)-HPODE;(9Z,11E)-(13S)-13-Hydroperoxyoctadeca-9,11-dienoic acid;Octadec-9-ene-1,18-dioic-acid	86.0596	87.21	999.998	1685.59	2059.27	2026.7	2025.49	1809.38	2684.58	2372.22	19586.2	21919.1	1901.35	1727.82	2956.61	2671.65	2393.43	47063.9	1579.83	3089.41	1893.66	18461.7	2393.25	46955	2942.2	4884.49
M134T355	(E)-4-Hydroxyphenylacetaldehyde oxime	144.08	245.179	3867.2	4053.06	4400.81	4489.59	2838.14	3011.2	3360.58	3307.48	8898.21	10059.9	6174.28	6022.11	2451.81	2042.78	2795.59	2299.97	3185.65	1834.19	3806.84	5407.16	20004.2	20625	53171.8	40494.4
M301T942	(R)-10-Hydroxystearate	295.227	764.4	12567.8	17313.7	18715.7	22520.1	25602.2	26756.8	35844.8	18717.2	12247.1	21528.2	30837.6	39058.2	21273.9	95400.3	43210.3	13252.9	37277.1	33483.8	42921.7	43214.8	80959	19439.4	44705.7	62924.6
M300T869	(S)-N-Methylcoclaurine	300.261	971.404	16993.2	14840.7	10836.3	8005.32	14263.4	8505.84	18853.4	43575.7	22249.9	42934.5	19592.2	12236.4	13927.5	10047.8	3923.85	38708.7	15616.8	13145.8	4269.21	6646.04	7209.51	27927	15789.8	8583.4
M254T622_1	(S)-Norcoclaurine	301.274	942.101	26554.1	9306.23	7448	5827.93	10287.6	8837.87	14910.5	25691	16720.9	21493.6	20113	14625.4	10507.9	7070.49	4189.91	25154.2	16352.9	16024.9	6633.98	8463.32	3889.5	28612.4	18787	10409.6
M317T444	1-(3,4-Dimethoxyphenyl)-2-(2-methoxyphenoxy)propane-1,3-diol	317.209	894.828	6421.86	10847.8	17657.5	13611	29080.6	18217	23552.7	7899.84	9979.31	15561	16710.1	22138.5	11638.8	12091.1	23747	23562.2	22336.6	19842.9	23641.6	28532.3	39765.3	39001.8	41978.8	38817.2
M297T611	12(13)-EpOME;9(10)-EpOME	86.0596	45.864	628.335	2086.88	897.687	2065.25	2143.89	924.509	1224.36	881.94	1027.93	1822.37	1000.04	2515.74	4866.8	890.099	1362.88	1667.46	962.187	2186.1	780.694	2393.54	1540.51	1607.72	1644.82	4081.49
M319T859	12(13)-EpOME;9(10)-EpOME;18-Oxooleate	319.303	942.028	4728.2	3174.15	2743.87	2082.6	3534.82	3664.06	4462.69	6868.85	5414.58	6976.87	6394	4985.2	3697.76	1942.04	2423.78	7655.33	5064.77	4929.33	2472.46	3435.28	2628.65	8519.17	6190.83	3164.29
M607T1038	15,16-Dihydrobiliverdin;(3Z)-Phytochromobilin	86.096	83.987	13639.5	26367.8	31100.9	26626.2	20626.1	36402.9	29934.9	31368	28634.4	22213.6	29712	23513.1	125358	47750.1	30731.5	61429.1	35995.2	25376.8	27981.1	18719.5	1359.45	71408.9	33669.4	41250.6
M281T1021	18-Hydroxyoleate;9-cis,11-trans-Octadecadienoate;Linoleate;cis-9,10-Epoxystearic acid	86.0959	48.7705	2604.46	2413.64	4033.44	2029.84	2379.01	2716.12	3671.79	1879.53	1653.48	2544.01	2220.44	2511.42	4550.35	3868.87	5192.71	3832.07	2840.66	2105.89	1901.31	2163.7	4313.68	3268.22	3348.01	4099.19
M281T709	18-Hydroxyoleate;Linoleate;9-cis,11-trans-Octadecadienoate;cis-9,10-Epoxystearic acid	297.243	610.54	4885.7	7905.21	9969.66	7408.26	8997.66	11778.4	10437	9860.62	8964.79	5554.42	5926.88	7756.15	22376.6	14991.5	7525.8	20855.4	7751.83	14275.7	7577.49	5636.17	11854.9	16036.8	10356.7	8681.63
M314T929	18-Oxooleate	607.254	1037.65	637.394	964.414	695.691	865.832	1356	1036.22	1851.44	554.83	697.735	964.77	1774.79	1772.53	946.17	385.237	2640.11	695.863	761.697	675.963	1900.79	2094.48	1298.06	563.388	1462.12	2346.31
M297T928	18-Oxooleate;(8E,10S)-10-Hydroperoxyoctadeca-8-enoate	281.248	1020.53	13296.8	8426.04	8266.04	7963.57	17407.2	9021.66	28240.5	12965.9	7477.42	20474.8	20725	15111.3	19336.7	7465.16	18466.2	18403.4	10319.6	12521.8	17154.9	20809.9	15832.5	11800.7	19712.3	32532.4
M319T928	18-Oxooleate;9(10)-EpOME;12(13)-EpOME	319.304	672.488	188637	179235	160893	166486	155017	159058	156689	174948	146909	147713	157301	145075	173312	152659	157645	157580	192807	146218	155762	164030	169534	163693	168029	178309
M297T833	18-Oxooleate;9(10)-EpOME;12(13)-EpOME	279.232	928.13	31315.3	75087.6	85655.1	89786.2	92099.6	132748	142976	50980.6	77987.3	92530.1	97815.8	119385	83198.5	84318.1	95932.4	56247.8	166506	146687	143832	162881	220725	78344	117559	251276
M279T860	18-Oxooleate;Crepenynate;(6Z,9Z,12Z)-Octadecatrienoic acid;9(10)-EpOME;12(13)-EpOME	165.055	244.257	953.205	925.952	1305.37	4325.07	2680.04	1653.53	2485.18	1333.72	836.867	4031.13	5717.8	4177.57	3166.79	1131.43	11915	1135.95	2124.12	1956.21	5581.14	6450.04	6843.85	1817.03	10313	4713.84
M279T928	18-Oxooleate;Crepenynate;9(10)-EpOME;12(13)-EpOME;(6Z,9Z,12Z)-Octadecatrienoic acid	86.9923	40.9365	10646.5	13128.7	25700.6	24545.7	17026.1	20907.4	24837.9	31938	19980.1	16013	8144.24	19773.9	29617.7	29961.2	35924.7	25080.9	17587.5	17862.4	28406.8	25616.2	15033	32073.8	38901.9	35403.8
M209T85	2,3-Diaminopropanoate	373.273	726.611	153815	28472.2	23080	32925.7	141411	143040	136519	807609	890007	215256	395150	130299	898990	148336	104413	300956	208136	135878	77640.1	252965	126591	336373	219565	58209.4
M192T214	2-Fluorocyclohexadiene-cis,cis-1,2-diol-1-carboxylate	195.084	49.748	4857.32	3537.7	4698.31	5675.18	6687.94	7121.64	9306.81	8162.86	2931.61	2451.55	6641.87	8853.33	9435.76	8430.27	13161	7373.26	6310.57	5831.95	7042.36	7453.83	8544.34	6712.82	7408.62	6873.68
M165T244	3-(4-Hydroxyphenyl)lactate	87.0038	1479.97	1187.1	510.454	1358.66	1121.94	1238.66	1543.16	1099.5	542.226	1370	1298.2	1470.08	1358.17	1527.13	1496.24	1040.61	1315.49	1117.61	1015.25	1123.84	1361.61	870.486	992.166	1418.27	1527.71
M198T67	3,4-Dihydroxy-L-phenylalanine	431.276	643.449	21431.7	21498	22881.4	42283.7	14903.2	21314.1	11347.6	35422.8	28442.1	32477.8	24477	12519.4	20492.3	17222.2	17535.3	7379.72	43638.7	22044.9	8944.36	9183.3	15059.5	35021	14776.6	21089.2
M373T727	3alpha,12alpha-Dihydroxy-5beta-chol-6-enoate	389.268	674.833	136177	236898	227173	435453	124020	132435	107647	623001	238141	366351	281849	178551	280262	143855	84471.7	38966.1	348284	246180	35178.7	28742.8	91091.9	531753	212574	119939
M431T643	3alpha,7alpha,12beta-Trihydroxy-5beta-cholanate;Cholic acid	87.0993	83.887	846.112	1865.64	2387.87	1676.78	1233.56	2617.41	1912.12	2213.04	1742.48	1633.42	1968.93	1521.56	9382.07	3168.95	2050.32	4419.72	2267.16	1731.79	1854.78	1358.01	1634.85	5362.72	2456.21	2970.26
M840T643	3alpha,7alpha,12beta-Trihydroxy-5beta-cholanate;Cholic acid	153.054	272.164	4320.62	3485.1	1570.13	2382.63	3853.95	1538.91	3502.38	3577.05	1527.86	2141.76	2543.69	1912.22	2112.36	2015.99	4181.22	3472.12	2952.17	1814.43	3346.18	1286.17	3310.49	5651.21	2743.93	3669.99
M389T643	3alpha,7alpha-Dihydroxy-12-oxo-5beta-cholanate;7-Oxodeoxycholate	389.268	928.098	5323.89	4163.66	6591.6	8050.54	13589.8	16947.1	9433.6	14805	4661.01	7355.34	7821.68	5666.08	11920.1	7662.98	6604.09	9646	7232.97	8417.22	7159.12	7141.72	5776.76	9049.63	5493.3	4541.73
M389T675	3alpha,7alpha-Dihydroxy-12-oxo-5beta-cholanate;7-Oxodeoxycholate	87.9238	1479.07	19199.4	18927.6	19279.6	21897.8	19998.8	20814.5	21962.2	19968.1	19323.6	19946.9	17943.7	19790.4	19604.5	21464.3	19820.1	18887.3	20487.9	20939.8	19816.9	20035.5	22112.2	20111.4	19163	20387.3
M389T500	3alpha,7alpha-Dihydroxy-12-oxo-5beta-cholanate;7-Oxodeoxycholate	357.279	705.031	2.27995e+06	381764	562697	383269	1.02277e+06	1.74162e+06	551330	2.232e+06	2.78229e+06	1.74334e+06	1.34511e+06	1.31351e+06	2.01687e+06	2.78209e+06	1.74751e+06	2.38857e+06	2.24037e+06	1.33686e+06	1.14888e+06	1.2812e+06	867437	1.45176e+06	524301	582945
M136T101	3-Hydroxy-2-methylpyridine-5-carboxylate	145.097	44.735	1293.71	1605.12	1892.14	1573.74	1883.09	2609.54	1089.75	1660.23	4219.68	2045.7	1264.64	1803.88	5181.79	2033.56	3887.23	1866.56	1334.8	3084.82	2342.36	4179.75	5486.92	1391.9	2073.03	3236.42
M146T339	3-Methyldioxyindole	206.045	281.323	2980.26	7234.22	6985.82	6218.43	8161.47	7492.19	8974.17	6180.96	6972.46	7153.85	7571.34	8086.1	7283.32	6227.1	6529.51	7281.88	6748.35	9034.82	7625.19	8383.41	8765.31	7703.93	8743.04	6973.78
M357T705	3-Oxo-5beta-cholanate	190.05	154.464	1617.97	4217.01	5871.65	11195.5	10525	7303.01	4828.64	6839.49	5684.26	2782.04	2459.78	4987.13	6780.55	16801	7533.17	654.261	3824.73	9527.56	7711.81	3536.33	24988.7	4460.42	13153	7777.57
M206T306	4-(2-Amino-3-hydroxyphenyl)-2,4-dioxobutanoate	209.067	99.58	1624.64	2261.98	2323.53	2463.27	2561.38	1988.63	2423.67	2719.45	1974.92	1891.44	1719.45	2576.16	1841.6	2780.29	2702.46	1740.63	1832.03	2192.74	2070.85	1572.2	4852	1758.4	2575.17	1907.89
M154T49_2	4-(beta-Acetylaminoethyl)imidazole	147.044	374.415	829.004	604.194	1208.6	787.988	1248.01	1392.84	1607.02	1563.23	652.583	1166.34	1332.57	1363.47	599.079	850.371	3657.42	634.897	4631.54	819.161	1326.19	990.51	1490.7	954.473	3016.47	11790
M190T154	4-Acetamidobutanoate	87.9932	40.921	1597.57	3457.75	3405.82	3693.25	3120.34	3397.2	3466.07	5069.13	2983.84	2271.95	1147.51	3259.85	4523.84	5253.01	5362.5	4193.7	2613.23	2713.62	4216.92	4010.73	2071.99	6366.96	5074.82	5966.43
M208T154	4-Amino-4-deoxychorismate	210.113	268.048	5962.89	7896.93	8680.55	6851.46	9543.88	9456.97	10405.9	14117.6	9418.09	8119.94	6493.96	9322.05	8933.89	12727.4	10283.5	10452.9	6238.85	10140.6	7603.7	7305.9	7684.86	13202.9	13474.7	9688.7
M147T374	4-Coumarate	153.054	358.506	1122.94	1423.3	1812.75	2492.23	2148.17	2373.16	1912.8	2510.29	1532.66	1789.94	1610.09	1868.88	1789.24	2548.05	3526.98	2831.75	2302.81	1699.2	1809.4	1705.75	2715.87	2151.45	3014.3	4102.61
M153T359	4-Hydroxy-3-methoxy-benzaldehyde	290.139	462.704	2968.71	4190.75	2964.62	1845.27	3611.39	2587.51	1669.52	3529.93	4452.61	2003.55	1408.87	1723.25	1531.12	3820.53	1776.92	2618.53	2634.93	2328.88	2613.02	3857.02	1066.76	2059.33	2781.26	1476.42
M290T463	4-Hydroxyphenylacetaldehyde;Phenylacetic acid	135.117	370.223	7615.35	9448.74	9169.78	9404.86	9950.89	8390.96	11206.4	9815.79	8879.21	8026.88	6877.99	10291.8	9925.19	12720.2	10789.6	11351.7	7091.57	10925.4	10166.1	9015.75	10472.5	10045.1	9030.07	9899.98
M153T272	4-Hydroxyphenylacetate;3-Hydroxyphenylacetate;2-Hydroxyphenylacetate	147.044	528.855	4087.74	2692.68	3462.91	1941.67	4834.61	3057.81	9918.73	3900	1984.88	2772.66	5023.36	4909.66	2062.96	1748.62	4452.16	1291.01	8465.75	1710.84	3638.45	4334.22	2837.27	1641.5	6532.72	1722.25
M299T580	4-Hydroxyphenylethanol	166.05	95.835	1813.34	2536.03	2922.83	2806.69	3123.78	2882.5	3451.35	5481.44	2496.98	2605.16	2226.2	3238.81	2772.7	4089.3	2675.77	3107.64	2570.58	2753.8	2811.51	2509.88	3460.65	3188.43	4004.62	4531.81
M327T438	4-Methoxybenzoate	327.205	483.695	9823.9	11540.8	11710.8	12521.1	11997.1	10619.9	11783.1	15230.3	12027.7	9716.57	14894.5	11697.8	10453.3	15163.6	10052	12018.5	11289.3	13179	12857.1	10201.3	14820.5	14065.9	12331	11068.2
M258T512	4-Methylaminobutyrate	259.165	187.122	6621.63	5383.49	6490.72	4104.34	3842.54	4799.31	5479.76	8026.64	6774.09	4182.73	3469.45	5192.66	4447.28	7901.96	4972.25	8937.9	4740.18	6723.23	6114.74	4093.65	5967.5	7475.2	9139.34	5377.82
M135T370	4-Methylaminobutyrate	88.0211	713.754	5006.57	4469.59	4102.02	4161.05	4272.01	3957.91	4593.95	4108.15	4218.58	4328.41	5620.75	4079.51	4274.12	4163.51	4186.97	4203.93	3915.46	4182.49	4247.45	4171.2	5204.34	4361.12	4352.35	4552.46
M257T512	4-Methylaminobutyrate	252.109	89.7285	18071	15443.8	29401.7	18495.8	13157.6	10827.3	27482	32832	16746.2	9864.91	3533.53	17123	22334.8	24777.7	29797.2	12520.1	9336.87	15846.4	16246.4	19903.8	24881.1	33937.5	13071.9	21939.2
M147T529	4-Methylcatechol	88.0388	45.5665	2080.83	2931.57	3811.82	1817.94	1513.53	1687.7	2083.09	4716.37	2365.66	2205.49	2015.24	1703.48	3292.25	1638.1	1083.1	3344.49	2457.32	1257.37	1278.15	1534.35	1350.99	2233.16	3243.4	1748.33
M272T84	4-O-Dimethylallyl-L-tyrosine	272.944	40.926	2850.46	5408.15	4689.29	5132.31	5615.1	5483.76	5874.92	6128.7	4050.97	4089.42	4399.33	4420.97	5323.82	5874.05	5449.2	6118.55	6244.25	5016.62	4976.98	5583.22	4035.39	6822.08	4592.08	9631.47
M166T96	4-Pyridoxate	298.096	224.79	2287.33	2295.23	5096.79	5718.64	3127.72	2093.8	1690.34	3863.45	3899.18	2132.39	2851.97	2488.27	2362.08	18550.4	3549.31	2569.98	3707.69	2961.12	4195.81	4065.46	2273.44	3326.7	5903.36	2457.74
M154T144	5-Aminolevulinate	159.113	49.366	3718.4	3271.35	16871	4264.86	5758.07	3380.95	4024.77	28043.4	2725.34	1879.8	4066.87	24847.4	5210.09	3872.92	19024.3	7836.12	2637.3	3642.41	5780.35	3603.46	7465.3	43599.3	3873.13	5726.8
M210T130	5-Dehydro-4-deoxy-D-glucarate;2-Dehydro-3-deoxy-D-glucarate	212.136	557.995	30056.9	37103.2	28072	26193.7	21102.2	22953	16296.7	16654.8	31240.7	37974	36969.3	29628.5	23960.3	20734.6	15993.4	14607.5	28941	30379.5	24291.6	36384	31311.2	17024.5	11239.5	13901.1
M252T90	5'-Deoxyadenosine;Deoxyadenosine	130.05	78.806	11177.3	17352.6	15047.5	14300.6	9079.56	8699.38	14518	27106.3	13420.8	11332.4	14330.1	9731.74	13677.2	6238.28	5062.64	16149.6	12520.6	9363.62	6896.42	8077.99	636.551	8424.23	10056	15770.5
M298T225	5'-Methylthioadenosine	330.264	779.791	32251.1	15240.2	48970.5	18887.1	23709.8	22361.4	105333	17266	37362.7	26299	71740.4	30392.2	23534.8	15942.6	108461	12145.6	42425	88873.4	37927.9	41039.7	67283.4	23325.6	44408.7	59687.2
M130T46	5-Oxoproline	164.035	107.425	312.467	503.945	807.413	1356.88	1240.63	934.58	722.035	1172.65	1074.97	719.156	289.341	837.549	1034.66	2922.76	1315.24	699.258	1191.98	3576.54	1986.54	958.9	4315.71	1545.82	2214.6	2022.04
M330T780	5S,8R-DiHODE;(7S,8S)-DiHODE;8(R)-HPODE;9(S)-HPODE;(9Z,12Z)-(11S)-11-Hydroperoxyoctadeca-9,12-dienoic acid;(9Z,11E)-(13S)-13-Hydroperoxyoctadeca-9,11-dienoic acid;(8E,10R,12Z)-10-Hydroperoxy-8,12-octadecadienoate;(8E,10S,12Z)-10-Hydroperoxyoctadeca-8,12-dienoate;Octadec-9-ene-1,18-dioic-acid	88.1118	1471.45	64126.8	78148.9	68190.8	75063.3	75975	70168.5	77510.6	72937.2	76175.9	87468.5	68387	67332.1	75683.7	71124.2	82260	76116.7	67351	89208.6	74079.2	77888.8	78576.1	73897.8	73515.6	78718.5
M188T115	6-Acetamido-2-oxohexanoate	389.268	761.912	191571	395151	325814	421972	374760	463800	543936	978829	360199	369049	311196	270225	562817	524914	231911	400587	355710	588749	187344	163386	298346	507309	415115	175724
M164T107_1	6-Oxo-1,4,5,6-tetrahydronicotinate	88.5088	1479.07	8797.85	8321.41	7816.77	8726.48	9459.13	8227.87	8572.02	7206	8137.82	9182.79	8948.56	8260.26	8259.08	8146.23	8481.48	8265.62	8318.54	8365.17	8713.65	8044.87	8115.35	8613.64	8552.71	7917.6
M389T762	7-Oxodeoxycholate;3alpha,7alpha-Dihydroxy-12-oxo-5beta-cholanate	330.264	763.717	10144.5	20770.6	16915.3	17020	22669.2	20828.3	29903.7	12051	10039.4	20782.2	25298.1	37220.8	14051.5	14927.9	35093.8	8224.17	37791.9	32562.8	36450.2	35662.7	71981.4	16569.6	38264.3	63996.1
M330T764	8(R)-HPODE;(7S,8S)-DiHODE;5S,8R-DiHODE;9(S)-HPODE;(9Z,12Z)-(11S)-11-Hydroperoxyoctadeca-9,12-dienoic acid;(8E,10R,12Z)-10-Hydroperoxy-8,12-octadecadienoate;(8E,10S,12Z)-10-Hydroperoxyoctadeca-8,12-dienoate;(9Z,11E)-(13S)-13-Hydroperoxyoctadeca-9,11-dienoic acid;Octadec-9-ene-1,18-dioic-acid	88.9316	1479.07	15100.9	15553.8	15822.4	15199.4	14078.8	13903.6	16138.6	15527.4	15839.9	13931	13735.9	14864.1	14856.4	15171.1	13411.7	15659.4	14996.1	14791.2	14372.2	15176.3	15437.2	16124.3	14302.7	15195.7
M593T1046	9(10)-EpOME;12(13)-EpOME	593.597	1318.07	7375.78	171977	142514	124665	143640	116567	133234	49536.5	115733	129324	123606	124882	124853	75011.8	112313	113623	53884	131076	152461	108749	120756	112910	111081	68240.5
M279T597	9(10)-EpOME;12(13)-EpOME;(6Z,9Z,12Z)-Octadecatrienoic acid;Crepenynate	280.235	872.51	40406.4	4665.3	5535.24	4818.37	5470.47	5702.52	6284.78	4965.39	39194.3	4036.96	5770.93	6737.99	5621.42	5295.84	6492.14	51410.3	9090.12	8514.19	7094.87	8326.15	13204.3	5443.68	56256.5	11095.1
M298T597	9(10)-EpOME;12(13)-EpOME;9,10-DHOME;12,13-DHOME;18-Oxooleate;(8E,10S)-10-Hydroperoxyoctadeca-8-enoate;9,10-Epoxy-18-hydroxystearate	298.245	597.112	2602.66	3709.29	5120.29	3399.24	2842.46	4260.13	5605.19	3689.1	3027	3528.63	4740.1	3674.13	5268.85	4415.97	4642.29	5762.82	3584.25	4557.3	4715.93	4385.19	5016.32	4689.15	6436.97	5106.79
M313T699	9(S)-HPODE;(9Z,11E)-(13S)-13-Hydroperoxyoctadeca-9,11-dienoic acid;8(R)-HPODE;(9Z,12Z)-(11S)-11-Hydroperoxyoctadeca-9,12-dienoic acid;(8E,10R,12Z)-10-Hydroperoxy-8,12-octadecadienoate;(8E,10S,12Z)-10-Hydroperoxyoctadeca-8,12-dienoate;(7S,8S)-DiHODE;5S,8R-DiHODE	295.227	847.102	5902.55	9849.95	11318.4	12808	11901.6	14369.1	14851.9	24129.7	11114.6	11807.4	13529.4	15320.4	11262.6	14416.8	13021.4	25688.7	15017.3	17406.7	13699.8	13082	23252	24337.9	16446.3	15445.7
M295T847	9(S)-HPODE;(9Z,11E)-(13S)-13-Hydroperoxyoctadeca-9,11-dienoic acid;Colneleate;5S,8R-DiHODE;(7S,8S)-DiHODE;8(R)-HPODE;(9Z,12Z)-(11S)-11-Hydroperoxyoctadeca-9,12-dienoic acid;(8E,10R,12Z)-10-Hydroperoxy-8,12-octadecadienoate;(8E,10S,12Z)-10-Hydroperoxyoctadeca-8,12-dienoate	88.9521	40.945	862.492	1187.63	1271.37	1307.6	1277.94	2033.79	1124.65	2440.07	1081.12	1487.13	1057.14	3756.7	1796.5	1659.85	1516.52	1193.03	1420.6	1014.23	1235.18	1390.16	1633.9	2180.24	2481.44	1511.5
M333T597	9,10,18-Trihydroxystearate	315.253	733.628	254325	597006	881499	518775	611834	624734	910732	584408	260519	490860	772471	575433	568451	499163	979119	510040	679367	527265	788415	648679	715433	681139	878449	810089
M315T734	9,10,18-Trihydroxystearate;9,10-DHOME;12,13-DHOME;9,10-Epoxy-18-hydroxystearate;(8E,10S)-10-Hydroperoxyoctadeca-8-enoate	88.9899	40.927	1913.62	2445.66	5286.14	4056.53	4042.05	3916.42	4493.57	6061.39	3611.5	2095.69	1500.71	3589.43	5905.79	5285.68	6135.4	4397.48	2540.46	2826.47	5345.19	4309.84	2546.57	6617.27	6962.11	6703.77
M315T597	9,10-DHOME;12,13-DHOME	316.126	490.698	8752.09	11342.2	15372.4	13487.7	13606.2	16461.7	14880.4	16521.2	10112.7	11139.6	11128.7	11317.5	12885.6	13634.1	9103.12	13284.5	11554	12475.9	13368.1	12227.1	13826.4	14557.3	13835.7	11005.3
M297T597	9,10-DHOME;12,13-DHOME;12(13)-EpOME;9(10)-EpOME	89.0082	1478.13	6606.17	7112.11	5890.37	5350.46	5212.62	5680.37	5311.17	6476.71	5738.94	4651	5297.67	5517.63	5153.64	6190.6	4666.71	5549	5558.09	6093.33	5701.02	5729.29	5122.76	4928.68	5700.63	5075.63
M297T623	9,10-DHOME;12,13-DHOME;9(10)-EpOME;12(13)-EpOME;(8E,10S)-10-Hydroperoxyoctadeca-8-enoate;9,10-Epoxy-18-hydroxystearate;18-Oxooleate	297.242	596.922	9000.14	17479.4	23841.3	14306.5	18422.7	18715.7	30479.7	17759.1	11396.2	14795	23018.2	24801.5	24067.4	17823.9	23238.7	26349.9	17074.1	23973.4	30403.3	21610.1	26175.7	23954.1	31204.4	28296.9
M317T709	9,10-Dihydroxystearate	317.269	708.681	10518.8	40676.1	26198.2	14726.8	22327.5	11451.8	40641.6	73082	22769.2	16013.1	21140.2	19309.7	41723.2	9474.13	22410.3	47920.8	16788.3	36663.8	9350.33	22724.6	20597.4	39680.8	33875.7	15974
M667T734	9,10-Epoxy-18-hydroxystearate	667.467	1388.74	5201.9	4000.91	3253.75	1769.3	1816.1	3060.67	4454.68	2464.79	5313.37	3754.25	2220.58	1659.29	2579.72	2520.55	4074.66	3970.68	2563.5	3558.32	2524.72	1751.14	2598.64	2937	2501.15	2056.22
M332T734	9,10-Epoxy-18-hydroxystearate;9,10-DHOME;12,13-DHOME;(8E,10S)-10-Hydroperoxyoctadeca-8-enoate	332.279	733.629	28588.2	65814.8	113425	60016.6	75919.2	74825.1	108090	56735.3	28269.4	53297.3	97439.5	60914	59385.9	51583.7	119843	54270.7	75915.8	60706.4	104689	76021.6	84420.9	80401.9	125482	89571.2
M647T734	9,10-Epoxy-18-hydroxystearate;9,10-DHOME;12,13-DHOME;(8E,10S)-10-Hydroperoxyoctadeca-8-enoate	646.524	912.025	946.817	1651.53	2056.46	1143.07	1838.25	2048.32	2400.27	986.455	928.479	870.086	1574.67	1517.17	962.135	1178.1	3343.48	1012.34	1717.55	1326.5	2491.54	1153.96	2273	1194.41	2859.73	2132.28
M263T709	9-cis,11-trans-Octadecadienoate;Linoleate	263.237	1020.53	10229.9	7517.92	6589.58	7157.38	11910.3	6718.87	21996.5	10431.9	5388.24	14115.4	14536.9	10779.4	14239.1	6814.44	13399.2	13222.3	7454.35	8834.6	12858.1	14085.1	11715.2	9455.57	13337	39103.1
M268T86	Adenosine	268.104	85.854	59938.6	78827.8	121736	148007	68168.2	96719	101125	133507	65064.8	48979	20162.3	96494.2	98435.1	188998	166017	78672.5	52684.2	106719	98575.9	103669	152587	79416	73781.5	72287.5
M144T103	Alanopine	144.044	281.322	3308.19	7303.21	7417.6	9771.75	8700.84	10095.1	10360.9	10720.5	7998.32	7730.6	6971.64	9009.62	10561	8760.29	9468.17	10423.3	8143.18	8727.55	8485.87	9591.37	10438.2	12557	12246.2	10753.6
M147T490	Aminoacetone	235.169	642.908	21338.6	18156.4	27826	50592.4	54287.9	55472.9	38533.4	33263	25243.6	30383.6	34504.8	43868	29044.4	45018.9	36047.6	18170	33012.9	59511.7	60267.1	45401.9	51362.2	34586.7	46006.6	56072.2
M239T333	Anisole	241.004	40.9505	2981.51	4001.74	4930.94	5578.09	3508.23	3767.16	5199.56	21177.6	1441.8	17863.1	12613.8	3691.94	6123.59	4455.64	4947.36	4001.22	11456.9	4697.3	4417	5235.87	5874.19	5628.61	5828.59	4887.6
M217T81	Arcaine	219.098	47.887	11479.1	12861.6	14920.7	13782.9	12292	6117.93	13704.4	14839	13783.1	13669.1	11438.1	15518.8	27540	14870.6	14044.2	31802.1	10389.5	14387	11622.3	10836.4	12570.7	17448.2	14133	8683.66
M144T281_2	Benzamide	89.1151	1472.17	4169.17	4538.78	4214.3	4510.51	5079.81	5260.26	4999.88	4530.03	4858.9	5958.39	4362.28	5199.72	5200.37	4430.54	4827.45	4846.18	4239.72	5438.38	4749.46	4643.38	4521.49	4788.57	4883.78	4880.86
M241T46	beta-Alanyl-N(pi)-methyl-L-histidine;N(alpha)-gamma-L-Glutamylhistamine	585.269	1210.98	15031.4	4522.21	8128.49	10189.3	15096.3	45304.6	19185.9	12028.5	11975.8	57405.7	50285.8	24642	5368.07	989.401	21299.4	2196.68	24155.1	6148.1	30373.1	42432.6	1068.19	1861.56	1417.99	1054.04
M235T643	Betaine	583.255	679.397	1145.81	1144.83	1518.91	2166.15	3408.59	7146.24	2971.25	1921.84	1073.4	4743.46	3989.74	2884.49	1659.52	1652.36	5176.1	1067.77	2405.51	491.876	4986.97	8168.22	2610.95	3105.91	5597.85	11516.3
M585T1211	Bilirubin	89.5066	1479.07	132186	130467	127456	125302	118937	124900	119278	109679	125967	128630	125680	123956	116850	125415	120250	125751	126411	120639	126558	123568	117607	125253	119933	113449
M583T679	Biliverdin	245.096	333.844	3663.15	6273.98	6689.78	3452	3781.95	3329.62	5000.95	9739.67	5555.22	5250.15	4818.71	4936.28	4424.81	4488.89	5173.44	7305.95	3543.72	3116.4	3015.57	4587.15	2997.98	5466.28	10309.9	2796.46
M245T334	Biotin	376.293	790.411	172254	131020	178461	205477	118023	174441	84055.7	226641	167914	182058	139436	94822.1	123776	117358	96524.7	107787	139338	102262	66008.7	91275.5	56376.1	165824	90110.8	59746.5
M227T46	Carnosine	391.284	618.687	567635	425421	568890	513523	107818	251206	119937	167955	474929	685422	497031	204700	384227	256936	204371	168085	620934	215160	49335.9	61463.5	153868	527495	230008	56216
M376T954	Chenodeoxycholate;3-Oxo-5beta-cholanate;Murideoxycholic acid;Hyodeoxycholate	316.285	882.155	16968.4	55615.7	62618.6	53248.8	64944.7	53814.8	91131.6	56639.6	40621.4	54350.2	59000.7	62869.2	45526.8	55951	80481.8	48630.5	57137.4	65763.7	67625.6	64336.2	73588	73673.2	82961.5	76662.6
M376T790	Chenodeoxycholate;Deoxycholic acid	277.216	894.158	18335.6	51784.5	35747	43545.3	86576.4	87156.7	80246.8	100883	52525.6	46895.7	51959.1	78289.3	34940.1	35388.1	79355.3	77592.9	72861.2	65266.8	78765.5	103000	148629	33499.2	78414.1	147922
M391T619	Cholic acid	655.276	673.431	11989.9	12688.5	18375.4	19397.9	15275.6	12181.2	26520.1	6303.56	15257.7	11596.2	9904.33	12021.9	6539.56	17099.3	15315.1	9933.06	10775.2	11339.3	10049.7	11655.2	12938.2	10325.5	13400.1	3716.99
M391T677	Cholic acid;3alpha,7alpha,12beta-Trihydroxy-5beta-cholanate	391.284	725.774	1.26537e+06	313622	250364	308414	1.0728e+06	1.13643e+06	983080	2.37307e+06	1.30701e+06	1.44347e+06	1.46509e+06	1.03466e+06	1.11957e+06	1.09502e+06	833884	865710	1.5417e+06	1.69282e+06	704025	968912	390767	721403	888779	509227
M132T46	cis-4-Hydroxy-D-proline;Hydroxyproline	296.258	909.165	2360.01	2621.58	3300.82	3520.23	2797.87	4693.65	3245.41	3268.47	3562.71	3863.73	2327.73	3390.9	1624	4372.49	2446.68	2226.79	2514.78	3187.11	2441.43	2296.69	2846.98	2572.92	3159.86	2643.34
M316T882	cis-9,10-Epoxystearic acid;18-Hydroxyoleate	89.9386	1479.07	2371.87	1790.88	1771.46	1516.48	1170.58	2147.65	1435.54	3020.03	1864.44	2761.7	1827.9	1723.47	1545.65	1033.03	2237.96	2213.11	2135.27	2199.36	1323.64	2107.5	2395.34	1779.35	2338.64	2130.9
M299T972	cis-9,10-Epoxystearic acid;18-Hydroxyoleate	244.093	48.929	8727.86	10815.9	14642.4	14148.3	16249.3	11131.9	11087.6	14912.2	12056.7	11623.1	15008.8	14561.7	12352.3	23338.4	15102.2	11167.2	11326.3	15572.6	12186.6	12724.5	19506.9	13107.9	16491.4	15816.2
M277T894	Colneleate	355.117	1039.76	9330.32	8536.05	6120.3	6308.17	7025.93	7095.3	9765.86	9582.75	8741.85	8969.4	5885.05	6603.36	7006.77	8385.68	10176.5	10483.8	5341.86	6456.05	6711.71	6463.79	10326.1	8127.24	11075.3	9937.37
M655T673	Coproporphyrin III;Coproporphyrin I	375.289	790.411	621050	482679	652644	761492	419794	619032	289126	765933	585593	632779	475100	330383	428741	404498	329871	360992	504172	372516	241464	318592	201629	620763	298827	203216
M261T861	Crepenynate;(6Z,9Z,12Z)-Octadecatrienoic acid	262.225	860.648	1684.87	1431.85	2314.85	1529.39	2577.93	1958.57	4334.11	1728.01	2533.31	2257.46	2825.36	2390.58	2487.2	1862.32	3232.55	1751.18	3252.51	2417.64	3099.36	3119.33	4688.17	2222.01	3712.81	5882.68
M261T734	Crepenynate;(6Z,9Z,12Z)-Octadecatrienoic acid	234.153	127.592	363.972	532.532	616.604	955.918	483.284	548.09	1014.02	603.076	508.383	557.307	818.579	1001.65	1783.56	625.093	811.871	333.121	677.006	598.722	635.191	711.232	218.589	299.298	234.998	1228.6
M296T909	Crepenynate;(6Z,9Z,12Z)-Octadecatrienoic acid	90.0077	1479.07	15097.7	14222.4	13464.8	13871.3	14073	13912.2	13934.8	13997.2	14895.2	14894.3	13773.9	14246.2	12693.5	13282.9	14035.4	13076.3	14186.3	14684.1	13926.4	13699.6	13547.4	14155.2	13493.2	12628
M244T49_1	Cytidine	116.07	47.5685	17432	20651.5	16298.5	23818.5	19686.8	25780.3	22980.9	25992.8	18434.5	29556.5	32211.1	23015.4	46092.2	21624.3	29588.2	25650.8	30489.4	24298.7	20558.7	21099.1	27187.3	75185.3	42098.2	31091.4
M355T1040	Demethylcitalopram	90.0545	45.6095	3834.74	5930.37	5961.97	4442.88	3799.84	5910	6297.73	8220.06	6426.46	7126.62	6726.35	4349.34	18509.5	6581.45	8111.33	12296.4	5681.52	3853.32	4101.11	4234.93	4977.26	14751.3	11262.1	8968.49
M375T790	Deoxycholic acid;Chenodeoxycholate	591.317	702.292	11879.3	4417.01	6483.26	5355.23	6033.89	12023.3	4198.93	9243.88	8213.3	16003.1	8943.51	8118.43	5410.29	3223.44	5626.08	4728.84	10621.7	3645.7	5418.09	8445.56	2192.84	4896.7	1744.81	1741.34
M233T84	Diethanolamine	432.31	761.869	4760.41	5690.6	5958.04	6029	6859.91	8549.67	6056.63	8143.66	5624.44	6320.1	6322.95	5214.92	8716.58	7612.45	3039.11	4654.15	4776.14	9536.96	2981.63	5156.26	6431.67	6234.63	4855.49	5725.86
M234T128	Diethanolamine	90.5067	1479.07	36872.1	39807	40736.6	40112.3	40723.3	39465.2	43225.3	36900.9	39785.6	38868.6	38887.2	39780	37921.7	39126.9	40991.1	39726.3	40133.9	39901.4	40856.3	37974.6	39879.1	41728.9	42967.9	39068.9
M219T83	D-Lysopine	221.112	45.863	2257.91	3368.42	7177.44	7148.51	7904.34	6167.22	4729.7	3923.89	2718.96	2592.54	3876.22	2589.33	5060.73	3490.95	7999.76	4760.62	4168.39	7628.99	5303.54	3626.85	9369.09	6773.34	9461.54	3879.69
M116T48	D-Proline;L-Proline	284.099	88.921	3773.12	7353.41	9324.78	10035.2	6265.32	6748.47	10839.8	6320.82	5044.32	3466.78	5814.04	5109.72	51947.4	12713.1	14278.4	25243.4	7096.88	6370.76	5145.94	7408.71	3909.11	14802.8	3429.58	12955.2
M589T520	D-Urobilin	589.409	866.019	939.739	838.966	1328.15	1414.25	1718.27	1994.38	1652.03	994.718	974.826	2125.77	2578.47	2839.51	1351.94	1778.31	1362.53	572.928	855.206	1003.53	1148.62	912.35	2945.83	1648.54	1296.11	2345.08
M591T702	D-Urobilinogen	90.5255	40.945	1824.93	1527.63	2576.41	2626.06	2196.76	2721.49	1712.21	3071.18	2745.19	2436.88	1757.67	2241.74	2792.73	1950.6	2963.88	1534.36	2215.34	1864.52	1716.53	2029.53	2398.59	3651.09	3137.77	3524.4
M439T310	FMN	163.058	281.318	16408.3	34052.8	34173.1	41987.2	42900.9	45476.4	40543.3	48128.1	39757	36384	32997	42968.1	42900.6	43407.4	41630.6	45099.1	36464.3	43597.4	47266.9	41739.5	51063.3	52126.2	55211.4	51205
M267T87	gamma-Glutamyltyramine	268.172	218.598	1605.43	1521.59	2090.46	1269.64	1403.25	1811.45	1176.49	2376.69	1874.01	2282.89	3369.14	1856.43	1177.25	2093.21	6103.23	2074.18	1939.44	1519.13	1920.12	2271.53	2967.63	1704.34	4262.57	2742.57
M432T762	Glycochenodeoxycholate;Glycodeoxycholate	176.07	441.147	1831.65	5439.96	8468.06	4424.5	3821.12	5541.95	3740.42	7505.99	6475.82	4069.22	3837.97	3635.7	13754.1	5776.9	7768.46	9759.05	2495.2	2823.98	2323.7	3426.12	6490	13537.9	9164.98	6263.23
M432T610	Glycodeoxycholate;Glycochenodeoxycholate	432.342	651.769	3739.37	4330	2840.24	1661.49	3079.92	2674.93	1401.39	5147.93	905.422	1371.03	2446.34	1717.86	2407.29	1934.1	2986.14	5499	4728.72	1196.7	2043.6	2138.62	2702.6	2058.24	5332.5	2129.67
M284T89	Guanosine	269.088	89.6205	5627.83	12979.6	30725.5	10919	13656	18921.2	12683.5	7752.49	7451.66	13337.6	22445.4	9030.9	77705.2	35336.8	27602.7	92726.4	18245.7	14525.4	8360.73	9081.65	26935	13715.9	19716.7	20381.9
M162T281_2	Hippurate	753.602	930.896	4087.41	4300.21	7579.44	11630.8	8680.84	13590.5	4841.72	6845.72	13634.7	16855.6	12381.6	12705.1	8687.99	14326.7	8661.23	6013.25	16428.5	13526.7	8052.61	8357.72	7755.35	11596.1	8045.12	6268.59
M163T281	Hippurate;4-Methylaminobutyrate	90.5253	1478.15	2174.9	1928.27	37460.6	1058.76	662.567	1643.23	1210.61	554.248	2005.95	1508.96	1512.18	37775.1	1439.99	629.315	1020.25	974.379	1201.87	819.521	39928.7	1270.75	39048.9	766.132	1257.6	1308.31
M112T42	Histamine	593.333	701.266	271488	126656	151370	101607	122265	381910	77673.4	227896	253640	583239	228640	170472	81099.2	59233.3	79987.5	85343.8	175198	58197.5	114967	184883	28403.7	166152	11289	2306.44
M137T93	Hypoxanthine	210.077	50.433	6403.3	7726.73	9149.86	8456.1	10099	7511.52	8867.34	8997.91	6964.51	6467.63	5943.12	8691.6	5676.76	8201.24	11211.4	7102.2	5823.49	6385.98	6034.79	6990.42	12385	8582.68	6801.76	11503.4
M217T50	Iminoarginine;L-Capreomycidine	219.018	62.777	785.45	809.664	671.492	693.595	777.28	1369.35	1107.34	691.248	813.594	1422.68	520.453	793.745	1869.86	994.626	4303.81	1068.04	1498.2	1232.07	2711.56	3258.86	1479.37	4985.92	2182.5	8714.97
M176T441	Indole-3-acetate	148.06	81.251	3321.4	4933.34	7267.48	7614.85	2764.47	2099	4188.07	8778.4	3877.41	5362.94	12360.4	6473.79	19561.7	2105.78	4149.77	5192.04	2676.15	9083.14	5697.12	5335.99	2303.39	4184.14	3240.86	3109.85
M269T90	Inosine	263.237	882.156	23668.6	83376.2	103124	85214.9	101415	90565.1	136561	90977.4	59624	89629	97097.3	103913	75210.2	82606.6	128679	76944.7	90561.1	101229	110347	102791	118726	172922	129707	134731
M754T931	Isolithocholate;Lithocholic acid	90.9026	1479.07	1479.11	775.678	850.661	944.065	1160.89	1346.26	1314.67	1275.34	819.787	1044.55	1708.77	1398.33	1141.55	919.389	1268.2	1568.88	1344.37	579.261	1067.79	1291.46	1219.07	1154.88	1486.5	1348.91
M593T701	I-Urobilinogen	90.9472	1480.03	1721.66	1139.41	1484.14	1309.65	1676.76	1541.53	1600.58	2151.46	1277.3	1442.47	1421.48	1389.65	1101.07	1748.82	1829.9	1152.96	1477.69	1123.65	1687.14	1649.12	1400.12	1538.71	1224.66	1399.02
M184T152	L-Adrenaline	132.102	83.654	26670.3	54657.6	61447.5	53394.2	42126.1	73853.4	59296.1	64746.8	59634.1	46222	63521.9	46745.4	244273	95728	61511.2	117633	72356.9	51911.5	54942.4	37651.4	49911.3	142622	64607.9	96398.1
M175T47_2	L-Arginine	359.294	930.889	149002	144700	184073	256604	211851	273632	139007	193639	270996	297454	229975	234997	198221	250157	189168	156648	287497	267332	198975	192068	207778	243267	167743	162628
M210T50	L-Arogenate	150.058	65.1905	7014.82	11362.6	18068.7	19285.6	9302.6	16175.1	12320.7	11174.5	13477.3	14064.9	10752.7	12157.5	61977.6	25208.4	43773.2	28613.3	18226.9	11108	14416.4	8255.98	9106.11	29435.5	14362.6	58672.3
M245T49	L-Arogenate	246.153	381.104	9752.06	10445.1	11790	11400.3	12723	11966.9	13845.5	13192.4	10706.3	10338.4	16713.3	11188.4	11450.4	12132.5	12016.4	12682.9	9202.36	13123.3	11051.1	10119.9	15341.3	11024.6	9879.51	10799.8
M148T419	L-beta-Phenylalanine;D-beta-Phenylalanine	166.086	114.912	20942.1	46420.2	62171.6	51382.8	44657.7	70570.4	49532.3	68150	51457.5	45194	78524.4	52316.9	323671	57342.4	75532.1	99350.4	68873.7	42628.3	50263.1	40804.3	47698.5	167489	87591.1	81414.5
M195T50	L-Capreomycidine;Iminoarginine	198.123	89.864	2499.89	3409.15	12288	3509.72	6945.28	10820.7	6925.32	6044.11	4746.24	11058.4	4846.62	12317.6	10141.8	12890.7	5671.05	6843.38	2917.25	3555.43	11844.4	4684.93	5798.36	5131.82	5609.79	7010.03
M187T47	L-Cysteate	102.055	45.688	5688.31	4814.85	5375.99	3131.81	5794.93	6188.85	4889.19	11328.2	7807.97	4196.25	6732.09	7287.16	20075.7	7662.79	5493.52	29458.2	6230.34	7407.77	5223.56	5911.62	6344.21	11445.9	6249.71	2150.74
M148T81	L-Glutamate	91.0079	1479.07	4105.22	3594.76	3663.03	4822.73	4782.21	4425.88	4052.64	4478.92	3993.77	3442.64	4046.84	4239.3	3839.49	4315.7	4415.5	4497.98	3179.06	4167.57	4521.83	4077.82	3407.72	4011.98	4786.33	4232
M156T45	L-Histidine	182.081	82.356	42608.5	61686.2	70953.8	66906.5	55460.8	83642.8	82812.1	89699.1	75461.7	56761	68988.4	70600.1	267731	97021.3	88055.3	113138	69668.7	58050.7	55622.8	67401.6	60545.8	145033	76003.8	90335.4
M263T882	Linoleate	618.333	705.01	31176.2	5836.15	7189.47	2585.08	3979.49	9684.85	6074.13	9337.3	12518.5	8019.7	6229.52	7622.91	3440.38	7016.25	3887.98	10941.1	5843.6	8048.69	8670.41	7611.15	1278.31	5209.06	1407.08	728.405
M263T1021	Linoleate;9-cis,11-trans-Octadecadienoate	190.086	509.315	1147.7	1925.99	3956.4	1512.31	2704.36	4554.64	1956.06	3809.23	4534.86	1333.8	1931.27	1787.95	11812.6	3801.67	2058.04	8591.69	2365.64	3790.47	1093.47	999.808	1715.87	9301.32	2194.92	1440.98
M359T931	Lithocholic acid;Isolithocholate	153.065	96.005	1408.65	3092.19	3847.23	3066.74	4105.13	7363.46	2971.67	3844.86	2149.6	3129.93	2563.19	4502.6	4773.81	2513.65	20221.4	3772.19	4365.18	2150.21	4619.75	5129.55	5418.66	4579.77	12981.6	90890.3
M150T52	L-Methionine	156.138	1472.19	2069.1	2313.39	2239.17	2134.07	2367.7	2414.88	2376.94	2296.21	2511.57	2554.58	2467.96	2468.22	2751.15	2148.32	2654.7	2636.29	2101.58	2463.76	2397.7	2361.93	2228.9	2198.15	2629.82	2440.07
M150T65	L-Methionine	174.055	340.651	9206.68	71687	99969	132495	149501	119530	109960	113353	86495.4	51824	67079.3	93355.2	113297	100044	170339	27942.4	47193.3	34633.1	77832.6	76418.8	100324	64329.6	120892	119117
M166T46	L-Methionine S-oxide	265.253	941.937	42098.6	20090.2	17143.7	14492.2	23284.1	21579.3	35628.4	60617.7	37799.6	48761.4	46083.6	34545.8	25631.9	16168.5	8450.55	58664.7	35140.7	36139.5	15465.6	19421.7	9408.03	65122.8	43001.5	22507.2
M132T84	L-Norleucine;L-Isoleucine	158.045	66.219	1480.09	2650.73	3976.46	2768.49	1373.18	2536.79	2700.02	3887.07	4134.84	4024.52	2848.4	3652.86	5608.62	4850.92	5464.79	4890.06	3276.99	2639.47	1403.17	1655.24	1500.59	3044.02	3802.97	5766.12
M133T85	L-Norleucine;L-Isoleucine	143.959	1479.07	50409.4	52127.3	52241.8	52055.9	54844.2	55766.2	53280.1	56031	51407.6	50801.3	52812	53009.3	53007.5	55296.6	55221.9	55756.3	51583.2	53379.3	59625.1	58841.2	59321.6	55071.5	58678.2	57150.8
M166T115	L-Phenylalanine	208.098	380.454	1042.53	2183.98	2015.74	1498.34	1980.54	1902	1975.64	2561.33	1900.59	1410.85	2003.98	1736.17	3773.6	2713.42	2002.32	3174.47	2038.65	1341.91	1452.69	1694.78	1485.24	2377.49	1910.88	33492.4
M130T62	L-Pipecolate	140.071	49.15	4832.48	9231.05	8562.05	4300.76	8410.37	9384.93	7056.88	10306.7	4700.74	4171.03	7446.1	8124.65	7252.1	10899	6893.79	6549.07	8069.64	6436.54	9060.45	7576.25	6779.3	8756.73	6632.45	6059.91
M130T79	L-threo-3-Methylaspartate;3-Aminopentanedioate	219.113	346.498	1066.17	2003.61	3059.94	3401.72	4240.45	3350.64	3518.32	5614.82	2364.33	2103.08	2298.74	3892.92	5638.74	1778.2	3265.29	3507.43	2225.77	2095.97	1108.51	1874.55	4367.39	3300.5	4451.49	4078.43
M102T46	L-Threonine;L-Homoserine	385.143	434.631	32957.6	13145.7	18199.6	13483.8	9578.43	11117.8	18813.8	23353.8	17861.5	21392.3	14143.8	17591.8	7117.27	10398.1	14002.6	9473.61	11485.8	10093.6	15828.1	16060.5	8187.1	7760.83	15846.1	8497.06
M120T46	L-Threonine;L-Homoserine	129.934	1479.07	420.863	558.797	909.983	767.399	657.92	769.677	651.505	630.815	297.975	525.413	463.139	811.614	834.657	1182.07	785.879	923.804	958.877	831.452	868.071	1069.89	883.504	1010.05	775.486	676.741
M182T82	L-Tyrosine	123.055	68.075	2359	2646.9	5615.14	5376.71	5003.62	6579.43	12029.8	11652.2	2922.23	7083.26	5660.33	7448.87	3603.26	5056.9	8645.62	4711.84	3867.49	3021.53	3950.38	5263.01	6697.09	2114.88	6797.31	4550.18
M243T443	Lumichrome	282.279	1072.64	126699	139026	165626	157071	137170	171641	165582	182298	164177	170286	228012	196310	151099	190905	246500	139853	199971	183667	167113	167975	166162	196594	196459	181543
M618T705	L-Urobilin	91.0136	40.9275	2892.56	3379.46	4939.09	5347.14	5287.03	4116.14	4717.75	6226.42	4726.2	5440.17	3848.81	4985.33	6176.29	6847.77	4552.05	4415.35	3729.86	4918.62	5149.76	4485.9	9620.28	5968.3	5197.86	6527.27
M100T48	L-Valine	202.108	137.323	3168.38	7402.16	9556.97	3059.62	4443.17	4388.53	4043.96	8488.56	7424.86	3938.86	3484.97	2977.1	10234.6	6545.52	3363.36	21403.9	2923.54	5286.35	2300.46	2358.86	2368.12	5952.58	3355.97	9389.12
M190T509	Methyl (indol-3-yl)acetate	91.5044	1479.07	14860.9	15250.8	16919.9	16178.5	16943.8	18280.1	17688.5	15489.7	14912.3	16155.4	16095.7	15111.3	15622.1	15236.2	16089.7	16920.6	15971.9	15300.3	16439.8	16393.8	17466.8	16127.3	15919.7	15657.1
M190T579	Methyl (indol-3-yl)acetate	206.139	137.906	20009	17567.3	19181.3	18390.3	2931.61	6805.74	11069.5	17772.6	6102.59	6187.91	8867.36	3223.54	4148.84	5592.59	19129.1	25051	6192.73	42735.7	6853.45	5412.14	12014.6	14161.4	7442.68	20138.2
M415T972	Murideoxycholic acid;Hyodeoxycholate;Chenodeoxycholate	415.32	679.471	43624.6	20488.3	25644.3	20364.2	14781.8	30719.6	19474.9	36957.6	17567	20299	35385.5	15512.6	12367.8	13628.1	11526.7	12815	11422	15047.6	24935.3	20997.7	11655.5	14989.9	13801.9	7865.42
M143T48	N(alpha)-Acetyl-L-2,4-diaminobutyrate	149.132	370.02	1101.14	1731.29	4024.53	2396.33	7815.86	7379.5	1995.93	3670.9	2829.05	1879.18	1481.35	3234.37	1774.7	1810.96	10203.3	2050.78	6958.08	2654.27	2265.94	6346.34	13439.8	2025.24	1901.78	7611.86
M170T44	N(pi)-Methyl-L-histidine	121.064	370.395	1693.1	7304.11	4727.94	6046.3	6045.04	5432.58	5680.11	3328.37	4284.72	3881.31	5088.99	5360.89	6156.86	5640.58	6355.93	4523.25	4931.73	5676.77	5830.14	5780.46	7870.63	5668.15	5505.86	5905.53
M153T96	N1-Methyl-4-pyridone-5-carboxamide	91.9949	40.927	810.853	1044.49	1356.97	784.637	1196.14	573.232	759.19	1283.27	12.782	1086.18	508.636	974.705	1114.81	1257.7	1073.58	842.498	521.165	637.073	889.547	769.844	671.872	957.085	1129.2	768.855
M275T331	N2-Succinyl-L-arginine	194.081	317.381	1091.02	4376.48	5329.34	4513.78	5122.33	9298.77	2576.38	5417.78	4419.13	4990.53	5086.89	8838.89	4741.14	5170.08	35497.2	6391	3811.3	4564.41	5198.95	4956.54	2086.62	1507.46	14466.9	325585
M174T341	N4-Acetylaminobutanal	92.0053	1479.07	1868.25	2287.9	1986.98	1725.21	1944.21	2087.2	2015.35	3166.47	1704.07	1988.87	2285.07	1986.01	2003.58	2448.22	2423.87	2351.78	2206.07	2750.98	2000.95	1586.56	2361.9	1315.81	2564.75	2362.65
M187T48	N5-(L-1-Carboxyethyl)-L-ornithine	149.059	372.952	1253.65	1545.32	2587.46	6842.84	6124.2	5861.74	7778.51	1872.64	1836.87	5262.65	6782.6	4753.69	4325.11	3841.28	8621.41	2197.17	5766.64	4550.98	8343.71	7715.08	13047	5086.16	6097.81	6202.02
M189T49	N6-Acetyl-L-lysine;NA	347.131	434.191	2650.31	2677.6	2987.51	2105.07	2716.43	2406.96	3773.32	3453.57	2246.98	2175.55	2368.45	2896.3	2017.32	2720.95	3230.35	3710.49	2940.39	2343.16	2582.31	1355.81	3151.41	2274.35	2920.18	4856.3
M265T942	NA;(9Z)-Octadecenoic acid	170.081	79.404	3189.93	5952.43	6010.19	5516.29	4876.59	5134.36	8103.03	4353.1	4629.71	4279.16	6644.27	4610.97	8282.21	6511.21	8432.56	3581.25	5348.03	4867.74	4942.67	6930.99	3640.3	10387.2	9193.85	10363.3
M171T49	NA;N6-Acetyl-L-lysine	179.107	381.159	3434.46	5519.35	5705.08	4868.41	4749.3	4643.24	5479.2	8331.47	6275.26	5282.69	5049.53	6369.25	7844.99	7236.83	8280.48	7960.34	4626.6	5739.33	8110.72	7005.19	7961.48	6483.95	11478	7279.45
M158T66_1	N-Acetyl-L-aspartate	498.288	510.942	4172.27	3126.97	5828.88	9749.72	5329.98	8000.03	3856.83	24109.2	6744.28	7470.49	11806.4	2580.06	6759.15	6219.47	12279	3354.25	11703.4	2457.97	8895.87	9035.16	8932.43	12550.4	4561.52	10873.7
M200T82	N-Acetyl-L-citrulline	202.18	373.546	1680.75	1690.9	1604.89	1472.09	1330.56	1975.04	1643.81	2646.96	1690.19	1794.63	1517.68	1632.97	1249.17	2322.45	899.416	1992.41	1021.93	1317.11	994.931	1071.5	757.002	1535.05	441.195	335.281
M208T380	N-Acetyl-L-phenylalanine	92.0147	40.927	946.599	999.488	1356.97	1577.9	1109.7	1150.52	1044.43	847.227	890.865	1114.72	1002.42	790.625	1543.56	1116.94	1061.95	1160.88	1039.56	1331.63	788.987	1126.43	2205.39	1398.39	1633.63	894.277
M225T511	N-Acetyl-L-phenylalanine;N-Acetyl-D-phenylalanine	500.304	558.131	5018.88	3691.35	4186.4	8462.65	9476.7	15944.2	4671.68	83907.1	6895.51	11428.2	11915.6	5436.32	14453.2	12694	31177.3	4490.54	13548.8	2149.76	16443.1	17536.9	12691.4	23120.1	9222.26	13794
M131T49	N-Acetylputrescine	243.098	121.514	5050.4	5994.97	8935.81	5838.9	4050.28	5065.49	7486.44	8107.54	3714.48	3861.56	5650.58	4854.53	23630.2	7183.67	8859.46	11119	5050.62	4534.02	4047.87	4783.64	6569.92	10319.3	5066.49	13668
M219T346	N-Acetylserotonin	127.05	121.55	3459.95	5023.42	6813.56	3375.88	2569.72	3883.31	6682.58	6682.15	3015.46	2894.16	5260.03	3254.86	19890.7	6298.59	6898.47	9622.17	4322.42	3553.69	2507.9	3095.94	4943.91	8381.68	4338.86	10556.4
M192T339	N-Benzyloxycarbonylglycine;p-Hydroxyphenylacetylglycine	161.107	245.642	780.153	802.993	977.944	915.745	643.09	785.898	967.345	943.491	2525.94	1250.68	1051.7	1415.46	450.172	592.894	884.087	734.61	535.752	482.987	716.053	980.195	5503.79	5664.51	15067.5	13379.8
M386T434	N-Hydroxy-L-phenylalanine	386.247	488.036	5715	4568.56	5093.32	5966.63	7013.3	5225.01	6297.99	8003.86	9063.88	5351.36	4810.83	6168.46	6926.26	5885.19	8768.94	11899.4	4106.61	6652.41	14599.3	5309.64	3713.77	7187.03	22340.5	9304.06
M385T435	N-Hydroxy-L-phenylalanine	138.091	85.223	5240.11	5070.98	6438.51	5770.38	4839.03	5453.16	5973.76	5373.45	5386.4	4448.75	1216.68	5272.32	5297.12	5280.46	6810.48	6508.95	5175.53	6497.14	6049.18	6138.65	1925.56	6742.49	9313.68	10934.4
M123T68	Nicotinamide	113.034	65.355	8537.37	7195.97	6660.49	4306.51	5515.42	5104.96	6041.5	12533.4	16824.7	11648.3	6102.36	4589.61	14542	9912.2	3857.82	13427.8	6040.7	6859.39	2456.28	2296.99	8385.85	10854.8	3645.55	4422.48
M124T67	Nicotinate	169.036	74.371	6051.22	7956.69	5026.69	6360.41	9542.83	12682.9	15207.5	17109	15923.1	12829.1	8296.8	8551.45	8724.79	12710.4	8429.44	6499.79	15236.2	11941.9	6386.1	5378.19	547.724	6645.22	10362.1	22435
M229T152	N-Methyl-L-alanine	591.317	522.951	146339	244251	389587	415499	584242	870060	259630	732094	406787	911420	421238	195631	469773	207562	355398	127699	426762	308293	632690	643401	338744	556623	420345	568435
M184T260	N-Methyl-L-glutamate	153.041	81.914	12412.3	18624.5	11760.8	5565.19	6756.67	11609.8	7683.39	12053.1	13127	9319	11190	7906.67	50071.8	16157.4	5449.03	81239.8	10141	13329.2	5813.04	5123.08	1193.63	25686.6	8001	9354.17
M295T780	Octadec-9-ene-1,18-dioic-acid;9(S)-HPODE;Colneleate;8(R)-HPODE;(9Z,11E)-(13S)-13-Hydroperoxyoctadeca-9,11-dienoic acid;(9Z,12Z)-(11S)-11-Hydroperoxyoctadeca-9,12-dienoic acid;(8E,10R,12Z)-10-Hydroperoxy-8,12-octadecadienoate;(8E,10S,12Z)-10-Hydroperoxyoctadeca-8,12-dienoate	285.083	103.739	5009.63	2064.22	2514.85	1768.67	3667.18	1314.4	1111.33	1529.19	3722.59	3662.59	3757.33	4994.94	12720.7	3564.27	3024.51	20469.6	1888.66	2557.2	3735.99	4294.57	2472.26	4448.25	1185.68	3653.83
M282T1073	Oleamide	206.045	250.769	287.844	343.072	566.206	2169.21	1069.03	2731.42	4884.99	1027.39	199.404	2252.9	2583.32	2552.4	3073.88	1712.45	9649.91	608.098	2422.77	1068.71	2694.2	2871.15	1769.25	1922.48	3078.01	24842.3
M272T295	Ophthalmate	80.9401	1478.12	3322.95	3706.14	3205.24	3293.82	3101.58	3386.47	2585.7	2998.15	3353.29	2986.72	2943.36	3034.91	2955.33	2916.3	3113.98	3196.83	3403.33	3878.84	3022.26	2549.45	3149.94	3426.34	3378.59	2584.83
M202T137	Pantothenate	92.5032	1479.07	2932.65	2894.73	2314.13	2277.8	2821.86	3177.6	2438.51	1783.76	2768.39	2384.04	2560.34	2834.69	2170.66	3344.14	2294.76	2679.58	2445.33	2160.25	1837.77	2903.91	2678.66	2461.58	2619.14	2714.23
M206T138	Pantothenol	93.0113	40.945	479.073	477.107	1341.63	1287.06	1012.87	784.402	779.032	1241.28	577.008	1111.26	491.322	1283.71	1866.82	1326.01	1330.92	928.851	1065.32	1113.08	824.916	830.455	1923.37	1065.6	1237.12	1707.15
M194T118	Parapyruvate	197.117	538.662	4756.16	4875.3	4935.96	5709.28	5867.62	6145.11	6502.93	6142.18	5099.08	4768.86	6519.19	5323.16	7691.83	5673.7	5599.34	6123.45	5727.6	5111.79	5360.48	5522.57	6818.7	5891.6	5710.03	5373.31
M144T245	Phenethylamine	151.039	529.095	1234.13	2564.91	2050.45	2066.19	2512.29	3329.8	1962.51	4377.9	1737.09	2557.48	1362.54	1641.32	1344.77	2058.11	1845.45	2237.7	1508.16	1828.07	1604.26	1601.01	1377.3	2397.85	1579.13	1726.49
M121T370	Phenylacetaldehyde	95.0599	41.8915	4971.74	4679.84	6115.59	6183.38	19493.5	7762.33	7049.41	6750.62	5525.82	6172.97	7320.23	7836.11	11395.5	7974.16	13808.7	6600.04	4176.01	7396.75	7200.74	7691.17	18975	5916.41	26223.7	16331.8
M295T464	Phenylacetic acid;4-Hydroxyphenylacetaldehyde	81.5204	1479.07	11491	9551.41	8259.13	9522.03	7516.65	6971.13	7930.4	5747.1	8756.33	11454.4	9642.02	7263.04	6192.82	8184.02	7320.61	8292.24	10639.8	9619.95	7939.96	8062.33	7393.27	7522.92	7605.31	5877.66
M194T317	Phenylacetylglycine	81.5203	40.9465	9869.95	8535.67	14230.6	13502.9	12364.8	15250.1	11536.1	17130.4	14023.4	13304.9	10737.8	11655.2	18029.9	13434.8	14132.6	10643.1	11065.1	11371.5	12787.4	14096.4	16075.7	18459.6	17307.4	16520.6
M267T501	Phenylethyl alcohol	81.9371	1479.07	50915.8	47073.1	45685.3	49203.9	48437.2	48197.5	48706.7	44949.4	46965.7	48070.3	45454.4	47712.9	46236.8	47645.8	46202.8	45507.4	48412.7	48743.6	50165.6	48438.3	47911.2	48615.9	43672.1	44657.4
M167T370	Phenyllactate	81.9983	1479.07	1583.03	1676.55	975.272	1101.46	846.838	1170.8	1330.38	1064.83	1182.16	1101.57	1218.75	1406.72	1141.72	1056.57	955.742	1061.76	972.878	1096.46	986.865	1311.62	1038.86	1329.08	1201.83	901.643
M346T435	Phenylpyruvate	82.0134	40.9365	19153.2	28157.2	29679.3	32886.1	33037.8	28844.5	30587.1	36229.3	36009.2	33064.8	27709.5	33205	47225.9	43315.4	42063.2	29277	27514.2	35153.8	34930.4	32025.1	50561.7	44816.2	37515.8	42118.9
M347T434	Phenylpyruvate;4-Coumarate	95.9527	1479.07	7291.45	6996.38	6527.42	7261.81	7472.14	7079.94	7738.78	6513.69	7532.91	7464.09	6563.21	6654.42	6568.39	6807.2	7696.06	7006.45	6117.25	7000.68	7628.01	7616.9	7814.08	7254.57	7043.65	7580.55
M168T67	Pyridoxal	173.117	513.759	4602.21	5260.95	4857.41	5216.83	6856.42	5355.02	5940.52	5249.99	4277.76	5225.86	7073.47	5238.16	5116.3	5408.1	6602.25	5829.35	4745.81	5244.2	6145.38	5288.6	6922.84	5890.61	8254.8	5946.27
M170T79	Pyridoxine	82.5369	40.9485	6152.34	11212.1	11393.4	11000.9	9907.03	8747.83	9019.16	12558.7	12363.8	9123.52	10648.8	11512.9	12127.6	12995.2	11299.2	10454	9186.43	13124.4	11802.7	11040	17778.2	14152	12063	13105.6
M377T345	Riboflavin	82.9384	1479.07	2426.89	2317.3	1866.59	2427.58	2420.26	2298.31	2228.12	2446.97	2184.65	1487.11	1907.82	2216.39	2242.48	2125.2	1488.06	1806.58	1337.02	2219.96	1488.44	2179.35	1942.12	2114.5	1296.23	2141.61
M179T381	Sarcosine	95.973	1479.07	4067.24	4519.09	3912.53	4142.12	3758.65	4247.02	3821.67	2931.13	4228.68	4927.07	3647.43	4013.19	3739.65	4215.55	4215.43	4352.52	4276.38	4872.3	3788.47	4046.86	4345.96	3847.57	4131.17	3772.97
M177T103	Serotonin	182.081	389.211	4600.2	1389.4	2150.51	1746.08	1870.64	2113.8	2057.96	3003.03	1479.06	2479.59	1615.84	1803.72	1042.74	1570.73	1790.63	1690.02	1349.11	940.256	1873.33	2725.99	2117.4	1410.75	2201.38	1835.73
M105T502	Styrene	82.9963	1479.07	26773.3	20495.9	19481	19973.8	21855.6	22570.4	18178.8	17347.9	21059.5	23055.7	20910.5	21172.8	21222.2	18323.1	19652.1	20859.4	19575.7	19311.4	21972.5	21001.3	18813.1	19463.7	18375.5	18427.8
M533T558	Taurocholate	83.0144	40.949	3308.93	4836.37	5380.79	6744.44	5103.3	5232.64	5877.35	6317.77	1940.87	5124.47	4437.24	1476	7706.94	7850.4	6991.08	5703.08	3855.53	4784.94	5085	6252.09	8987.46	7328.94	7348.15	7730.99
M498T511	Taurocholate;Taurohyocholate	83.0375	41.918	1490.29	2315.79	3172.71	3212.37	1849.29	1814.27	2170.56	2729.49	1624.47	2428.78	2309.47	2799.44	4733.23	2910.32	1862.56	1858.51	2468.53	3409.49	2146.62	2697.71	3316.41	3336.63	3492.37	3936.67
M500T558	Taurodeoxycholate;Taurochenodeoxycholate	83.4972	1479.13	1692.31	1730.97	1888.41	1460.43	1382.93	1493.83	1691.79	1166.43	1198.27	1838.85	1934.69	1627.06	1854.71	2045.8	1506.39	1714.32	1901.56	1875.36	1746.79	1612.82	2093.16	1941.4	1698.72	1990.63
M516T510	Taurohyocholate;Taurocholate	83.5357	40.9245	1154.21	1390.43	1684.17	2238.62	1982.31	1382.92	1798.58	2364.7	2226.03	2111.37	991.107	1885.59	1957.86	2104.22	2306.47	1887.76	1455.42	2191.12	1555.16	1138.59	2978.32	2346.03	2148.97	2711.03
M243T122	Thymidine	83.9965	1479.07	11381.3	10703.9	11331.6	11432.9	11334.9	13341.3	10376.5	10023.9	11243.4	11720.3	11792.8	11428.8	11771.3	10523.9	11095.9	12116.4	10035.1	11161.1	11862.6	11868	12377	10871.8	10610.4	10955.2
M127T122	Thymine	84.0109	40.948	3167.8	5377.87	5790.1	5763.5	4674.47	5041.4	5308.45	7221.92	7859.51	5980.54	4787.66	4626.99	7737.84	7925.26	6887.35	5390.66	6620.36	5589.04	6419.15	7202.24	9228.1	7068.14	7434.31	7110.46
M149T373	trans-Cinnamate	84.0439	45.688	5286.51	6595.52	6888.59	2781.17	4170.4	5282.16	5400.95	9773.9	7997.5	4885.82	3402.19	7011.91	20298.6	9725.03	3912.7	30857.1	5452.84	9079.12	4499.23	4231.43	9467.51	12836.3	6043.25	1902.52
M161T246	Tryptamine	84.044	79.522	1397.29	1704.39	1750.9	1542	1268.11	1413.18	1552.02	2904.71	1435.45	1288.17	1931.95	1290.09	3148.47	1597.13	1372.76	2619.08	1519.64	1259.16	1088.51	1146.27	203.322	1446.56	1572.08	5303.71
M138T85	Tyramine	84.0803	42.891	4076.4	6854.79	6704.71	7114	7273.43	6803.75	7633.86	7536.63	7558.61	7831.12	5829.59	8363.8	10414.5	6623.27	5049	4816.89	3813.47	7937.08	7085.61	6105.26	5183.98	6509.17	4124.54	8005.1
M113T81	Uracil	84.9455	1479.07	1886.95	1774.76	1186.91	1756.07	2113.49	2296.15	1293.53	1220.28	1592.11	1659.25	875.085	1726.14	1289.62	1896.36	2075.28	2075.41	1736.75	1568.87	2220.92	1903.37	1472.82	1736.36	1888.16	1567.27
M113T65	Uracil	96.9604	1481.94	3824.16	7122.46	4621	4651.74	3945.58	7636.67	7481.77	6776.55	4937.02	6549.69	7409.49	7173.17	3099.26	7320.75	7033.8	7710.76	4719.75	7602.27	8226.72	4509.53	4027.07	4024.39	4753.05	6300.17
M169T74	Urate	84.9593	1479.01	27310.9	27018.1	19460.4	18717.3	16900	16257	16425.8	16467.1	27499.6	22437.2	20797.4	17546.9	15712.5	17585.5	16964.4	17862.3	20980	21405.2	20314.3	17906.1	16703.5	16235.6	18550	17400.2
M245T81_1	Uridine	84.9593	40.928	43175.8	44718.6	62300.6	63587	53637.4	69154.7	51312.6	80272	62127.8	71465	45030	58871.1	77838.2	58179.3	62391.8	48938.4	55707.8	50260.8	52782.7	55918.9	55962.9	94277.6	81211.7	63715.9
M591T523	Urobilin;D-Urobilinogen	97.0279	47.6915	1247.66	1316.36	1225.78	2292.74	1316.26	2156.01	2388.04	1225.13	1542.07	1944.33	1903.75	2229.9	2965.09	1846	3545.89	1663.69	1746.72	1755.04	2944.59	3487.73	2684.45	2462.77	1464.62	1841.71
M591T544	Urobilin;D-Urobilinogen	591.388	945.096	2593.22	2525.27	1017.72	2242.66	2059.42	2140.77	1763.01	3050.69	2509.12	2294.14	2441.02	3042.83	1396.19	2579.47	1847.08	2232.34	1348.43	1375.66	1333.71	3259.91	1819.55	2314.76	2923.65	1832.65
M140T69	Urocanate	147.044	83.116	767.779	1178.77	1806.77	1139.93	1537.45	1412.26	924.764	1789.18	1444.52	1220.28	1535.51	1122.7	7437.28	1405.2	1797.42	2977.83	1314.29	1009.74	984.346	757.437	173.467	3637.29	1638.64	1852.54
M139T69	Urocanate	84.9943	1479.07	4570.98	4413.27	4403.65	5127.81	4569.78	5389.47	4839.87	4604.9	4720.81	4692.44	4642.89	5134.14	4757.64	4603.71	4362.07	4921.82	4310.48	4732.97	4691.06	4512.67	4635.74	5063.65	4749.58	4701.33
M333T366	Veratraldehyde	333.182	894.895	1359.39	2627.24	2888.26	3639.59	3101.37	7257.67	6072.08	2411.06	2580.14	3555.16	3893.3	5889.1	2803.25	2229.97	6287.7	1692.59	5117.12	4869.36	6143.64	7764.04	10311.2	3232.48	5501.97	9796.68
M184T372	Veratraldehyde;Phenyllactate;3-(2-Hydroxyphenyl)propanoate	187.108	48.2	7922.8	11574.8	11804.2	10609.2	10774.9	10067.8	12821.8	13855.4	10691	9968.29	10285.1	11860.2	17055.7	13661.6	11634.5	16286.5	7670.84	11298.6	11133.3	8906.14	12679.1	13328.9	12954	9137.16
M153T82	Xanthine	85.028	46.795	1466.03	2310.62	3365.59	2508.73	2686.13	2353.9	2463.83	1474.65	3758.46	1664.97	2607.16	1955.55	5148.1	2272.55	4122.99	1574.5	9001.73	1579.5	2180.35	3304.84	3738.45	2154.51	3070.4	4159.08
M285T104	Xanthosine	97.1007	565.057	2806.41	2948.93	3369	2838.4	3279.66	3408.43	3348.04	3469.18	2980.64	3276.65	4238.71	3346	3184.48	3277.78	3617.04	3526.71	3299.83	3168.44	3932.07	3638.3	4281.08	3492.13	3391.45	3585.08
M206T281	Xanthurenic acid	85.0392	1472.21	18157.4	21375.4	15270.4	3661.71	3595.93	14734.2	11498.8	3716.67	3540.26	4013.76	14594.3	11435.9	14785	4210.68	13664.4	3356.97	3641.09	16854.1	3814.55	3514.49	3953.79	3727.28	3927.65	11244.7
M206T251	Xanthurenic acid	97.1008	882.156	853.745	1234.01	1726.36	1306.96	1629.42	1406.22	2232.58	1476.95	996.373	1317.65	1426.48	1472.84	1495.18	1399.99	1971.04	1052.07	2192.36	1738.71	1644.35	1373.43	2365.55	1891.42	1576.56	2015.82
M202T163	Zeatin;cis-Zeatin	85.9289	1479.07	800.688	906.464	1363.09	1256.2	1326.89	1433.35	6983.42	656.182	1469.98	1356.7	1136.18	1397.99	1271.71	1029.7	1144.61	6460.89	1171.52	1491.1	1232.27	7202.85	860.519	1283.73	1440.67	1014.56

## Sheet: Merge (negative and positive)
ID	Vehicle1	Vehicle2	Vehicle3	Vehicle4	Vehicle5	Vehicle6	Vehicle7	Vehicle8	CCl4 1	CCl4 2	CCl4 3	CCl4 4	CCl4 5	CCl4 6	CCl4 7	CCl4 8	SH1	SH2	SH3	SH4	SH5	SH6	SH7	SH8
(15Z)-Tetracosenoic acid	469.253	488.714	305.624	321.082	411.065	1059.27	257.446	1471.07	795.26	577.507	554.51	798.614	494.273	743.821	731.052	420.03	612.155	560.442	978.744	645.293	362.666	504.059	818.993	358.647
(2R,3R)-3-Methylornithine	110.618	759.145	1073.85	1060.65	852.261	699.243	1365.95	1261.81	813.539	523.877	715.232	822.521	984.513	1123.75	696.02	1105.83	738.486	1235.96	983.612	962.865	1300.73	1361.36	1252.72	1027.06
(3E)-4-(2-Carboxyphenyl)-2-oxobut-3-enoate	2474.11	14376.9	9322.87	18073.4	15049.5	14303.2	14579.9	6483.6	7684.88	14374.4	16891.9	15071.5	13111	8942.57	18412.1	4356.45	15876	11815.4	17535	17780.5	22569.4	15349.9	16390.5	14887.1
(3S)-2-Oxo-3-phenylbutanoate	4053.49	3769.3	3907.07	3053.11	5835.24	3499.98	12212.3	4533.27	2342.18	4173.67	5860.72	5817.49	2870.21	2445.23	5943.47	2041.9	9882.67	2162.56	5273.61	6393.13	3662.54	1843.55	7031.71	2242.4
(5Z,8Z,11Z,14Z,17Z)-Icosapentaenoic acid	3324.72	2262.29	3512.14	4621.94	4394.09	3971.5	3597.63	3500.74	3162.9	3453.76	4396.92	4227.77	3399.08	3820.9	4767.67	4509.81	4253.7	4879.42	4601.97	3735.5	4587.74	3582.34	7050.98	4501.1
(6Z,9Z,12Z)-Octadecatrienoic acid	15626.8	39422.6	63148.6	38662.9	45271	49208.6	73397	36155.1	16423.8	32347.4	59598.4	42478	43101.3	38076.3	86469.3	36946.9	47304.5	39386.4	60531.1	50872.2	58789.9	51322.7	75880.3	66923.3
(7S,8S)-DiHODE	9929.64	17682	19643.5	20548.7	20607.8	23355.1	30776.3	12881.7	11256.6	16257.3	27589.4	29110.3	17026.7	18088	33902	18737.4	36398.2	35065.6	30296	37500	59508.7	17354.7	31249.9	56484.1
(8E,10R,12Z)-10-Hydroperoxy-8,12-octadecadienoate	5087.21	5012.62	6632.3	6531.48	7531.9	7342.62	5988.25	5659.32	5138.42	6748.27	6484.46	6522.59	7616.27	6239.51	6947.81	6943.61	5925.9	4756.77	7046.97	7540.34	7606.69	5495.85	6859.15	6934.05
(8E,10S)-10-Hydroperoxyoctadeca-8-enoate	496.403	909.238	1235.47	950.084	627.273	551.68	778.62	1226.7	749.547	319.27	468.101	909.296	1416.31	1260.39	576.241	717.759	600.896	954.263	1108.45	837.02	498.12	1537.77	1378.35	1144.46
(8Z,11Z,14Z)-Icosatrienoic acid	23986.8	42668.6	36277.2	50337.8	33267.4	61703.4	26504.3	59089.7	106500	97113.4	84967	46538.1	69078.5	70774.2	38516.8	72279.2	101531	61484.4	41970.9	40229.3	28627.4	79632.8	36798.2	24878.4
(9Z)-Hexadecenoic acid	19804.3	61782.5	75459.3	64257.9	53525.5	56798.2	61688.1	159252	79447.3	72377	65622.8	73162.6	52018.5	93087.1	55426.6	58121.9	54897.5	87699.6	133502	141597	56033.7	62852.9	61415.8	62550.4
(9Z)-Octadecenoic acid	5133.13	6812.74	11034	10729.2	9464.72	9340.66	8228.89	9314.45	8865.28	8114.31	9365.2	9954.93	9054.26	12382.1	11937.3	12511.5	10510.3	9407.47	10723.3	9594.37	12229.9	10162.3	10630.5	11723.7
(9Z,11E)-(13S)-13-Hydroperoxyoctadeca-9,11-dienoic acid	2925.23	4603.1	5216.86	4015.42	5122.37	5501.74	6677.41	4193.18	3429.48	3723.28	6900.22	7224.62	4849.43	4855.71	8048.05	3741.52	7879.17	7614.19	7004.98	7883.08	13885	4629.38	7101.79	13091.6
(9Z,12Z)-(11S)-11-Hydroperoxyoctadeca-9,12-dienoic acid	999.998	1685.59	2059.27	2026.7	2025.49	1809.38	2684.58	2372.22	19586.2	21919.1	1901.35	1727.82	2956.61	2671.65	2393.43	47063.9	1579.83	3089.41	1893.66	18461.7	2393.25	46955	2942.2	4884.49
(9Z,12Z,15Z)-Octadecatrienoic acid	46150	170217	220860	282743	185573	181406	255023	139373	197376	205638	229367	335272	159020	314292	326803	119018	302189	273126	316630	301474	417498	200139	253115	316964
(E)-4-Hydroxyphenylacetaldehyde oxime	3867.2	4053.06	4400.81	4489.59	2838.14	3011.2	3360.58	3307.48	8898.21	10059.9	6174.28	6022.11	2451.81	2042.78	2795.59	2299.97	3185.65	1834.19	3806.84	5407.16	20004.2	20625	53171.8	40494.4
(R)-10-Hydroxystearate	12567.8	17313.7	18715.7	22520.1	25602.2	26756.8	35844.8	18717.2	12247.1	21528.2	30837.6	39058.2	21273.9	95400.3	43210.3	13252.9	37277.1	33483.8	42921.7	43214.8	80959	19439.4	44705.7	62924.6
(R)-2-Ethylmalate	61414.6	70211.7	68507.3	78647.1	66136.1	52823.8	57908.3	57553.5	61969.1	61463.7	48359.9	72842.5	61593.8	61962.9	92996.8	61497.6	39737.9	51774.9	63630.2	65831.6	58232.5	57939.9	64136.6	49217.6
(R)-2-Hydroxyglutarate	6149.82	13435.8	24311.8	22572.3	14591.1	13816.4	15047.4	21032.6	13896.6	12207.1	24651.4	21230.8	21035.4	14465	14854	21086.6	14569.9	12455.4	25201.6	10326.1	28667.7	13327.8	19119.2	28135.9
(R)-Pantoate	5583.53	9116.42	16208.7	17901.8	16583.9	17352.1	15093.3	14172.9	23490.6	22749.7	3947.19	21857.4	22335.4	27085.4	29550.9	17462.1	8677.66	16118.5	29647.7	25839.2	4291.07	16334.2	32319.4	57937.3
(S)-2-Hydroxyglutarate	6915.41	6822.1	9554.86	5296.5	3633.02	4401.86	6024.13	7471.29	11332.3	6370.35	2683.51	7951.04	34560.4	24819	7397.94	54324.9	5823.84	8991.8	5402.67	5075.07	7441.45	13291.3	7298.14	92360.1
(S)-Malate	5400.55	6282.51	7707.28	4035.66	5290.86	4913.39	7541.08	9573.37	3296.12	9435.3	8581.08	4750.42	8975.54	3790.75	8153.26	6533.73	7131.12	7509.17	4105.01	7497.31	8455.43	8360.28	8617.86	28983.1
(S)-N-Methylcoclaurine	16993.2	14840.7	10836.3	8005.32	14263.4	8505.84	18853.4	43575.7	22249.9	42934.5	19592.2	12236.4	13927.5	10047.8	3923.85	38708.7	15616.8	13145.8	4269.21	6646.04	7209.51	27927	15789.8	8583.4
(S)-Norcoclaurine	26554.1	9306.23	7448	5827.93	10287.6	8837.87	14910.5	25691	16720.9	21493.6	20113	14625.4	10507.9	7070.49	4189.91	25154.2	16352.9	16024.9	6633.98	8463.32	3889.5	28612.4	18787	10409.6
1-(3,4-Dimethoxyphenyl)-2-(2-methoxyphenoxy)propane-1,3-diol	6421.86	10847.8	17657.5	13611	29080.6	18217	23552.7	7899.84	9979.31	15561	16710.1	22138.5	11638.8	12091.1	23747	23562.2	22336.6	19842.9	23641.6	28532.3	39765.3	39001.8	41978.8	38817.2
1,2,3-Trihydroxybenzene	13130.7	19443.7	18253.7	10947.3	21211.6	33724.2	14399.5	64673.1	19952.2	36004.3	13298.8	12489.2	4844.33	11435.7	10611.6	3838.63	12151.8	6256.72	5259.27	8128.28	4103.52	10669.5	12002.7	16792
11beta-Hydroxyprogesterone	1171.08	3337.32	4025.81	4742.32	5233.88	3820.65	4243.61	2941.66	1943.44	4123.89	5398.96	6237.01	7597.33	2138.5	5669.41	1884.21	3283.68	2772.96	3353.58	3471.54	3219.48	4251.08	5915.81	5940.17
12(13)-EpOME	628.335	2086.88	897.687	2065.25	2143.89	924.509	1224.36	881.94	1027.93	1822.37	1000.04	2515.74	4866.8	890.099	1362.88	1667.46	962.187	2186.1	780.694	2393.54	1540.51	1607.72	1644.82	4081.49
12-Oxo-9(Z)-dodecenoic acid	256642	181843	204737	102609	52671	87782.4	78889.6	259361	235525	215284	143807	82535.5	53179.3	81160.3	61470.9	44300.1	129541	101007	48562.5	75400.9	30702.5	92176.4	139463	38355.3
15,16-Dihydrobiliverdin	13639.5	26367.8	31100.9	26626.2	20626.1	36402.9	29934.9	31368	28634.4	22213.6	29712	23513.1	125358	47750.1	30731.5	61429.1	35995.2	25376.8	27981.1	18719.5	1359.45	71408.9	33669.4	41250.6
16-Hydroxypalmitate	123908	87970.2	53088.2	74816.3	87039.5	62308.5	89759.5	90888.8	92114.4	60623.7	51890.3	63005.8	40129.9	79695.7	46321.3	49308.4	62605.8	51761.3	58668.2	59965.8	55751.9	47324.9	51006.6	66612.3
16-Oxopalmitate	31974.4	31725.8	34811.2	31371.9	31354.5	37742	32683	41569.7	30102	30211.3	37149.1	31397.6	33354.6	33276.1	34209.2	31857.2	30661.2	30774.8	30977.1	32225.3	44442.2	32639.2	33030.5	34091
18-Hydroxyoleate	2604.46	2413.64	4033.44	2029.84	2379.01	2716.12	3671.79	1879.53	1653.48	2544.01	2220.44	2511.42	4550.35	3868.87	5192.71	3832.07	2840.66	2105.89	1901.31	2163.7	4313.68	3268.22	3348.01	4099.19
18-Oxooleate	637.394	964.414	695.691	865.832	1356	1036.22	1851.44	554.83	697.735	964.77	1774.79	1772.53	946.17	385.237	2640.11	695.863	761.697	675.963	1900.79	2094.48	1298.06	563.388	1462.12	2346.31
1-Hydroxy-2-naphthaldehyde	21230.7	24111.3	30843.3	38052.8	17237.9	22705.8	18508.3	17702.3	25464.7	24941.1	26158.9	34621.4	27413.2	22428.2	18864.4	24711.4	31045.1	35900.5	25745.7	20136.9	20246	21697.8	14015	14821.2
1-Methoxy-2-hydroxyanthracene	11737.1	15247.9	9402.42	8236.09	3742.41	4770.07	9183.83	11008.4	10936.7	5537.75	3714.69	10060.2	2443.62	10365.2	5936.23	7256.63	5228.16	5109.02	10163.9	5576.42	7540.15	2927.13	6285.04	5725.45
2,3-Bis(4-hydroxyphenyl)-1,2-propanediol	9657.78	21071.5	19910.2	22049	49116.7	53731.5	26378	25291.1	18970	22815.5	26679.6	25095.7	31185.2	24535.3	28215.1	20400.1	27683.3	26747.2	29444	25709.1	18688.5	23162.1	24204	21138.8
2,3-Diaminopropanoate	153815	28472.2	23080	32925.7	141411	143040	136519	807609	890007	215256	395150	130299	898990	148336	104413	300956	208136	135878	77640.1	252965	126591	336373	219565	58209.4
2,4,6-Trihydroxytoluene	256088	221184	180030	149665	87138.3	150623	161704	211977	168706	171918	135437	188668	131938	185049	123366	222893	203986	212573	161128	135828	145221	150655	106920	112833
2,4-Dihydroxyhept-2-enedioate	21216.3	4873.31	29060.2	572.6	21735.3	12479.5	42537.2	32730	27518.8	21654.3	12252.2	35617.2	32960.1	35619.3	38394.2	23790.4	31243.1	39549.8	39878.4	34710.1	55601.6	33648.6	30982.1	29955.4
2,6-Dihydroxyphenylacetate	18632.4	20895.6	22511.8	1406.72	17901.8	18617.6	774.815	25164.3	23436.7	19895.5	2082.82	1878.71	1554.68	24287.9	4412.38	17338.3	951.772	17392.8	2608.04	2436.95	2699.36	762.214	3827.08	1789.46
2-Acetolactate	517.369	834.651	821.207	1112.79	1278.19	1335.69	1002.52	1420.14	613.819	966.568	1960	849.994	1320.43	1174.86	2129.46	795.326	766.717	541.137	1244.45	1933	1028.56	865.658	853.299	1160.81
2-Carboxy-2,3-dihydro-5,6-dihydroxyindole	5570.38	28153.4	25798.3	40396.7	39870.1	23296.5	25243.5	21023.6	25681.4	27872.1	21195.4	33592.5	25052.1	28111.4	23533.7	19254.1	17030	40927	33116.7	27856.6	59607.6	24723.9	26553.3	28773
2-Dehydro-3-deoxy-D-gluconate	42932.8	56915.2	66352.3	123914	65294	54063.3	67845.8	47047.2	73560.8	95347.4	72170.2	126775	156222	100599	219717	68009.7	51167.9	54089.3	164876	174100	235516	98247	135126	247371
2-Dehydro-3-deoxy-L-arabinonate	37147.7	35178.1	36507.7	38170.5	35329.3	31416.4	37378.6	28028.3	31034.4	40098.7	39550.7	51500.6	50517	31653.1	63819	44406.8	27776.2	31814.1	75975.3	82319.7	56248.3	39019.4	47271.5	118822
2-Dehydro-3-deoxy-L-fuconate	98513.3	91879.2	86920.9	91914.3	103869	66859.4	83321.7	75840.1	81806.3	76623.3	91157.2	97925.8	84873	75880.4	111519	75315	61384.6	77925.9	89053.5	93582.9	98388.6	71552.2	77167	49305.1
2-Dehydro-3-deoxy-L-rhamnonate	22736.4	27854	25741.9	32444.6	25266.3	21175.8	28188.5	27179.5	25423.4	27089.6	26782.8	34012.4	27979	27248.6	30010.4	26055.2	22667.5	24656.5	30342.2	28753.9	33459.8	22966.9	25004.5	19561.1
2-Descarboxy-cyclo-dopa	356.259	1199.27	1534.63	317.63	413.563	905.14	610.975	1038.75	1269.71	451.56	763.281	327.174	5810.01	1775.2	948.099	5701.25	891.302	1422.89	4296.9	1513.81	915.468	1792.08	949.191	3286.07
2-Fluorocyclohexadiene-cis,cis-1,2-diol-1-carboxylate	4857.32	3537.7	4698.31	5675.18	6687.94	7121.64	9306.81	8162.86	2931.61	2451.55	6641.87	8853.33	9435.76	8430.27	13161	7373.26	6310.57	5831.95	7042.36	7453.83	8544.34	6712.82	7408.62	6873.68
2-Formaminobenzoylacetate	2.66417e+06	4.55242e+06	4.63897e+06	5.02158e+06	4.88362e+06	4.36909e+06	4.55664e+06	4.87303e+06	4.66872e+06	4.70584e+06	5.00131e+06	4.60032e+06	4.63645e+06	4.51969e+06	4.86281e+06	4.54945e+06	4.36582e+06	4.34381e+06	4.63811e+06	4.84619e+06	4.96755e+06	4.50816e+06	4.60143e+06	4.20176e+06
2-Hydroxy-2H-benzo[h]chromene-2-carboxylate	48952.7	43985	51956.4	28233.7	16424.9	30978.7	31063.5	38488.8	38323.9	32562	24534.1	41928.1	28984.5	34163.6	26422.8	42030.5	41506.7	43151.6	31327.3	27791.9	29658.1	27907.2	20643.2	20603.8
2-Hydroxy-3-methylbenzalpyruvate	88655	287511	284270	231665	275968	426396	272184	269292	164205	158947	202661	206581	260349	200812	157047	316324	194359	236436	212543	200393	213631	251014	164519	160489
2-Hydroxy-3-oxoadipate	21790.9	22827.9	25694.4	26064.3	26213.4	24611.8	31061.9	20465	19238.4	24301.5	32801.2	46037.2	36529.8	21926.7	44099.2	19083.3	21632	21999.6	30917	35052	31473.8	28848.5	29814.2	72120.6
2-Hydroxy-4-(2-oxo-1,3-dihydro-2H-inden-1-ylidene)but-2-enoic acid	4145.94	1673.76	2040.36	4353.99	1882.5	1858.67	1887.63	4342.17	1623.17	4214.68	2848.54	2105.87	1764.44	2514.88	3801.3	2318.14	2475.28	2297.81	2911.75	2392.22	2643.7	2767.57	4569.12	3995.6
2-Hydroxy-6-oxoocta-2,4,7-trienoate	1786.68	2815.89	4370.95	2992.72	3724.43	4480.08	3287.17	3044.69	3055.54	4023.97	2555.72	3321.71	3378.87	4980.76	3513.8	3324.59	3655.97	4875.75	4625.77	4538.93	4862.7	4331.04	4188.73	3647.79
2-Hydroxy-8-methylchromene-2-carboxylate	1003.29	3033.08	2293.05	2351.73	3474	2883.04	3419.77	2878.62	2278.4	2236.94	2189.82	2256.73	2594.98	3084.18	2802.43	2265.53	4022.37	5423.82	4349.33	2399.69	3439.01	4414.55	2890.35	2493.06
2-Hydroxycyclohexan-1-one	100427	142695	162936	181241	195862	162025	198012	136292	161832	144380	140524	208156	187867	209600	195961	167113	154282	246365	233106	214914	243056	190715	197835	199832
2-Hydroxyphenylacetate	21200	23053.5	20060	25427	24762.5	14955.5	27370.9	19908.6	18230.2	21753.5	20283.9	40425.9	14720.6	13416.9	18925.1	6085.05	15774.6	22158.6	24675	23061.2	34621.7	19538.8	18563.9	22677.8
2-Keto-D-gluconic acid	4358.95	18942.3	4862.06	8751.92	3456.57	11099.9	11305.3	14507.7	20388.7	11970	5576.97	20457	21639.2	6419.57	8843.5	17709.6	5922.16	13538.6	11235.6	7332.45	18776.2	13573	17105.5	11920.7
2-Naphthoic acid	17414.8	12529.7	10196	8440.55	11995.8	17751.9	19512.9	11614.3	13473.9	18543.8	10954.3	15542.1	10365.2	13982.5	16915.1	16910.1	8946.26	12846.6	14098.1	21652.7	18711.7	15645.8	11865.5	14090.5
2-Phenylacetamide	1793.61	1853.19	2752.8	3000.66	3661.11	4069.01	2580.37	2945.59	2721.74	2906.2	2518.28	4977.17	2962.3	2824.01	7811.94	2603.36	3383.84	2487.06	3774.83	3261.87	3462.64	3875.82	5808.68	29333.4
3-(2,3-Dihydroxyphenyl)propanoate	11281.3	4700.74	7561.98	19144.1	15398.6	21419.8	20415.3	5905.9	4607.26	18964.1	18164.7	17965.5	35462	9951.22	56645.3	9218.25	22007	13978.3	29126.9	42374.4	29060	28024.2	35567.6	51648.1
3-(2-Hydroxyphenyl)propanoate	185706	165477	110158	718385	539981	484232	536664	183112	159250	432841	740411	448042	393236	304500	906914	148353	474106	300080	873017	692729	1.547e+06	404554	683147	632445
3-(3-Hydroxyphenyl)propanoic acid	39997.9	246022	874537	1.46348e+06	1.28331e+06	1.27036e+06	1.27942e+06	511247	655919	1.13803e+06	1.43183e+06	1.20275e+06	1.15227e+06	879874	1.62833e+06	411043	1.20764e+06	1.18176e+06	1.62226e+06	1.4856e+06	2.07052e+06	1.18497e+06	1.37124e+06	1.36907e+06
3-(4-Hydroxyphenyl)lactate	1187.1	510.454	1358.66	1121.94	1238.66	1543.16	1099.5	542.226	1370	1298.2	1470.08	1358.17	1527.13	1496.24	1040.61	1315.49	1117.61	1015.25	1123.84	1361.61	870.486	992.166	1418.27	1527.71
3,4-Dihydroxybenzoate	6275.26	7568.7	9253.41	8768.11	14137.8	13793.7	10214.9	16648.5	7526.9	13616.3	19802.9	11593	12370.3	9052.54	22115.4	7010.25	9696.22	9963.51	12584.5	19388.6	10692.5	9683.26	13863.2	21087.9
3,4-Dihydroxyfluorene	16594	11234.9	20820.2	23863.5	16412.2	22469.1	15373.9	19621	16417.7	27757.4	19853.8	23607.6	18294.9	10512	16660.3	14201.6	19338.3	10087.3	1502.34	17420.1	14503.2	25307	25337.4	23765.8
3,4-Dihydroxy-L-phenylalanine	21431.7	21498	22881.4	42283.7	14903.2	21314.1	11347.6	35422.8	28442.1	32477.8	24477	12519.4	20492.3	17222.2	17535.3	7379.72	43638.7	22044.9	8944.36	9183.3	15059.5	35021	14776.6	21089.2
3alpha,12alpha-Dihydroxy-5beta-chol-6-enoate	136177	236898	227173	435453	124020	132435	107647	623001	238141	366351	281849	178551	280262	143855	84471.7	38966.1	348284	246180	35178.7	28742.8	91091.9	531753	212574	119939
3alpha,7alpha,12beta-Trihydroxy-5beta-cholanate	846.112	1865.64	2387.87	1676.78	1233.56	2617.41	1912.12	2213.04	1742.48	1633.42	1968.93	1521.56	9382.07	3168.95	2050.32	4419.72	2267.16	1731.79	1854.78	1358.01	1634.85	5362.72	2456.21	2970.26
3alpha,7alpha-Dihydroxy-12-oxo-5beta-cholanate	260839	456935	406250	501069	498441	507002	589915	998307	489768	461134	392349	317985	716572	648396	276314	555812	521293	635967	231387	234471	355168	623619	512315	227914
3-Chloro-D-alanine	5267.82	2337.17	13675.5	12147.9	2743.59	44800.2	12647.1	8630.14	7545.02	12981.7	15463.2	24270	7245.38	3819.74	166622	6729.66	34400.5	9781.55	12376.9	10452.5	14785.1	13880.8	91226	823440
3-Dehydro-L-threonate	11230.3	17054.3	13913.1	28988.5	23943.2	24244.4	37701.5	14677.8	18152.8	26096.1	28779.4	33637.6	57899	27001.1	91969.1	25835.4	41140.1	20369.1	54843.3	69422.8	45244.9	38358.8	47605.5	225129
3-Ethylmalate	18598.8	28001	45237.7	19478	32318.6	24695	34854.9	27491.9	33688.2	23184.4	7945.21	38371.3	41138.7	41829.1	40769.4	40012.5	22894.5	15801.7	36837.2	17331.9	27000.6	40058.1	30883.9	180795
3-Hydroxy-2-methylpyridine-5-carboxylate	1293.71	1605.12	1892.14	1573.74	1883.09	2609.54	1089.75	1660.23	4219.68	2045.7	1264.64	1803.88	5181.79	2033.56	3887.23	1866.56	1334.8	3084.82	2342.36	4179.75	5486.92	1391.9	2073.03	3236.42
3-Hydroxyphenylacetate	17570.3	54515.8	75652.6	53721.8	58059.7	64979.7	56843.7	62924.2	57153	31511.5	45786.9	52611.6	79911.7	106279	63091.6	80003.2	44080.1	71951.7	54203	48596.3	101045	89471	62200.4	58935.1
3-Indoleacetonitrile	11657	22063	24639.7	24500.3	35129.8	31523	25991.7	30964.9	19393.9	17032.7	25404.6	29166.6	40711.9	28739	27142.6	25723.3	19453.4	25468.9	27848	24449.8	27363.9	30823.3	25985.2	32187.1
3-Methyldioxyindole	2980.26	7234.22	6985.82	6218.43	8161.47	7492.19	8974.17	6180.96	6972.46	7153.85	7571.34	8086.1	7283.32	6227.1	6529.51	7281.88	6748.35	9034.82	7625.19	8383.41	8765.31	7703.93	8743.04	6973.78
3-Oxo-5beta-cholanate	1617.97	4217.01	5871.65	11195.5	10525	7303.01	4828.64	6839.49	5684.26	2782.04	2459.78	4987.13	6780.55	16801	7533.17	654.261	3824.73	9527.56	7711.81	3536.33	24988.7	4460.42	13153	7777.57
3-Propylmalate	5062.48	8858.93	9433.75	10185.9	9853	8292.68	9946.61	12445.3	8512.97	39353.8	9440.33	11479.4	14637.5	12578.1	12653.8	11517	7087.72	9831.09	9523.68	8335.21	9769.61	10210	9796.86	17255.3
4-(2-Amino-3-hydroxyphenyl)-2,4-dioxobutanoate	1624.64	2261.98	2323.53	2463.27	2561.38	1988.63	2423.67	2719.45	1974.92	1891.44	1719.45	2576.16	1841.6	2780.29	2702.46	1740.63	1832.03	2192.74	2070.85	1572.2	4852	1758.4	2575.17	1907.89
4-(2-Aminophenyl)-2,4-dioxobutanoate	22131.5	53126.1	56293.3	62489.5	62346.1	57552.6	52123.1	58574.7	59926.9	58390.4	60125.4	62068	54088.1	55668.2	55880.8	50176.9	56623.1	50748.1	57677.3	61522.3	57162.7	54942.4	54396.5	50503.5
4-(beta-Acetylaminoethyl)imidazole	829.004	604.194	1208.6	787.988	1248.01	1392.84	1607.02	1563.23	652.583	1166.34	1332.57	1363.47	599.079	850.371	3657.42	634.897	4631.54	819.161	1326.19	990.51	1490.7	954.473	3016.47	11790
4,4'-Dihydroxy-alpha-methylstilbene	108650	157921	171437	137359	129558	169507	196809	184345	173575	142912	139113	161808	144144	152722	89479.8	163866	156296	166200	148064	124274	156917	172416	151853	103755
4-Acetamidobutanoate	1597.57	3457.75	3405.82	3693.25	3120.34	3397.2	3466.07	5069.13	2983.84	2271.95	1147.51	3259.85	4523.84	5253.01	5362.5	4193.7	2613.23	2713.62	4216.92	4010.73	2071.99	6366.96	5074.82	5966.43
4-Amino-4-deoxychorismate	5962.89	7896.93	8680.55	6851.46	9543.88	9456.97	10405.9	14117.6	9418.09	8119.94	6493.96	9322.05	8933.89	12727.4	10283.5	10452.9	6238.85	10140.6	7603.7	7305.9	7684.86	13202.9	13474.7	9688.7
4-Aminobenzoate	6435.39	7696.84	8149.83	8591.6	9220.95	7500.09	13429.4	9781.94	9306.36	7260.72	7333.74	11380.5	8148.53	10087.1	11173.3	6831.97	8662.59	10019.6	9181.38	8418.44	10520.3	7699.38	8850.7	9027.91
4-Coumarate	1122.94	1423.3	1812.75	2492.23	2148.17	2373.16	1912.8	2510.29	1532.66	1789.94	1610.09	1868.88	1789.24	2548.05	3526.98	2831.75	2302.81	1699.2	1809.4	1705.75	2715.87	2151.45	3014.3	4102.61
4-Cresol	13007.9	36949.3	45827.4	49066	33885.4	39967	32994.5	35902.4	38539.7	21868	28669.2	32574.1	45270.7	58805.4	36524.2	46178.1	28523.6	43830.3	33232.2	29747.8	55069	49074.9	37045.4	32642.1
4-Hydroxy-2-oxoglutarate	15227.3	16178.1	13532.6	25532.8	16281.6	11592.5	20853	20098.5	18089.8	13245	22443.5	28611.9	21441.8	17785.2	11609.8	9792.51	16532.3	15834.8	11370.2	14139.5	18089.9	20503.4	17759.2	14728.4
4-Hydroxy-2-oxo-heptanedioate	18112	20165	19660.8	19218.6	17372.6	16006.7	18378.4	18869.6	19821.1	21608.6	14611	24065.6	19717.6	21082.6	17938.8	18348.2	17644.2	19530.1	17606.8	17065	20054.1	19593.5	17991.9	31687.3
4-Hydroxy-2-oxohexanoic acid	1735.55	2107.21	1789.5	1972.59	2198.67	2148.67	2203.22	1714.2	2612.01	2283.31	1127.21	2881.71	1913.93	2955.57	2432.09	2692.49	2070.5	1621.1	2001.37	1827.92	1145.22	2381.89	1930.78	2724.85
4-Hydroxy-2-quinolinecarboxylic acid	126167	157362	167678	181890	172394	169624	215378	196628	172198	158034	133274	221988	185925	215500	175168	196480	143879	206860	195235	174886	185295	169869	159129	141177
4-Hydroxy-2-quinolone	4189.89	17330.5	21362.7	31466	26956.6	19274.3	14702.1	18883.9	16437.5	10173	11301.2	16954.2	19208.7	27162.6	19614.3	11389.4	10277	13791.6	17635.1	15961.2	28402.7	16745.1	22557.1	21958.7
4-Hydroxy-3-methoxy-benzaldehyde	2968.71	4190.75	2964.62	1845.27	3611.39	2587.51	1669.52	3529.93	4452.61	2003.55	1408.87	1723.25	1531.12	3820.53	1776.92	2618.53	2634.93	2328.88	2613.02	3857.02	1066.76	2059.33	2781.26	1476.42
4-Hydroxybenzaldehyde	2014.55	1747.53	2030.46	3339.14	2281.88	2264.75	2431.23	2306.83	1941.78	3758.88	2945.66	3606.42	4136.9	3954.56	4176.74	2071.02	2957.17	2577.14	3160.97	2310.58	2917.11	3879.42	4525.6	9354.88
4-Hydroxybenzoate	3303.39	3651.63	5249.27	4063.8	3150.25	3603.4	4309.24	3960.42	3721.59	3440.82	3504.58	4477.84	3750.64	5032.06	3917.04	3212.01	3992.37	3785.26	4918.79	4179.94	5625.86	4017.5	4297.22	5562.23
4-Hydroxyphenylacetaldehyde	7615.35	9448.74	9169.78	9404.86	9950.89	8390.96	11206.4	9815.79	8879.21	8026.88	6877.99	10291.8	9925.19	12720.2	10789.6	11351.7	7091.57	10925.4	10166.1	9015.75	10472.5	10045.1	9030.07	9899.98
4-Hydroxyphenylacetate	29336.3	18974.6	21407.1	21439.2	25285.4	30754.3	28127	35105.8	15196.8	24286.8	14400.6	15121.3	11827.2	22320.5	17039.1	12919.6	12682.9	16475.1	16418.6	16626.7	15258.3	20041.3	13768.3	16228.4
4-Hydroxyphenylethanol	1813.34	2536.03	2922.83	2806.69	3123.78	2882.5	3451.35	5481.44	2496.98	2605.16	2226.2	3238.81	2772.7	4089.3	2675.77	3107.64	2570.58	2753.8	2811.51	2509.88	3460.65	3188.43	4004.62	4531.81
4-Hydroxyphenylglyoxylate	18571.7	19258.1	24353.4	22799.3	20295	19460.8	24735.2	22271.1	23105.5	21993.2	17125.5	27005.1	23041.1	27132.2	22527	22998.7	22863.4	21270.7	22159.6	24114.5	22758.8	28588.3	24215.7	29337.2
4-Hydroxyphthalate	2802.01	2978.82	4002.57	2571.48	3194.03	2413.88	3953.03	4008.04	3166.33	3643.55	2792.97	3727.41	3643.37	3991.07	3210.05	3701.32	2704.88	3563.61	3403.24	3245.23	3483.68	4422.1	3154.82	5333.58
4-Hydroxystyrene	3103.17	8753.05	15779.1	30692.1	27070.9	26211.9	26534.4	11427	11812.1	20484.5	25803.7	24043.2	23905.5	19522.6	29745.2	10271.6	31222.9	22467.3	36143.1	31433.3	41746.4	20587	31652	47250.2
4-Methoxybenzoate	9823.9	11540.8	11710.8	12521.1	11997.1	10619.9	11783.1	15230.3	12027.7	9716.57	14894.5	11697.8	10453.3	15163.6	10052	12018.5	11289.3	13179	12857.1	10201.3	14820.5	14065.9	12331	11068.2
4-Methylaminobutyrate	6621.63	5383.49	6490.72	4104.34	3842.54	4799.31	5479.76	8026.64	6774.09	4182.73	3469.45	5192.66	4447.28	7901.96	4972.25	8937.9	4740.18	6723.23	6114.74	4093.65	5967.5	7475.2	9139.34	5377.82
4-Methylcatechol	2080.83	2931.57	3811.82	1817.94	1513.53	1687.7	2083.09	4716.37	2365.66	2205.49	2015.24	1703.48	3292.25	1638.1	1083.1	3344.49	2457.32	1257.37	1278.15	1534.35	1350.99	2233.16	3243.4	1748.33
4-O-Dimethylallyl-L-tyrosine	2850.46	5408.15	4689.29	5132.31	5615.1	5483.76	5874.92	6128.7	4050.97	4089.42	4399.33	4420.97	5323.82	5874.05	5449.2	6118.55	6244.25	5016.62	4976.98	5583.22	4035.39	6822.08	4592.08	9631.47
4-Pyridoxate	2287.33	2295.23	5096.79	5718.64	3127.72	2093.8	1690.34	3863.45	3899.18	2132.39	2851.97	2488.27	2362.08	18550.4	3549.31	2569.98	3707.69	2961.12	4195.81	4065.46	2273.44	3326.7	5903.36	2457.74
5-Acetamidopentanoate	4664.02	12555.1	13999.1	11342.9	10122.1	13191.1	7900.89	14128.3	10125.4	9020.76	13047.1	8681.68	16841	14416.4	9957.37	5341.48	9726.54	13671.7	7375.11	8340.1	10900.2	18619.1	11646.9	12653.5
5-Aminolevulinate	3718.4	3271.35	16871	4264.86	5758.07	3380.95	4024.77	28043.4	2725.34	1879.8	4066.87	24847.4	5210.09	3872.92	19024.3	7836.12	2637.3	3642.41	5780.35	3603.46	7465.3	43599.3	3873.13	5726.8
5-Dehydro-4-deoxy-D-glucarate	30056.9	37103.2	28072	26193.7	21102.2	22953	16296.7	16654.8	31240.7	37974	36969.3	29628.5	23960.3	20734.6	15993.4	14607.5	28941	30379.5	24291.6	36384	31311.2	17024.5	11239.5	13901.1
5'-Deoxyadenosine	11177.3	17352.6	15047.5	14300.6	9079.56	8699.38	14518	27106.3	13420.8	11332.4	14330.1	9731.74	13677.2	6238.28	5062.64	16149.6	12520.6	9363.62	6896.42	8077.99	636.551	8424.23	10056	15770.5
5-Hydroxy-2,4-dioxopentanoate	10413.9	13497.8	12018.9	8786.1	13863.4	16500.4	14469.7	16744.8	8746.56	18496.2	12851.7	33475.7	32523	15577.1	27758.3	36250.8	12764.5	9885.82	13695	16100.1	29279.5	29433.5	17027	92235.1
5'-Methylthioadenosine	32251.1	15240.2	48970.5	18887.1	23709.8	22361.4	105333	17266	37362.7	26299	71740.4	30392.2	23534.8	15942.6	108461	12145.6	42425	88873.4	37927.9	41039.7	67283.4	23325.6	44408.7	59687.2
5-Oxoproline	312.467	503.945	807.413	1356.88	1240.63	934.58	722.035	1172.65	1074.97	719.156	289.341	837.549	1034.66	2922.76	1315.24	699.258	1191.98	3576.54	1986.54	958.9	4315.71	1545.82	2214.6	2022.04
5S,8R-DiHODE	64126.8	78148.9	68190.8	75063.3	75975	70168.5	77510.6	72937.2	76175.9	87468.5	68387	67332.1	75683.7	71124.2	82260	76116.7	67351	89208.6	74079.2	77888.8	78576.1	73897.8	73515.6	78718.5
6-Acetamido-2-oxohexanoate	191571	395151	325814	421972	374760	463800	543936	978829	360199	369049	311196	270225	562817	524914	231911	400587	355710	588749	187344	163386	298346	507309	415115	175724
6-Oxo-1,4,5,6-tetrahydronicotinate	8797.85	8321.41	7816.77	8726.48	9459.13	8227.87	8572.02	7206	8137.82	9182.79	8948.56	8260.26	8259.08	8146.23	8481.48	8265.62	8318.54	8365.17	8713.65	8044.87	8115.35	8613.64	8552.71	7917.6
7,8-Dihydroneopterin	12218.2	6555.43	10082.8	8944.82	10304.4	10616.2	12677.7	14334.5	11326.7	7510.34	5935.86	12020.2	15046.1	8717.52	11052.6	7221.57	10112.7	11375.2	8789.5	6943.7	5479.71	9485.39	9498.89	10046.5
7,8-Dihydroxanthopterin	91488.2	36710.5	42312.2	32568.9	25469.9	30448.8	43253.3	45229.1	38826	72196.7	36189	57085.5	22910.6	29624.5	33667.6	26739.9	29789.2	30799.1	57323.8	72436.9	30774.2	22762.4	37464.6	25911.9
7-Oxodeoxycholate	10144.5	20770.6	16915.3	17020	22669.2	20828.3	29903.7	12051	10039.4	20782.2	25298.1	37220.8	14051.5	14927.9	35093.8	8224.17	37791.9	32562.8	36450.2	35662.7	71981.4	16569.6	38264.3	63996.1
8(R)-HPODE	15100.9	15553.8	15822.4	15199.4	14078.8	13903.6	16138.6	15527.4	15839.9	13931	13735.9	14864.1	14856.4	15171.1	13411.7	15659.4	14996.1	14791.2	14372.2	15176.3	15437.2	16124.3	14302.7	15195.7
9(10)-EpOME	7375.78	171977	142514	124665	143640	116567	133234	49536.5	115733	129324	123606	124882	124853	75011.8	112313	113623	53884	131076	152461	108749	120756	112910	111081	68240.5
9(S)-HPODE	5902.55	9849.95	11318.4	12808	11901.6	14369.1	14851.9	24129.7	11114.6	11807.4	13529.4	15320.4	11262.6	14416.8	13021.4	25688.7	15017.3	17406.7	13699.8	13082	23252	24337.9	16446.3	15445.7
9,10,18-Trihydroxystearate	254325	597006	881499	518775	611834	624734	910732	584408	260519	490860	772471	575433	568451	499163	979119	510040	679367	527265	788415	648679	715433	681139	878449	810089
9,10-DHOME	8752.09	11342.2	15372.4	13487.7	13606.2	16461.7	14880.4	16521.2	10112.7	11139.6	11128.7	11317.5	12885.6	13634.1	9103.12	13284.5	11554	12475.9	13368.1	12227.1	13826.4	14557.3	13835.7	11005.3
9,10-Dihydroxystearate	10518.8	40676.1	26198.2	14726.8	22327.5	11451.8	40641.6	73082	22769.2	16013.1	21140.2	19309.7	41723.2	9474.13	22410.3	47920.8	16788.3	36663.8	9350.33	22724.6	20597.4	39680.8	33875.7	15974
9,10-Epoxy-18-hydroxystearate	5201.9	4000.91	3253.75	1769.3	1816.1	3060.67	4454.68	2464.79	5313.37	3754.25	2220.58	1659.29	2579.72	2520.55	4074.66	3970.68	2563.5	3558.32	2524.72	1751.14	2598.64	2937	2501.15	2056.22
9-cis,11-trans-Octadecadienoate	10229.9	7517.92	6589.58	7157.38	11910.3	6718.87	21996.5	10431.9	5388.24	14115.4	14536.9	10779.4	14239.1	6814.44	13399.2	13222.3	7454.35	8834.6	12858.1	14085.1	11715.2	9455.57	13337	39103.1
Acetanilide	112.081	1125.53	1354.1	2990.54	2676.7	1730.65	1141.56	1641.2	1589.09	707.889	647.874	1221.56	1734.62	4389.59	1807.61	276.577	915.151	3021.88	2001.52	656.871	6252.58	1102.03	2712.32	1516.95
Adenosine	59938.6	78827.8	121736	148007	68168.2	96719	101125	133507	65064.8	48979	20162.3	96494.2	98435.1	188998	166017	78672.5	52684.2	106719	98575.9	103669	152587	79416	73781.5	72287.5
Adipate	7175.92	15438.1	16365.3	13381	13848.8	10157.3	12161.4	17835	12165.7	9814.99	10126.6	15615.9	28354.7	30079.3	18265.8	23292.7	9051.28	11379.9	12044.9	10818.2	14163.8	14499	13273	33159.4
Alanopine	3308.19	7303.21	7417.6	9771.75	8700.84	10095.1	10360.9	10720.5	7998.32	7730.6	6971.64	9009.62	10561	8760.29	9468.17	10423.3	8143.18	8727.55	8485.87	9591.37	10438.2	12557	12246.2	10753.6
alpha,beta-Didehydrotryptophan	5754.93	7587.64	8035.76	10696.9	8154.49	5441.99	7725.37	7073.33	8439.32	6208.19	6814.78	9322.73	9409.93	13940.5	11080.4	7284.76	8749.82	10859.5	12135.9	9797.11	13417.6	10639	9930.32	12890.1
alpha-Isopropylmalate	4290.27	13688.7	23804.4	29578.6	16313.1	13763.5	30232.9	23146.9	12980.6	25488.3	20271.7	24971.6	27208.4	26066.1	56294.4	22909.3	20677.2	19133.6	20573	29632.9	67191.5	19290.3	58587.2	135520
Aminoacetone	21338.6	18156.4	27826	50592.4	54287.9	55472.9	38533.4	33263	25243.6	30383.6	34504.8	43868	29044.4	45018.9	36047.6	18170	33012.9	59511.7	60267.1	45401.9	51362.2	34586.7	46006.6	56072.2
Anisole	2981.51	4001.74	4930.94	5578.09	3508.23	3767.16	5199.56	21177.6	1441.8	17863.1	12613.8	3691.94	6123.59	4455.64	4947.36	4001.22	11456.9	4697.3	4417	5235.87	5874.19	5628.61	5828.59	4887.6
Anthranilate	14145.9	9978.76	13419.4	9768.46	10403.5	9786.88	11600.5	8437.26	7291.45	9453.64	12397	15611.4	10484.1	9104.94	17086.6	8680.12	11309.9	13365.7	12538.9	13476.5	15140.4	10788.6	14683.2	43782.6
Arachidonate	165504	481231	472513	493910	538818	742705	415723	472119	676535	880027	847950	548321	853457	495787	537344	475557	854563	513177	441906	519903	479691	661160	413647	370380
Arcaine	11479.1	12861.6	14920.7	13782.9	12292	6117.93	13704.4	14839	13783.1	13669.1	11438.1	15518.8	27540	14870.6	14044.2	31802.1	10389.5	14387	11622.3	10836.4	12570.7	17448.2	14133	8683.66
Benzamide	4169.17	4538.78	4214.3	4510.51	5079.81	5260.26	4999.88	4530.03	4858.9	5958.39	4362.28	5199.72	5200.37	4430.54	4827.45	4846.18	4239.72	5438.38	4749.46	4643.38	4521.49	4788.57	4883.78	4880.86
Benzene-1,2,4-triol	1899.85	3258.89	3418.85	960.458	2991.01	4558.01	2253.31	10305.1	2625.03	5697.72	2105.43	1588.98	563.721	1325.26	1409.41	427.137	1743.84	528.269	562.049	504.862	655.153	1671.44	1620.9	2575.48
Benzyl acetate	19280.2	29606.3	34031.1	47394.6	56038.4	30336.3	30529.4	23075.4	25797	20318.1	21398.7	26321	33237	50804.2	16786.8	29632.3	22436.1	36226.9	21698	15651.9	29052.4	36131	16335.2	25466.7
beta-Alanyl-N(pi)-methyl-L-histidine	15031.4	4522.21	8128.49	10189.3	15096.3	45304.6	19185.9	12028.5	11975.8	57405.7	50285.8	24642	5368.07	989.401	21299.4	2196.68	24155.1	6148.1	30373.1	42432.6	1068.19	1861.56	1417.99	1054.04
Betaine	1145.81	1144.83	1518.91	2166.15	3408.59	7146.24	2971.25	1921.84	1073.4	4743.46	3989.74	2884.49	1659.52	1652.36	5176.1	1067.77	2405.51	491.876	4986.97	8168.22	2610.95	3105.91	5597.85	11516.3
Bilirubin	132186	130467	127456	125302	118937	124900	119278	109679	125967	128630	125680	123956	116850	125415	120250	125751	126411	120639	126558	123568	117607	125253	119933	113449
Biliverdin	3663.15	6273.98	6689.78	3452	3781.95	3329.62	5000.95	9739.67	5555.22	5250.15	4818.71	4936.28	4424.81	4488.89	5173.44	7305.95	3543.72	3116.4	3015.57	4587.15	2997.98	5466.28	10309.9	2796.46
Biotin	172254	131020	178461	205477	118023	174441	84055.7	226641	167914	182058	139436	94822.1	123776	117358	96524.7	107787	139338	102262	66008.7	91275.5	56376.1	165824	90110.8	59746.5
Carnosine	567635	425421	568890	513523	107818	251206	119937	167955	474929	685422	497031	204700	384227	256936	204371	168085	620934	215160	49335.9	61463.5	153868	527495	230008	56216
Chenodeoxycholate	16968.4	55615.7	62618.6	53248.8	64944.7	53814.8	91131.6	56639.6	40621.4	54350.2	59000.7	62869.2	45526.8	55951	80481.8	48630.5	57137.4	65763.7	67625.6	64336.2	73588	73673.2	82961.5	76662.6
Cholesterol sulfate	23276.6	13116.9	10129.1	12860.4	19657.3	20193.6	11213.5	20468.4	23378.1	14724.6	13292.9	10851.9	8988.85	10492.2	9850.07	10298.3	27901.4	15400.5	14803.5	16479.1	9983.1	8121.73	11754.6	11427.6
Cholic acid	11989.9	12688.5	18375.4	19397.9	15275.6	12181.2	26520.1	6303.56	15257.7	11596.2	9904.33	12021.9	6539.56	17099.3	15315.1	9933.06	10775.2	11339.3	10049.7	11655.2	12938.2	10325.5	13400.1	3716.99
cis-4-(1'-Hydroxynaphth-2'-yl)-2-oxobut-3-enoate	94481.8	154711	163443	72885.2	52028.7	107858	85598	336116	124094	202288	91534.1	73799.2	29883.1	53334	61215	20405.5	85762.3	35517	30519.1	46478	22346.4	68312.1	76779.4	36182.7
cis-4-Hydroxy-D-proline	2360.01	2621.58	3300.82	3520.23	2797.87	4693.65	3245.41	3268.47	3562.71	3863.73	2327.73	3390.9	1624	4372.49	2446.68	2226.79	2514.78	3187.11	2441.43	2296.69	2846.98	2572.92	3159.86	2643.34
cis-9,10-Epoxystearic acid	2371.87	1790.88	1771.46	1516.48	1170.58	2147.65	1435.54	3020.03	1864.44	2761.7	1827.9	1723.47	1545.65	1033.03	2237.96	2213.11	2135.27	2199.36	1323.64	2107.5	2395.34	1779.35	2338.64	2130.9
Citramalate	8011.25	17613.9	21185.8	27598.7	15312.7	16628.7	21647.8	19402.5	19539	15633	2664.92	18072.5	76982.1	33326.2	43800.8	148316	13879.4	20387.8	17126.4	17270.4	5189.38	38223.4	38544.5	133207
Citrate	26315.2	85421.7	106649	121946	48616	42194.6	160039	116896	31700.8	47298.3	54811.4	70137.6	48778.3	129009	165352	35902.8	73257.1	47893.1	67418	54629.6	20906.7	53626.3	156814	1.84028e+06
Colneleate	9330.32	8536.05	6120.3	6308.17	7025.93	7095.3	9765.86	9582.75	8741.85	8969.4	5885.05	6603.36	7006.77	8385.68	10176.5	10483.8	5341.86	6456.05	6711.71	6463.79	10326.1	8127.24	11075.3	9937.37
Coproporphyrin III	20711.6	24402.8	28354.4	28501.5	18468.6	19787.6	26716.7	28074	22435.9	16668.9	12518.6	15779.6	9456.03	23098.7	15650	10066.1	15376.2	20307.9	14949.4	13947	16600.1	11031.7	13994.1	22837.1
Crepenynate	1684.87	1431.85	2314.85	1529.39	2577.93	1958.57	4334.11	1728.01	2533.31	2257.46	2825.36	2390.58	2487.2	1862.32	3232.55	1751.18	3252.51	2417.64	3099.36	3119.33	4688.17	2222.01	3712.81	5882.68
Cyclohexanol	13069.2	12898.4	16270.2	14425.4	15010.1	15247.1	15518.4	13338.1	16179.5	14328.9	14387.6	17411.9	18259.6	16862.9	16797.4	15923.8	15359.4	15140.6	18474.8	18057.4	23236.3	15727.5	15483.2	15201.9
Cytidine	17432	20651.5	16298.5	23818.5	19686.8	25780.3	22980.9	25992.8	18434.5	29556.5	32211.1	23015.4	46092.2	21624.3	29588.2	25650.8	30489.4	24298.7	20558.7	21099.1	27187.3	75185.3	42098.2	31091.4
D-Arabinose	299408	446328	440689	408099	358894	342731	343605	272905	424697	121782	143163	508265	220843	382928	246453	213504	238234	417597	299493	315212	103002	321547	258193	147670
D-Aspartate	34073.4	53342.1	51124.2	26214.9	22679.5	32051.3	37038.7	68185.1	23363.9	22708.6	44261.9	26585.7	50517	18931.1	14141.3	47105.3	39142.7	34530.1	14417.9	17798.3	8601.96	43794.9	38523.3	15469.1
Demethylcitalopram	3834.74	5930.37	5961.97	4442.88	3799.84	5910	6297.73	8220.06	6426.46	7126.62	6726.35	4349.34	18509.5	6581.45	8111.33	12296.4	5681.52	3853.32	4101.11	4234.93	4977.26	14751.3	11262.1	8968.49
Deoxyadenosine	40781.9	39831.8	35041.3	39349.1	29514	28612.1	31311.3	39236.5	41681.3	31889	16362.9	48453	18424.7	44560.2	33061.3	39820.3	26954.2	28841.7	36323.9	37811.8	17746.9	4742.38	37244.3	29323.6
Deoxycholic acid	11879.3	4417.01	6483.26	5355.23	6033.89	12023.3	4198.93	9243.88	8213.3	16003.1	8943.51	8118.43	5410.29	3223.44	5626.08	4728.84	10621.7	3645.7	5418.09	8445.56	2192.84	4896.7	1744.81	1741.34
Deoxyguanosine	25491.9	40647.4	51620.4	23281.5	25336	44647.8	44597	40950	24780.9	29783.3	2417.5	1149.57	200380	40970.8	45711.5	66111.6	34154.7	29633.3	20620	25243.6	6033.61	97247.6	24663	51939.6
Deoxyinosine	22094.6	54474.7	58794	20664	30261.7	61789.5	58578.8	30705.5	18060.5	48998.5	5016.57	24084.9	556722	45860.7	45670.2	291695	75535.6	44359	16407.2	20065.9	6237.24	259891	42405.3	131764
D-Glucono-1,5-lactone	1675.07	2121.14	1938.27	688.385	1373.23	1972.03	1728.02	2062.86	1893.8	2328.13	2132.14	2208.39	1593.98	1861.78	3005.95	1642.38	1773.62	2114.91	1740.31	1909.91	3019.56	3935.85	2410.63	11774.9
D-Glucose	8764.08	13628.2	17208.7	15233.9	17069.5	12108.9	17924.1	10633.1	17575.7	11374.4	12569.4	22171.5	13994.4	18558.8	18740.3	13759.3	12208.6	13194.8	15894.8	16156	20574.2	15631.4	10307.6	15438.1
D-Glutamate	6823.61	9540.66	6216.58	5533.03	9361.29	10811.9	11913.6	15759	21364.3	14257.4	2803.27	9512.92	9938.05	9507.55	4971.22	5674.45	16552.7	13162.3	6712.26	5108.69	2553.49	6604.16	8055.43	18094
D-Glyceraldehyde	145847	145346	227739	262877	166471	402464	310530	164026	159410	304664	195753	208096	439317	182530	822237	319412	370472	249226	472963	582073	379775	558947	409848	1.28648e+06
Diethanolamine	4760.41	5690.6	5958.04	6029	6859.91	8549.67	6056.63	8143.66	5624.44	6320.1	6322.95	5214.92	8716.58	7612.45	3039.11	4654.15	4776.14	9536.96	2981.63	5156.26	6431.67	6234.63	4855.49	5725.86
D-Lysopine	2257.91	3368.42	7177.44	7148.51	7904.34	6167.22	4729.7	3923.89	2718.96	2592.54	3876.22	2589.33	5060.73	3490.95	7999.76	4760.62	4168.39	7628.99	5303.54	3626.85	9369.09	6773.34	9461.54	3879.69
D-Mannose	118880	227809	249291	269028	272168	231806	246359	198958	232663	221561	197170	283558	186382	275812	242290	200582	186757	148548	241746	220326	259973	238563	226369	127773
Docosanoic acid	1762.09	1589.79	1274.52	1331.94	1515.82	1854.56	989.055	2400.38	2045.81	1653.59	1414.93	1596.82	953.838	1683.72	1486.28	1094.93	1535.94	1743.71	1813.17	1654.92	1451.06	1245.95	1791.96	1156.57
Dopamine quinone	2614.69	6529.17	9479.61	14419.7	8841.61	7508.39	7042.78	8496.55	9185.2	7472.78	5458.56	7655.56	7264.47	20208.6	6667.19	5114.71	9896.46	24961.6	13860.2	7203.57	24186.5	9929.49	14919.4	7713.24
Dopaquinone	4865.46	27320.4	35010.2	52777.3	34147.4	31110.7	19370.7	28709.8	43892.8	21970.9	22623.6	30684.9	12675.6	57596.8	53697.3	9875.73	33379.1	56973.9	41262.5	32990.4	24066.8	41185.6	33446.9	103847
D-Proline	3773.12	7353.41	9324.78	10035.2	6265.32	6748.47	10839.8	6320.82	5044.32	3466.78	5814.04	5109.72	51947.4	12713.1	14278.4	25243.4	7096.88	6370.76	5145.94	7408.71	3909.11	14802.8	3429.58	12955.2
D-Psicose	12704.5	17082.1	17612.4	18986.5	12846.4	28237.5	10598.2	8469.67	16519.7	6237.72	4866.69	16710.7	31401.5	11228.6	63781.1	23732.6	30016.5	19627.1	32186.6	22029.9	7605.72	39631	23036.9	84673.2
D-Ribonate	9172.7	6665.83	7054.48	6882.15	8189.14	6448.15	9566.49	3265.93	8076.27	3369.08	8840.88	5080.99	19768.1	7732.23	9661.06	4680.32	1434.33	9219.42	6288.39	9802.62	11857.5	6129.9	9962	11020.5
D-Ribose	10628.7	16995.3	19121.6	22245.7	27694.5	24259.6	20602.7	14100.5	14028.3	14738.5	19760.9	20601	60142.7	20832.7	48169.7	49557.2	22765.4	17120.6	46303.3	67881.5	31378.1	41485.9	24414.2	65662.9
D-Urobilin	939.739	838.966	1328.15	1414.25	1718.27	1994.38	1652.03	994.718	974.826	2125.77	2578.47	2839.51	1351.94	1778.31	1362.53	572.928	855.206	1003.53	1148.62	912.35	2945.83	1648.54	1296.11	2345.08
D-Urobilinogen	1824.93	1527.63	2576.41	2626.06	2196.76	2721.49	1712.21	3071.18	2745.19	2436.88	1757.67	2241.74	2792.73	1950.6	2963.88	1534.36	2215.34	1864.52	1716.53	2029.53	2398.59	3651.09	3137.77	3524.4
Erucic acid	500.237	897.689	723.545	589.156	2166.84	1141.58	831.492	2023.25	1120.62	702.966	775.199	1074.08	595.358	1824.13	933.72	735.129	1065.52	1227.23	1348.61	1174.56	581.934	600.016	962.299	671.314
Estradiol-17beta	18477.1	15139.5	14478.7	22487.8	11375.9	32683	12428.3	18994.3	15432.4	24599.7	7977.71	22500.9	9064.56	10671	13617.4	9552.56	11627.5	26449.6	10603.2	11919.5	17633.8	10523.5	19328	26618.8
FMN	16408.3	34052.8	34173.1	41987.2	42900.9	45476.4	40543.3	48128.1	39757	36384	32997	42968.1	42900.6	43407.4	41630.6	45099.1	36464.3	43597.4	47266.9	41739.5	51063.3	52126.2	55211.4	51205
Formylanthranilate	3448.84	4850.02	6359.37	4601.62	2911.31	10712.9	4638.29	7628.02	4285.21	6709.83	10272.3	6346.46	6640.56	6299.32	10839.3	5067.92	6429.74	5198.28	6936.99	6749.68	6093.7	6871.41	8295.37	28494.1
gamma-Amino-gamma-cyanobutanoate	189480	67494.7	94979.2	71671.6	34744.3	41028.3	95316.1	61842.8	81473.8	48173.5	30279.9	52463.6	40967.2	67187.3	42204.6	49906	69380.3	35919	51474.1	74454.5	27310.7	35487.3	46464.2	46675.2
gamma-Glutamyltyramine	1605.43	1521.59	2090.46	1269.64	1403.25	1811.45	1176.49	2376.69	1874.01	2282.89	3369.14	1856.43	1177.25	2093.21	6103.23	2074.18	1939.44	1519.13	1920.12	2271.53	2967.63	1704.34	4262.57	2742.57
Gentisate aldehyde	2968.78	6436.38	8425.38	6490.83	7328.56	7727.26	7101.23	7880.92	6890.5	3781.5	6022.63	6934.41	9517.36	14403.6	8062.12	9863.91	5961.84	8476.84	6925.29	6475.79	11584	9858.65	7329.55	6837.7
Glutarate	20572.6	34236.4	35658	30256.2	22036.8	29157.3	22546.8	35490.1	55132.1	23884	27705.3	38796.4	114469	84718.8	51236	70446.6	18437.2	34349.6	37121.8	33955.3	40376.1	52369.4	31729.6	61076.6
Glycochenodeoxycholate	1831.65	5439.96	8468.06	4424.5	3821.12	5541.95	3740.42	7505.99	6475.82	4069.22	3837.97	3635.7	13754.1	5776.9	7768.46	9759.05	2495.2	2823.98	2323.7	3426.12	6490	13537.9	9164.98	6263.23
Glycodeoxycholate	3739.37	4330	2840.24	1661.49	3079.92	2674.93	1401.39	5147.93	905.422	1371.03	2446.34	1717.86	2407.29	1934.1	2986.14	5499	4728.72	1196.7	2043.6	2138.62	2702.6	2058.24	5332.5	2129.67
Guanosine	5627.83	12979.6	30725.5	10919	13656	18921.2	12683.5	7752.49	7451.66	13337.6	22445.4	9030.9	77705.2	35336.8	27602.7	92726.4	18245.7	14525.4	8360.73	9081.65	26935	13715.9	19716.7	20381.9
Hexadecanoic acid	224849	230615	149324	148285	166417	239908	156829	314157	245858	155557	179859	157637	133083	200757	144084	199378	192633	232587	202058	163760	217049	201545	226151	171302
Hippurate	4087.41	4300.21	7579.44	11630.8	8680.84	13590.5	4841.72	6845.72	13634.7	16855.6	12381.6	12705.1	8687.99	14326.7	8661.23	6013.25	16428.5	13526.7	8052.61	8357.72	7755.35	11596.1	8045.12	6268.59
Histamine	271488	126656	151370	101607	122265	381910	77673.4	227896	253640	583239	228640	170472	81099.2	59233.3	79987.5	85343.8	175198	58197.5	114967	184883	28403.7	166152	11289	2306.44
Homogentisate	4336.58	5295.64	5844.52	13303.7	7407.26	7107.81	9597.37	5624.89	4896.47	12479.6	17479.8	13728.8	9623.42	6256.75	35338.3	5659.37	7807.02	6449.2	17483	19759.5	21022.7	5506.24	32102.8	14086.7
Hypoxanthine	6403.3	7726.73	9149.86	8456.1	10099	7511.52	8867.34	8997.91	6964.51	6467.63	5943.12	8691.6	5676.76	8201.24	11211.4	7102.2	5823.49	6385.98	6034.79	6990.42	12385	8582.68	6801.76	11503.4
Icosadienoic acid	4997.53	3123.34	2646.42	4947.5	3196.6	6250.04	2448.28	5271.45	4100.57	4015.88	3253.53	4301.63	3092.04	2638.23	2786.31	5102.45	7083.06	8955.02	6470	7924.97	6590.53	3331.69	5374.46	4038.92
Icosanoic acid	2147.58	2228.91	1552.95	2196.53	1685.53	2386.37	2033.87	2674.85	1876.65	1812.76	1865.88	1818.61	1643.17	2464.24	1743.97	1957.33	1630.8	2287.8	2162.02	1583.22	1582.84	1209.62	2268.23	1637.2
Icosenoic acid	2683.38	3240.53	2737.97	2189.29	3409.33	3930.27	3523.81	4974.24	5033.15	2304.17	3269.5	3445.84	3305.82	6443.8	3796.54	2855.29	4796.94	5193.78	4965.81	4563.42	3400.36	2792.12	4274.91	3107.18
Iminoarginine	785.45	809.664	671.492	693.595	777.28	1369.35	1107.34	691.248	813.594	1422.68	520.453	793.745	1869.86	994.626	4303.81	1068.04	1498.2	1232.07	2711.56	3258.86	1479.37	4985.92	2182.5	8714.97
Indole	1234.59	1779.88	2541.25	3393.18	2500.12	2704.82	2469.54	2330.48	2270.53	1229.26	1731.6	2212.49	3007.91	1525.69	2871.72	563.292	1352.48	1481.57	1994.7	1788.8	2184.78	2201.89	4334.91	2381.5
Indole-3-acetate	3321.4	4933.34	7267.48	7614.85	2764.47	2099	4188.07	8778.4	3877.41	5362.94	12360.4	6473.79	19561.7	2105.78	4149.77	5192.04	2676.15	9083.14	5697.12	5335.99	2303.39	4184.14	3240.86	3109.85
Indole-3-carboxylate	14524.4	13681	30221.9	15074.4	19552.9	11010.7	18204.1	12991	9986.09	13455.1	15383.8	21045.8	18585.3	26338.6	28349.3	8004.74	11098.1	10927.1	18278.2	21642.2	11992.2	12562.4	17600.2	28613.9
Indole-5,6-quinone	9404.85	16173.8	17391.2	18545.3	19542.2	16360.8	19445.3	17457.4	17643.9	16286.7	16371.8	21845.6	17608	16011.4	16555.2	16210.8	14177.3	14329.8	20749.2	15568.6	16419.5	16378	15415.2	16648.7
Indolelactate	3632.66	4667.62	15497	55074.4	12317.1	20205.5	19063.7	7494.99	12544.5	58968.9	50157.8	74788.3	42921.2	19864.5	96256	7215.04	33938.9	11879.6	32370.2	40856.7	52616.2	103207	94831.6	250990
Indoxyl	4196.44	5138.28	5482.52	7011.28	7416.2	6217.66	7372.14	6435.23	6018.24	6616.92	5709.91	8244.59	10265.9	7280.89	8249.35	6190.42	4779.23	6779.44	6773.8	6036	7868.37	6677.31	8646.88	11692.9
Inosine	23668.6	83376.2	103124	85214.9	101415	90565.1	136561	90977.4	59624	89629	97097.3	103913	75210.2	82606.6	128679	76944.7	90561.1	101229	110347	102791	118726	172922	129707	134731
Isocitrate	6347.76	4671.37	7529.27	2255.96	2891.75	12624	12964.3	6298.89	4853.95	5929.79	7234.56	6397.42	13156.2	5250.36	41031.2	2798.69	9841.78	4845.95	5863.01	4639.19	6256.96	4659.46	17689.2	362959
Isoliquiritigenin	5423.14	12582.6	10836.1	10292.4	19559.9	21288.7	13928.5	13919.2	12570.7	12535.6	19321.6	11836.9	68206.9	20604.7	55900.7	61159.5	21135.7	32187.2	32779.5	41015.4	24890.7	37091.2	16450.6	26361.1
Isolithocholate	1479.11	775.678	850.661	944.065	1160.89	1346.26	1314.67	1275.34	819.787	1044.55	1708.77	1398.33	1141.55	919.389	1268.2	1568.88	1344.37	579.261	1067.79	1291.46	1219.07	1154.88	1486.5	1348.91
I-Urobilinogen	1721.66	1139.41	1484.14	1309.65	1676.76	1541.53	1600.58	2151.46	1277.3	1442.47	1421.48	1389.65	1101.07	1748.82	1829.9	1152.96	1477.69	1123.65	1687.14	1649.12	1400.12	1538.71	1224.66	1399.02
L-2-Amino-3-oxobutanoic acid	9082.32	13275.9	15631.3	13733.4	3564.95	29306	4727.29	27001.1	13063.7	11436.7	14393.5	14947.2	13403.4	5990.34	16322.7	7692.76	25752.2	10362.8	9819.54	10939.8	8790.57	12249.2	23463.7	36454.3
L-Adrenaline	26670.3	54657.6	61447.5	53394.2	42126.1	73853.4	59296.1	64746.8	59634.1	46222	63521.9	46745.4	244273	95728	61511.2	117633	72356.9	51911.5	54942.4	37651.4	49911.3	142622	64607.9	96398.1
L-Arabinonate	14763.8	5947.69	5118	6479.54	4720.96	6139.11	7521.75	14460.9	15132.4	5964.71	6576.09	6083.53	6818.56	11260.4	21554.1	12024.1	8862.44	7749.96	19296.4	6743.59	9618.65	5304.15	11948.3	62572.9
L-Arabinose	63323.7	70954.8	77528.7	73735.9	68936.2	60308	50392.2	30507.8	65033.1	42364.8	19902.2	64149.9	47235.1	75263.8	39796.4	49046.1	45392.4	39880.1	50685.7	53774.7	23297.3	52881.2	50704.9	31130.6
L-Arabitol	28135.5	27306.4	31055.6	27019.6	26995.2	18742.8	5578.49	45483.5	15524	25260.5	19253	28751.4	26400.7	27636.2	41668.6	20548.8	17144.2	18931.6	31803.8	31635.3	23901.8	52493.2	31326.4	21869.9
L-Arginine	149002	144700	184073	256604	211851	273632	139007	193639	270996	297454	229975	234997	198221	250157	189168	156648	287497	267332	198975	192068	207778	243267	167743	162628
L-Arogenate	7014.82	11362.6	18068.7	19285.6	9302.6	16175.1	12320.7	11174.5	13477.3	14064.9	10752.7	12157.5	61977.6	25208.4	43773.2	28613.3	18226.9	11108	14416.4	8255.98	9106.11	29435.5	14362.6	58672.3
L-beta-Phenylalanine	20942.1	46420.2	62171.6	51382.8	44657.7	70570.4	49532.3	68150	51457.5	45194	78524.4	52316.9	323671	57342.4	75532.1	99350.4	68873.7	42628.3	50263.1	40804.3	47698.5	167489	87591.1	81414.5
L-Capreomycidine	2499.89	3409.15	12288	3509.72	6945.28	10820.7	6925.32	6044.11	4746.24	11058.4	4846.62	12317.6	10141.8	12890.7	5671.05	6843.38	2917.25	3555.43	11844.4	4684.93	5798.36	5131.82	5609.79	7010.03
L-Cysteate	5688.31	4814.85	5375.99	3131.81	5794.93	6188.85	4889.19	11328.2	7807.97	4196.25	6732.09	7287.16	20075.7	7662.79	5493.52	29458.2	6230.34	7407.77	5223.56	5911.62	6344.21	11445.9	6249.71	2150.74
L-Dopachrome	8607.91	8457.18	8508.39	6925.91	5508.67	4969.4	7525.28	10996.5	9602.06	9662.94	3320.41	8127.28	87678.2	8536.66	9602.97	9380.05	4632.98	8212.76	5750.08	5723.09	6876.88	7025.99	8206.89	19839.3
L-Galactono-1,4-lactone	31366.5	40945.5	44986.2	38786.8	38021.5	39558.5	41443.2	41473.3	42052.9	46244.6	35090.8	53585.7	43789.2	44398.5	54572.1	35673.4	31323.3	38194.1	44916.3	56297	17298.4	46834.6	47883.8	176308
L-Galactose	56562.5	68616.1	115954	46964.7	76252.8	87865.8	128944	70339.7	41845.8	69966.6	109194	68908.5	179329	56249.5	114491	121298	57274.1	41741.6	79237.3	105419	48056.2	60408.5	72288.5	55466.5
L-Glutamate	6516.14	5680.25	6392.93	4021.37	5555.05	9376.37	4767.34	8532.46	13876.3	8075.27	21225.8	6459.01	16181.3	9601.55	6652.58	32891.9	6390.38	10871.2	5562.48	4228.1	16952.3	18425	5798.14	3293.48
L-Gulono-1,4-lactone	36210.3	45091	48045.4	52028.1	50410	43076.1	46902	40341.1	47525.6	43777.2	43964.4	55868	60680.3	54570.4	45981.6	43725.4	40035.6	46413.1	53596.3	47356.2	51455.3	43022.7	44801	50982.2
L-Histidine	42608.5	61686.2	70953.8	66906.5	55460.8	83642.8	82812.1	89699.1	75461.7	56761	68988.4	70600.1	267731	97021.3	88055.3	113138	69668.7	58050.7	55622.8	67401.6	60545.8	145033	76003.8	90335.4
Linoleate	227644	865063	1.0104e+06	1.02921e+06	942114	1.07207e+06	1.08888e+06	740809	1.10041e+06	1.10191e+06	1.1107e+06	1.39442e+06	681533	1.33464e+06	1.5899e+06	671626	1.58981e+06	1.3638e+06	1.30461e+06	1.28527e+06	1.51627e+06	1.01416e+06	1.09622e+06	1.20941e+06
Lithocholic acid	334205	291734	355783	457446	392305	446078	274914	381550	520185	571530	399959	481221	393833	577000	351595	285475	502148	522973	413265	364187	391379	433673	380781	362689
L-Methionine	2069.1	2313.39	2239.17	2134.07	2367.7	2414.88	2376.94	2296.21	2511.57	2554.58	2467.96	2468.22	2751.15	2148.32	2654.7	2636.29	2101.58	2463.76	2397.7	2361.93	2228.9	2198.15	2629.82	2440.07
L-Methionine S-oxide	42098.6	20090.2	17143.7	14492.2	23284.1	21579.3	35628.4	60617.7	37799.6	48761.4	46083.6	34545.8	25631.9	16168.5	8450.55	58664.7	35140.7	36139.5	15465.6	19421.7	9408.03	65122.8	43001.5	22507.2
L-Norleucine	1480.09	2650.73	3976.46	2768.49	1373.18	2536.79	2700.02	3887.07	4134.84	4024.52	2848.4	3652.86	5608.62	4850.92	5464.79	4890.06	3276.99	2639.47	1403.17	1655.24	1500.59	3044.02	3802.97	5766.12
L-Phenylalanine	1042.53	2183.98	2015.74	1498.34	1980.54	1902	1975.64	2561.33	1900.59	1410.85	2003.98	1736.17	3773.6	2713.42	2002.32	3174.47	2038.65	1341.91	1452.69	1694.78	1485.24	2377.49	1910.88	33492.4
L-Pipecolate	4832.48	9231.05	8562.05	4300.76	8410.37	9384.93	7056.88	10306.7	4700.74	4171.03	7446.1	8124.65	7252.1	10899	6893.79	6549.07	8069.64	6436.54	9060.45	7576.25	6779.3	8756.73	6632.45	6059.91
L-Rhamnonate	9109.32	14000.1	24385.9	21426	24360.3	13877.8	22919.3	7090.94	9976.33	12250	24248.3	18958.6	42334	13549.1	33078	13273.4	13434.8	10294.5	22499.4	25894.2	24467.5	7644.48	27073.3	41887.1
L-threo-3-Methylaspartate	1066.17	2003.61	3059.94	3401.72	4240.45	3350.64	3518.32	5614.82	2364.33	2103.08	2298.74	3892.92	5638.74	1778.2	3265.29	3507.43	2225.77	2095.97	1108.51	1874.55	4367.39	3300.5	4451.49	4078.43
L-Threonine	32957.6	13145.7	18199.6	13483.8	9578.43	11117.8	18813.8	23353.8	17861.5	21392.3	14143.8	17591.8	7117.27	10398.1	14002.6	9473.61	11485.8	10093.6	15828.1	16060.5	8187.1	7760.83	15846.1	8497.06
L-Tryptophan	48279.7	68187.3	107085	112756	69639.4	98353.9	84876.9	79809	89671.5	88897.4	104107	116582	347825	156920	128986	91589.8	110860	92190.4	102086	78457.8	102582	240565	178512	128446
L-Tyrosine	2359	2646.9	5615.14	5376.71	5003.62	6579.43	12029.8	11652.2	2922.23	7083.26	5660.33	7448.87	3603.26	5056.9	8645.62	4711.84	3867.49	3021.53	3950.38	5263.01	6697.09	2114.88	6797.31	4550.18
Lumichrome	126699	139026	165626	157071	137170	171641	165582	182298	164177	170286	228012	196310	151099	190905	246500	139853	199971	183667	167113	167975	166162	196594	196459	181543
L-Urobilin	2892.56	3379.46	4939.09	5347.14	5287.03	4116.14	4717.75	6226.42	4726.2	5440.17	3848.81	4985.33	6176.29	6847.77	4552.05	4415.35	3729.86	4918.62	5149.76	4485.9	9620.28	5968.3	5197.86	6527.27
L-Valine	3168.38	7402.16	9556.97	3059.62	4443.17	4388.53	4043.96	8488.56	7424.86	3938.86	3484.97	2977.1	10234.6	6545.52	3363.36	21403.9	2923.54	5286.35	2300.46	2358.86	2368.12	5952.58	3355.97	9389.12
Methyl (indol-3-yl)acetate	14860.9	15250.8	16919.9	16178.5	16943.8	18280.1	17688.5	15489.7	14912.3	16155.4	16095.7	15111.3	15622.1	15236.2	16089.7	16920.6	15971.9	15300.3	16439.8	16393.8	17466.8	16127.3	15919.7	15657.1
Murideoxycholic acid	43624.6	20488.3	25644.3	20364.2	14781.8	30719.6	19474.9	36957.6	17567	20299	35385.5	15512.6	12367.8	13628.1	11526.7	12815	11422	15047.6	24935.3	20997.7	11655.5	14989.9	13801.9	7865.42
N(alpha)-Acetyl-L-2,4-diaminobutyrate	1101.14	1731.29	4024.53	2396.33	7815.86	7379.5	1995.93	3670.9	2829.05	1879.18	1481.35	3234.37	1774.7	1810.96	10203.3	2050.78	6958.08	2654.27	2265.94	6346.34	13439.8	2025.24	1901.78	7611.86
N(pi)-Methyl-L-histidine	1693.1	7304.11	4727.94	6046.3	6045.04	5432.58	5680.11	3328.37	4284.72	3881.31	5088.99	5360.89	6156.86	5640.58	6355.93	4523.25	4931.73	5676.77	5830.14	5780.46	7870.63	5668.15	5505.86	5905.53
N1-Methyl-4-pyridone-5-carboxamide	810.853	1044.49	1356.97	784.637	1196.14	573.232	759.19	1283.27	12.782	1086.18	508.636	974.705	1114.81	1257.7	1073.58	842.498	521.165	637.073	889.547	769.844	671.872	957.085	1129.2	768.855
N2-Succinyl-L-arginine	1091.02	4376.48	5329.34	4513.78	5122.33	9298.77	2576.38	5417.78	4419.13	4990.53	5086.89	8838.89	4741.14	5170.08	35497.2	6391	3811.3	4564.41	5198.95	4956.54	2086.62	1507.46	14466.9	325585
N4-Acetylaminobutanal	1868.25	2287.9	1986.98	1725.21	1944.21	2087.2	2015.35	3166.47	1704.07	1988.87	2285.07	1986.01	2003.58	2448.22	2423.87	2351.78	2206.07	2750.98	2000.95	1586.56	2361.9	1315.81	2564.75	2362.65
N5-(L-1-Carboxyethyl)-L-ornithine	1253.65	1545.32	2587.46	6842.84	6124.2	5861.74	7778.51	1872.64	1836.87	5262.65	6782.6	4753.69	4325.11	3841.28	8621.41	2197.17	5766.64	4550.98	8343.71	7715.08	13047	5086.16	6097.81	6202.02
N6-Acetyl-L-lysine	2650.31	2677.6	2987.51	2105.07	2716.43	2406.96	3773.32	3453.57	2246.98	2175.55	2368.45	2896.3	2017.32	2720.95	3230.35	3710.49	2940.39	2343.16	2582.31	1355.81	3151.41	2274.35	2920.18	4856.3
N-Acetyl-L-aspartate	4172.27	3126.97	5828.88	9749.72	5329.98	8000.03	3856.83	24109.2	6744.28	7470.49	11806.4	2580.06	6759.15	6219.47	12279	3354.25	11703.4	2457.97	8895.87	9035.16	8932.43	12550.4	4561.52	10873.7
N-Acetyl-L-citrulline	1680.75	1690.9	1604.89	1472.09	1330.56	1975.04	1643.81	2646.96	1690.19	1794.63	1517.68	1632.97	1249.17	2322.45	899.416	1992.41	1021.93	1317.11	994.931	1071.5	757.002	1535.05	441.195	335.281
N-Acetyl-L-glutamate	39231	55508	48505	40885.8	35488	16822	44138.8	75860.8	50631.7	31340.3	8513.05	32285.3	18926.7	19551.9	12377.7	29764.9	26672.8	20784.6	18033.3	20305.4	9103.07	10969.2	31489.3	27000.2
N-Acetyl-L-leucine	6867.25	13989	13232.4	9725.48	5837.84	16268.1	7646.7	13422.2	13140.3	8872.19	25316.1	8952.35	30207.4	17878.3	27207.5	35316.6	12603.3	10873.2	5839.7	5771.65	5606.5	14476.1	16222.8	127900
N-Acetyl-L-phenylalanine	946.599	999.488	1356.97	1577.9	1109.7	1150.52	1044.43	847.227	890.865	1114.72	1002.42	790.625	1543.56	1116.94	1061.95	1160.88	1039.56	1331.63	788.987	1126.43	2205.39	1398.39	1633.63	894.277
N-Acetylneuraminate	32406.7	43389.2	32896.6	22600	33676.5	32123	35912.5	24388.7	32704.6	32523.6	103323	36028.3	26870.3	117492	25933.7	27562.9	34349.9	36335.9	34482.7	81976.4	33661.1	148131	35418.5	151661
N-Acetylputrescine	5050.4	5994.97	8935.81	5838.9	4050.28	5065.49	7486.44	8107.54	3714.48	3861.56	5650.58	4854.53	23630.2	7183.67	8859.46	11119	5050.62	4534.02	4047.87	4783.64	6569.92	10319.3	5066.49	13668
N-Acetylserotonin	3459.95	5023.42	6813.56	3375.88	2569.72	3883.31	6682.58	6682.15	3015.46	2894.16	5260.03	3254.86	19890.7	6298.59	6898.47	9622.17	4322.42	3553.69	2507.9	3095.94	4943.91	8381.68	4338.86	10556.4
N-Benzyloxycarbonylglycine	235620	1.53212e+06	1.7602e+06	2.09085e+06	2.14034e+06	1.76673e+06	1.67327e+06	1.58542e+06	1.21477e+06	980846	1.62778e+06	1.61968e+06	1.71655e+06	1.74271e+06	1.76569e+06	497188	1.03878e+06	722517	1.31889e+06	1.30671e+06	1.50244e+06	1.12441e+06	1.68818e+06	1.52273e+06
N-D-Ribosylpurine	18668.5	17151.7	24752.3	23770.3	13769.1	14271	14886.7	11175.4	19547.7	12005.9	6946.77	23019.4	31494.7	26719.3	27133.9	20865	18126.2	22457.4	23846.9	17940.5	10045.5	23165.1	19487.4	17896.3
N-Formyl-L-glutamate	12939.1	14152.7	14301.5	12176.9	10651	12436.9	13343.1	15635.9	13641.4	14075.7	10724	16462.4	5743.3	15887.6	12978.4	6737.75	9802.71	14252.6	11852.1	10561.5	10049.2	9736.38	13284.5	8123.12
N-Hydroxy-L-phenylalanine	5715	4568.56	5093.32	5966.63	7013.3	5225.01	6297.99	8003.86	9063.88	5351.36	4810.83	6168.46	6926.26	5885.19	8768.94	11899.4	4106.61	6652.41	14599.3	5309.64	3713.77	7187.03	22340.5	9304.06
Nicotinamide	8537.37	7195.97	6660.49	4306.51	5515.42	5104.96	6041.5	12533.4	16824.7	11648.3	6102.36	4589.61	14542	9912.2	3857.82	13427.8	6040.7	6859.39	2456.28	2296.99	8385.85	10854.8	3645.55	4422.48
Nicotinamide-beta-riboside	51234.7	65367.3	67046.2	82786.5	81298.1	78511.3	77766.3	98082.1	81920.5	74560	65884	84679.1	81585.8	89951.3	66626.6	80565.8	72685.9	100210	79371.4	70675.5	68605.4	79491.5	65211.1	62865.3
Nicotinate	6051.22	7956.69	5026.69	6360.41	9542.83	12682.9	15207.5	17109	15923.1	12829.1	8296.8	8551.45	8724.79	12710.4	8429.44	6499.79	15236.2	11941.9	6386.1	5378.19	547.724	6645.22	10362.1	22435
N-Methylanthranilate	12808.5	12723.7	12003.5	16233.2	13282.3	14609.9	12930.2	17210.6	17509.7	15415.7	11128.9	16831.6	11902.5	17948.4	14563.8	13751.6	15174.7	13737.5	17015.9	14019.8	13564.1	14249.9	12174.8	10560.5
N-Methyl-L-alanine	146339	244251	389587	415499	584242	870060	259630	732094	406787	911420	421238	195631	469773	207562	355398	127699	426762	308293	632690	643401	338744	556623	420345	568435
N-Methyl-L-glutamate	12412.3	18624.5	11760.8	5565.19	6756.67	11609.8	7683.39	12053.1	13127	9319	11190	7906.67	50071.8	16157.4	5449.03	81239.8	10141	13329.2	5813.04	5123.08	1193.63	25686.6	8001	9354.17
N-Succinyl-L-glutamate	11376.4	18200.6	19258.8	14474.2	14018.3	14489.2	15702.8	18838.2	15438.9	16140.6	6726.79	11388.6	19702.2	19421.3	12894.5	15394.9	11198.3	8073.06	18360.7	15634.7	8372.9	15106.6	6528.93	16568.4
Octadec-9-ene-1,18-dioic-acid	5009.63	2064.22	2514.85	1768.67	3667.18	1314.4	1111.33	1529.19	3722.59	3662.59	3757.33	4994.94	12720.7	3564.27	3024.51	20469.6	1888.66	2557.2	3735.99	4294.57	2472.26	4448.25	1185.68	3653.83
Octadecanoic acid	111954	76980.2	64895.7	73402.2	63906.1	98550.3	70936.2	89438.7	77060.4	74033.2	71056.8	58427.8	50729.7	61982.5	55045.4	79325	82572	81003.2	65002	58080.4	84311.1	61950.3	80874.9	74801
Oleamide	287.844	343.072	566.206	2169.21	1069.03	2731.42	4884.99	1027.39	199.404	2252.9	2583.32	2552.4	3073.88	1712.45	9649.91	608.098	2422.77	1068.71	2694.2	2871.15	1769.25	1922.48	3078.01	24842.3
Ophthalmate	3322.95	3706.14	3205.24	3293.82	3101.58	3386.47	2585.7	2998.15	3353.29	2986.72	2943.36	3034.91	2955.33	2916.3	3113.98	3196.83	3403.33	3878.84	3022.26	2549.45	3149.94	3426.34	3378.59	2584.83
Pantothenate	2932.65	2894.73	2314.13	2277.8	2821.86	3177.6	2438.51	1783.76	2768.39	2384.04	2560.34	2834.69	2170.66	3344.14	2294.76	2679.58	2445.33	2160.25	1837.77	2903.91	2678.66	2461.58	2619.14	2714.23
Pantothenol	479.073	477.107	1341.63	1287.06	1012.87	784.402	779.032	1241.28	577.008	1111.26	491.322	1283.71	1866.82	1326.01	1330.92	928.851	1065.32	1113.08	824.916	830.455	1923.37	1065.6	1237.12	1707.15
Parapyruvate	4756.16	4875.3	4935.96	5709.28	5867.62	6145.11	6502.93	6142.18	5099.08	4768.86	6519.19	5323.16	7691.83	5673.7	5599.34	6123.45	5727.6	5111.79	5360.48	5522.57	6818.7	5891.6	5710.03	5373.31
Penicillin G	22921.3	64866.7	81409.1	64878.3	73979.9	116661	65304	66651.5	33134.5	35027.4	50298.9	46517.7	64271	47037.2	31825.9	81128.3	56410	76656.2	43776.3	45961.9	49258.3	57662.1	33786.9	35288.1
Pentadecanal	63280.8	35914.5	19219	21814.9	33584.5	22621.9	33452.2	56551.4	43137.9	26024.7	11928.9	30667.7	8020.6	31989.8	18171.6	14520.7	20667.9	19681.3	28292.1	16947.6	20825.3	12924.7	11557.9	16323.4
Pentane-2,4-dione	23100.3	16299.4	21297.8	39585.6	38993.9	42817.7	36254	41532.8	36945.2	39449.3	31336.1	40220.1	54194.3	50726.7	52200.2	34711.7	42495	29683.7	41880.2	37462	51786.2	51891.4	50501.2	109558
Phenethylamine	1234.13	2564.91	2050.45	2066.19	2512.29	3329.8	1962.51	4377.9	1737.09	2557.48	1362.54	1641.32	1344.77	2058.11	1845.45	2237.7	1508.16	1828.07	1604.26	1601.01	1377.3	2397.85	1579.13	1726.49
Phenol	916.204	992.372	1671.1	2748.69	1274.66	1769.81	1431.12	1019.71	801.65	2770.27	3790.78	1959.24	3042.07	1488.26	7296.36	858.358	2243.81	1498.66	3158.23	5324.5	5592.68	2217.46	5502.15	8404.87
Phenylacetaldehyde	4971.74	4679.84	6115.59	6183.38	19493.5	7762.33	7049.41	6750.62	5525.82	6172.97	7320.23	7836.11	11395.5	7974.16	13808.7	6600.04	4176.01	7396.75	7200.74	7691.17	18975	5916.41	26223.7	16331.8
Phenylacetic acid	5249.11	6460.23	10526.6	3281.57	2454.93	4713.18	2426.03	9865.63	16104.4	6221.79	6533.71	3937.99	23548.8	9595.08	5967.48	7305.51	4446.3	5949.31	3163.94	3708.39	4710.46	31220.3	6958.78	3789.21
Phenylacetylglycine	9869.95	8535.67	14230.6	13502.9	12364.8	15250.1	11536.1	17130.4	14023.4	13304.9	10737.8	11655.2	18029.9	13434.8	14132.6	10643.1	11065.1	11371.5	12787.4	14096.4	16075.7	18459.6	17307.4	16520.6
Phenylethyl alcohol	50915.8	47073.1	45685.3	49203.9	48437.2	48197.5	48706.7	44949.4	46965.7	48070.3	45454.4	47712.9	46236.8	47645.8	46202.8	45507.4	48412.7	48743.6	50165.6	48438.3	47911.2	48615.9	43672.1	44657.4
Phenyllactate	1583.03	1676.55	975.272	1101.46	846.838	1170.8	1330.38	1064.83	1182.16	1101.57	1218.75	1406.72	1141.72	1056.57	955.742	1061.76	972.878	1096.46	986.865	1311.62	1038.86	1329.08	1201.83	901.643
Phenylpropanoate	36815.8	58907.2	102935	12649.9	20137.8	36091.7	18035.1	54115.7	60743.6	14331.2	15240.1	19131.1	192550	75246.6	17615.8	136312	23220.2	68273.3	14552.3	12315.8	27049.5	109951	18494.6	12174
Phenylpyruvate	19153.2	28157.2	29679.3	32886.1	33037.8	28844.5	30587.1	36229.3	36009.2	33064.8	27709.5	33205	47225.9	43315.4	42063.2	29277	27514.2	35153.8	34930.4	32025.1	50561.7	44816.2	37515.8	42118.9
Pimelate	29177.9	44870	43980.3	42343.8	48705.2	41154.9	49861.5	63304.8	46462.8	43383.5	34602.9	53405.2	48349	66714.7	45115.6	53710.4	31821.4	48489.5	45833.9	45038.4	48389.8	46023.6	40986.2	72228.1
Pregnenolone	3538.7	17689.8	18607.1	23007.1	20567.5	23643.7	22971	16609.5	22154	18756.9	22474.8	28961	17005.5	28988.2	28005	13479.1	22845.2	23358.4	24121.3	22095.2	28662.3	16374.8	17293.9	24045.8
Progesterone	29077.1	13583.8	12919.3	8200.25	5360.95	12450.3	10360	17391.2	11099.1	7376.98	10289.3	12716	4623.54	23650.8	7865.55	12516.7	10775.4	14781.7	12819.5	17006.1	10041.8	8017.01	8545.82	2712.49
Pyridoxal	4602.21	5260.95	4857.41	5216.83	6856.42	5355.02	5940.52	5249.99	4277.76	5225.86	7073.47	5238.16	5116.3	5408.1	6602.25	5829.35	4745.81	5244.2	6145.38	5288.6	6922.84	5890.61	8254.8	5946.27
Pyridoxine	6152.34	11212.1	11393.4	11000.9	9907.03	8747.83	9019.16	12558.7	12363.8	9123.52	10648.8	11512.9	12127.6	12995.2	11299.2	10454	9186.43	13124.4	11802.7	11040	17778.2	14152	12063	13105.6
Quinolinate	3884.94	5351.95	15733.4	8539.66	3434.24	5738.73	1669.11	4510.76	10922	12816.8	14359.1	11969.3	16708.4	9681.51	22776	6566.55	8108.46	4368.96	3750.47	3064.71	542.723	5928.7	6582.77	7624.54
Reduced riboflavin	33687.3	34500.3	32788.1	34873.8	33987.4	33151.2	30587.6	33192.4	34944.5	34015.3	37504.5	31866	36093.6	35831.5	27419.6	33484	34039.9	36095.7	35297.8	31698.7	27535.9	36718.6	31919.4	25635.2
Riboflavin	2426.89	2317.3	1866.59	2427.58	2420.26	2298.31	2228.12	2446.97	2184.65	1487.11	1907.82	2216.39	2242.48	2125.2	1488.06	1806.58	1337.02	2219.96	1488.44	2179.35	1942.12	2114.5	1296.23	2141.61
S-Adenosyl-L-homocysteine	42057	50380.9	60493.4	7544.82	35440.1	27954.9	34020.4	61334	80174.5	36205.1	16886.2	40151.8	45909.2	44324.9	39271.9	52922	32066.9	41175.1	34865.3	40753.6	18781.8	37093.9	37184.1	30861.8
Salicylate	2560.53	3707.91	6070.02	2857.85	2843.24	4465.14	3070.56	2666.45	3656.76	2993.24	6175.3	2621.35	12131.1	4139.19	4897.37	4415.63	3863.11	2819.48	3644.4	3305.59	2830.23	5710.5	3814.68	4695.78
Sarcosine	4067.24	4519.09	3912.53	4142.12	3758.65	4247.02	3821.67	2931.13	4228.68	4927.07	3647.43	4013.19	3739.65	4215.55	4215.43	4352.52	4276.38	4872.3	3788.47	4046.86	4345.96	3847.57	4131.17	3772.97
Serotonin	4600.2	1389.4	2150.51	1746.08	1870.64	2113.8	2057.96	3003.03	1479.06	2479.59	1615.84	1803.72	1042.74	1570.73	1790.63	1690.02	1349.11	940.256	1873.33	2725.99	2117.4	1410.75	2201.38	1835.73
Sinapine	29268.2	20771.7	19922.7	14689.2	17305	24503.1	18288.8	26979	27283.9	18203.5	20799.9	24754.7	15534.3	20307.8	17682.1	20687.6	22541.9	17217.3	16989.5	18507.3	21905.8	20689.3	27635.9	15452
Stearidonic acid	5686.19	26061.1	40165.7	43535	31740.2	36935.3	43273.4	20703	35237.2	34461.1	34370.2	57080.9	27603	40311	46797.8	16575.2	36835.8	34480.1	51486.5	45193.1	58062	32202.8	40089.3	52172.9
Styrene	26773.3	20495.9	19481	19973.8	21855.6	22570.4	18178.8	17347.9	21059.5	23055.7	20910.5	21172.8	21222.2	18323.1	19652.1	20859.4	19575.7	19311.4	21972.5	21001.3	18813.1	19463.7	18375.5	18427.8
Succinate	3582.82	3688.29	2785.52	12775.1	1135.9	3840.68	2460.66	5897.46	5931.48	10591.4	12212.4	14726	5814.56	7730.68	19793.3	5713.31	3014.28	4434.33	21457	20541.6	34983.5	6893.41	15037	46780.5
Taurochenodeoxycholate	31920	34587.2	38301.9	160084	52358.6	92694.6	23724.5	97959.8	72636.8	66347.9	114147	24301.8	48597.7	72999.7	117913	17741.7	105965	21350.5	102678	128076	67711.6	446850	54818.6	288219
Taurocholate	3308.93	4836.37	5380.79	6744.44	5103.3	5232.64	5877.35	6317.77	1940.87	5124.47	4437.24	1476	7706.94	7850.4	6991.08	5703.08	3855.53	4784.94	5085	6252.09	8987.46	7328.94	7348.15	7730.99
Taurodeoxycholate	1692.31	1730.97	1888.41	1460.43	1382.93	1493.83	1691.79	1166.43	1198.27	1838.85	1934.69	1627.06	1854.71	2045.8	1506.39	1714.32	1901.56	1875.36	1746.79	1612.82	2093.16	1941.4	1698.72	1990.63
Taurohyocholate	1154.21	1390.43	1684.17	2238.62	1982.31	1382.92	1798.58	2364.7	2226.03	2111.37	991.107	1885.59	1957.86	2104.22	2306.47	1887.76	1455.42	2191.12	1555.16	1138.59	2978.32	2346.03	2148.97	2711.03
Tauropine	12438.8	13485.2	15909	16122.7	14061.2	16014.9	16347.1	16151.2	15242.1	14489.8	25175.2	17589.3	12243	19319.1	15103.4	11494.6	10667.3	17255.9	17677.6	12248.2	33548	19017.4	14530.9	14246.7
Tetracosanoic acid	4628.96	5076.81	4508.06	3999.34	5057.98	5901.21	5307.27	6505.58	6884.15	4681.74	4173.13	4214.16	5398.48	5852.75	4637.6	3998.13	4177.3	4341.83	5390.55	3962.46	3943.97	4866.97	5210.31	4637.22
Tetradecanoic acid	17841.6	32617.8	24197.7	18946.8	18605.9	26363.2	23123.1	25889.4	19546.4	14291.5	17073.9	21240.4	16976.8	31992.7	17720.2	23532	17833.5	23089.6	17681.3	16429.9	19396.4	15109.8	14501.3	17858.4
Tetrahydrocorticosterone	11728.5	8445.96	10042.9	8878.71	12545.4	14537.8	4304.91	10441.8	9266	12647.8	16759.2	13897.6	5254.66	12769.3	16541.9	9725.42	13648	14287.1	10874	20066.3	13306.2	12637.9	24179.3	10461.7
Thebaine	3698.18	5357.55	3907.61	5760.77	2703.99	4558.09	4115.73	4661.37	4943.25	4023.24	1933.02	5043.2	3857.43	5939.07	9536.78	4034.96	4761.32	6640.4	5502.64	5122.54	4253.43	5659.56	5673.67	3932.23
Threonate	3944.97	3201.59	2460.85	4816.82	3708.15	3526.64	3937.65	2096.3	3332.24	2197.89	4335.83	3825.35	11449.9	5984.52	9687.52	15456.5	4959.54	4979.88	4703.52	3866.18	13974.3	8979.92	7282.54	60993.4
Thymidine	11381.3	10703.9	11331.6	11432.9	11334.9	13341.3	10376.5	10023.9	11243.4	11720.3	11792.8	11428.8	11771.3	10523.9	11095.9	12116.4	10035.1	11161.1	11862.6	11868	12377	10871.8	10610.4	10955.2
Thymine	3167.8	5377.87	5790.1	5763.5	4674.47	5041.4	5308.45	7221.92	7859.51	5980.54	4787.66	4626.99	7737.84	7925.26	6887.35	5390.66	6620.36	5589.04	6419.15	7202.24	9228.1	7068.14	7434.31	7110.46
Toluene	1099.51	1850.96	1391.17	1914.18	2025.2	1803.67	1740.28	1707.32	1456.74	1259.16	1332.72	1841.78	1350.43	2044.27	1737.55	1010.25	1485.2	2086.77	1795.77	1732.8	2100.05	1816.31	2081.47	1619.74
trans-beta-D-Glucosyl-2-hydroxycinnamate	24633.9	32804.6	50146.6	52299.7	43465.8	29820.9	39943.1	30842.2	46039.7	33539.4	38522.9	28832.9	25887.8	44005	30012.2	8181.32	13967.8	52136.2	34903.7	41831.1	21594.8	27027.4	37917.6	21374.9
trans-Cinnamate	5286.51	6595.52	6888.59	2781.17	4170.4	5282.16	5400.95	9773.9	7997.5	4885.82	3402.19	7011.91	20298.6	9725.03	3912.7	30857.1	5452.84	9079.12	4499.23	4231.43	9467.51	12836.3	6043.25	1902.52
trans-o-Hydroxybenzylidenepyruvate	5968.53	5547.62	7148.55	10649.4	8603.84	6765.27	8728.38	9220.34	10283.4	6839.15	7677.38	7897.13	7869.65	12708.4	10491.1	7667.45	7586.71	10757	10756.9	8101.2	11013.1	4788.45	9718.69	9199.39
Traumatin	68903.9	51699.1	56124.2	7873.45	3522.91	25756.1	22685.9	69766.1	64315.5	59942.4	38630.3	23703.4	15581	21608.2	17467	13144.7	35408.1	29056.8	13801.6	21721.2	9981.53	25350.1	40274.9	11330.3
Tryptamine	1397.29	1704.39	1750.9	1542	1268.11	1413.18	1552.02	2904.71	1435.45	1288.17	1931.95	1290.09	3148.47	1597.13	1372.76	2619.08	1519.64	1259.16	1088.51	1146.27	203.322	1446.56	1572.08	5303.71
Tyramine	4076.4	6854.79	6704.71	7114	7273.43	6803.75	7633.86	7536.63	7558.61	7831.12	5829.59	8363.8	10414.5	6623.27	5049	4816.89	3813.47	7937.08	7085.61	6105.26	5183.98	6509.17	4124.54	8005.1
Uracil	1886.95	1774.76	1186.91	1756.07	2113.49	2296.15	1293.53	1220.28	1592.11	1659.25	875.085	1726.14	1289.62	1896.36	2075.28	2075.41	1736.75	1568.87	2220.92	1903.37	1472.82	1736.36	1888.16	1567.27
Urate	27310.9	27018.1	19460.4	18717.3	16900	16257	16425.8	16467.1	27499.6	22437.2	20797.4	17546.9	15712.5	17585.5	16964.4	17862.3	20980	21405.2	20314.3	17906.1	16703.5	16235.6	18550	17400.2
Uridine	43175.8	44718.6	62300.6	63587	53637.4	69154.7	51312.6	80272	62127.8	71465	45030	58871.1	77838.2	58179.3	62391.8	48938.4	55707.8	50260.8	52782.7	55918.9	55962.9	94277.6	81211.7	63715.9
Urocanate	767.779	1178.77	1806.77	1139.93	1537.45	1412.26	924.764	1789.18	1444.52	1220.28	1535.51	1122.7	7437.28	1405.2	1797.42	2977.83	1314.29	1009.74	984.346	757.437	173.467	3637.29	1638.64	1852.54
Veratraldehyde	1359.39	2627.24	2888.26	3639.59	3101.37	7257.67	6072.08	2411.06	2580.14	3555.16	3893.3	5889.1	2803.25	2229.97	6287.7	1692.59	5117.12	4869.36	6143.64	7764.04	10311.2	3232.48	5501.97	9796.68
Xanthine	1466.03	2310.62	3365.59	2508.73	2686.13	2353.9	2463.83	1474.65	3758.46	1664.97	2607.16	1955.55	5148.1	2272.55	4122.99	1574.5	9001.73	1579.5	2180.35	3304.84	3738.45	2154.51	3070.4	4159.08
Xanthosine	2806.41	2948.93	3369	2838.4	3279.66	3408.43	3348.04	3469.18	2980.64	3276.65	4238.71	3346	3184.48	3277.78	3617.04	3526.71	3299.83	3168.44	3932.07	3638.3	4281.08	3492.13	3391.45	3585.08
Xanthurenic acid	18157.4	21375.4	15270.4	3661.71	3595.93	14734.2	11498.8	3716.67	3540.26	4013.76	14594.3	11435.9	14785	4210.68	13664.4	3356.97	3641.09	16854.1	3814.55	3514.49	3953.79	3727.28	3927.65	11244.7
Xylitol	69738.9	79566.5	72098.7	59992.6	63150.9	47997.5	48374.2	49639.2	59770.6	51284.6	60474.2	74096.3	57720.9	53630.6	51950.9	73236.2	38147.4	52928.9	56712.7	65563.3	69389.5	57015	76388.6	27854.6
Zeatin	800.688	906.464	1363.09	1256.2	1326.89	1433.35	6983.42	656.182	1469.98	1356.7	1136.18	1397.99	1271.71	1029.7	1144.61	6460.89	1171.52	1491.1	1232.27	7202.85	860.519	1283.73	1440.67	1014.56
