# Supplementary figures and images for: Salecan ameliorates liver injury by regulating gut microbiota and its metabolites
Source: Royal Society of Chemistry journal article supplement (doi:10.1039/d2fo02210a), 2022-01-01

Fig. 2

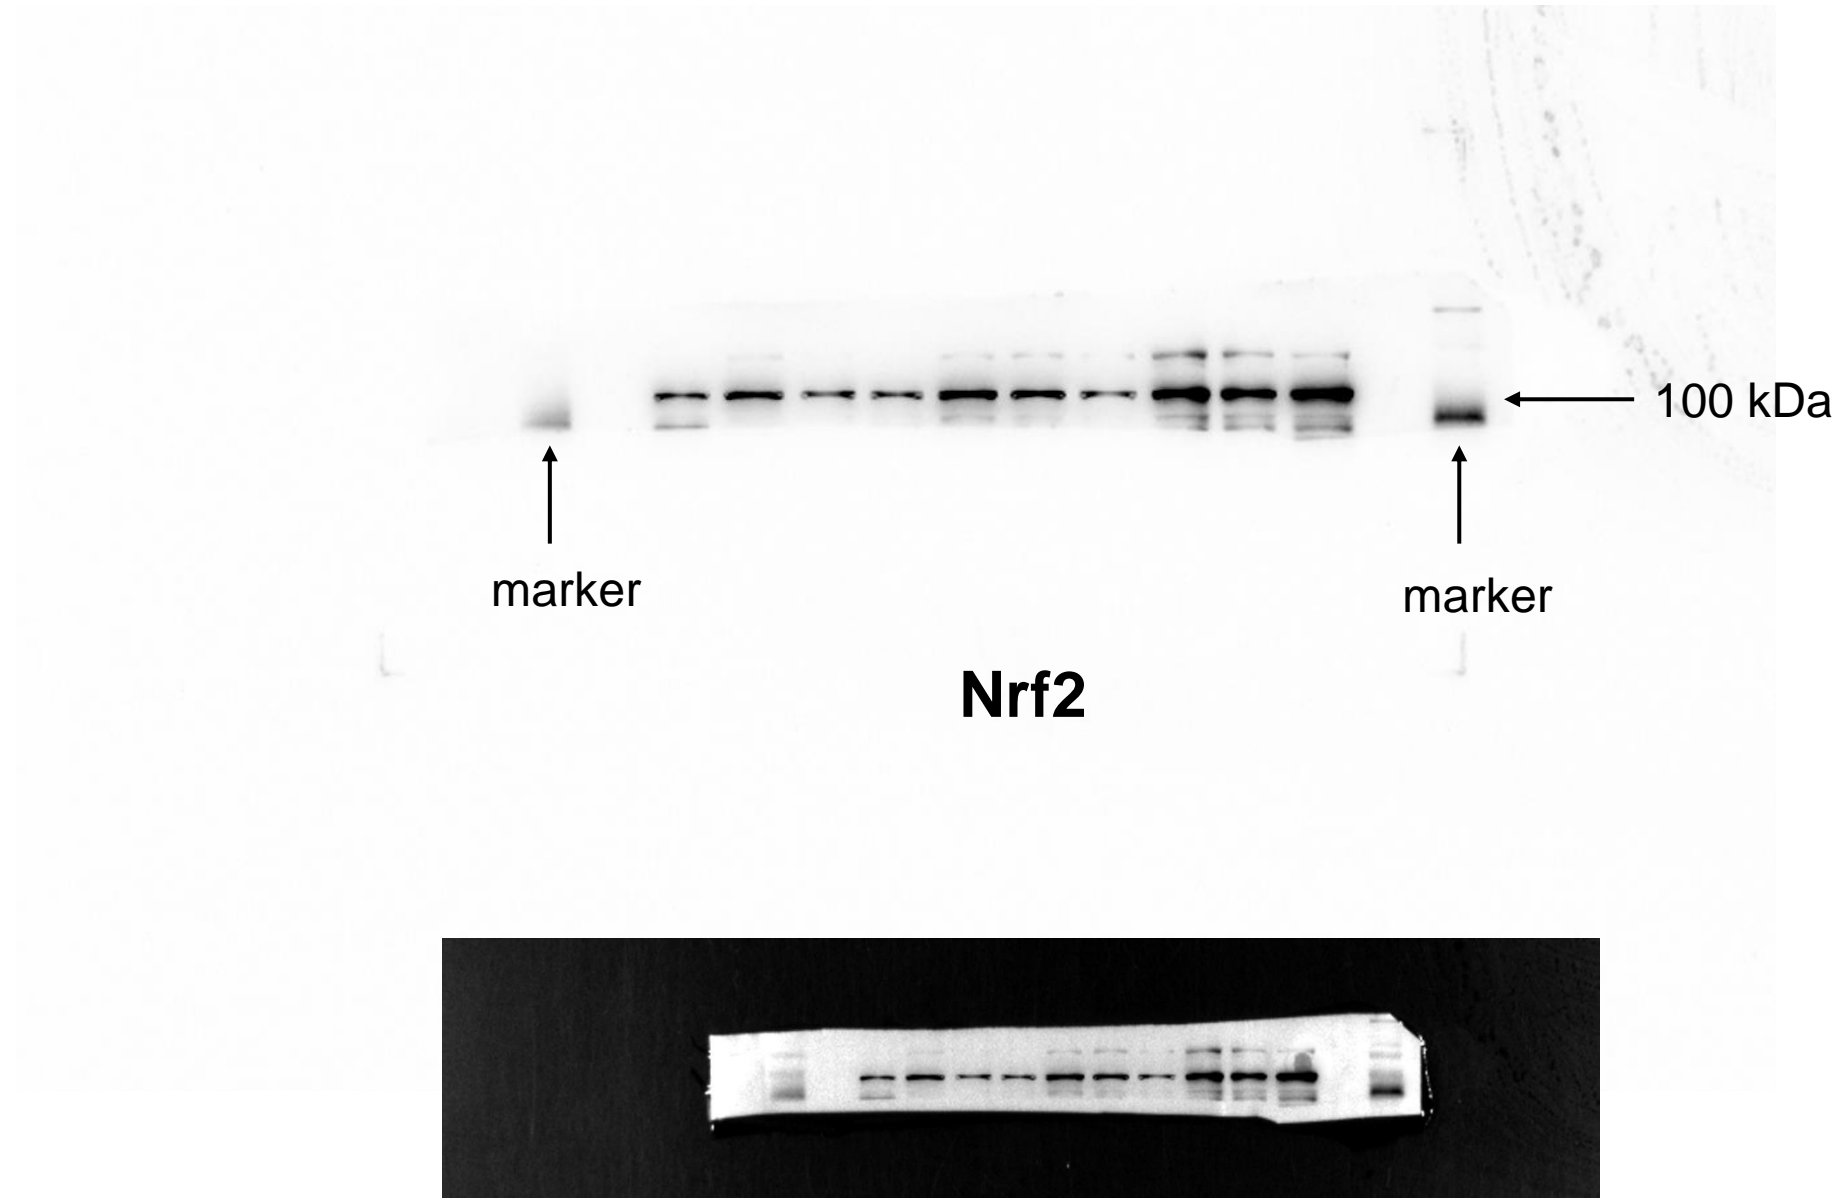

Fig. 2

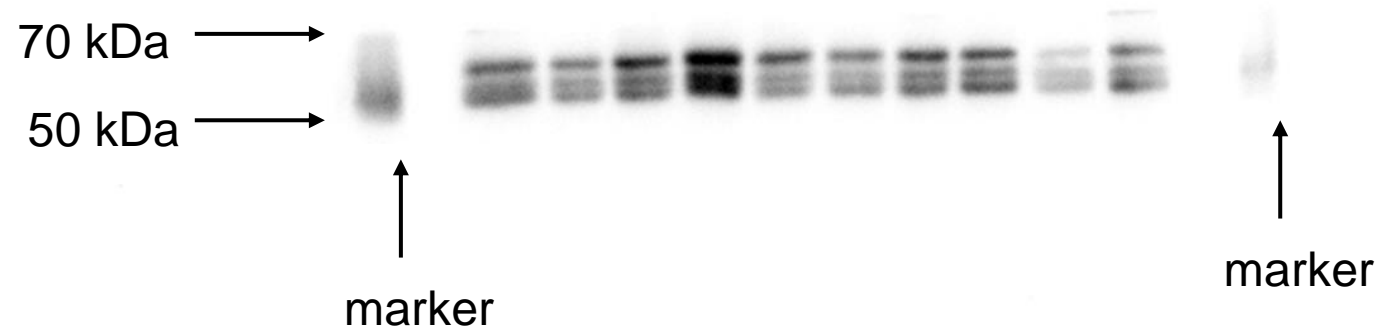

**Keap1**

Fig. 2

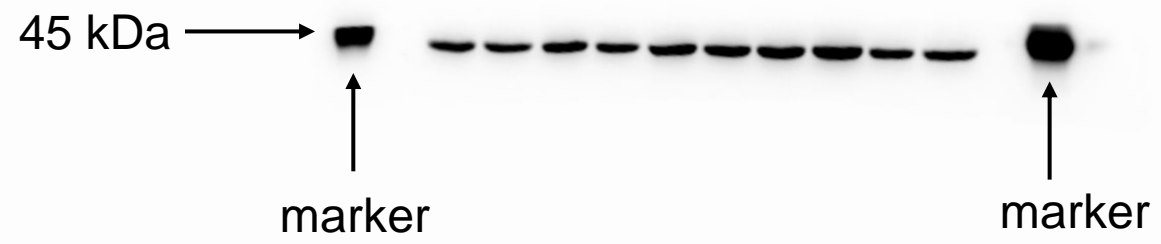

**$\beta$ -actin**

Fig. 3

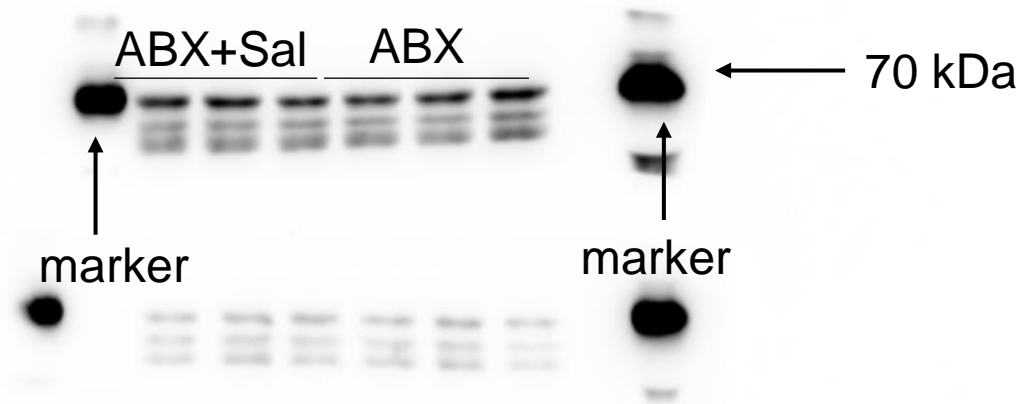

**Keap1**

Fig. 3

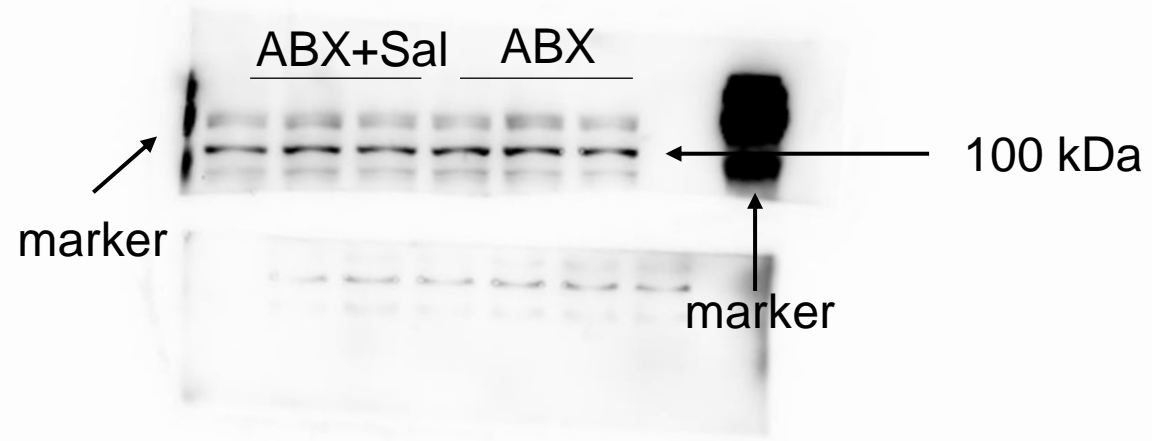

**Nrf2**

Fig. 3

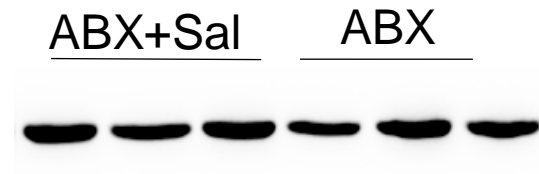

**$\beta$ -actin**

Fig. 5

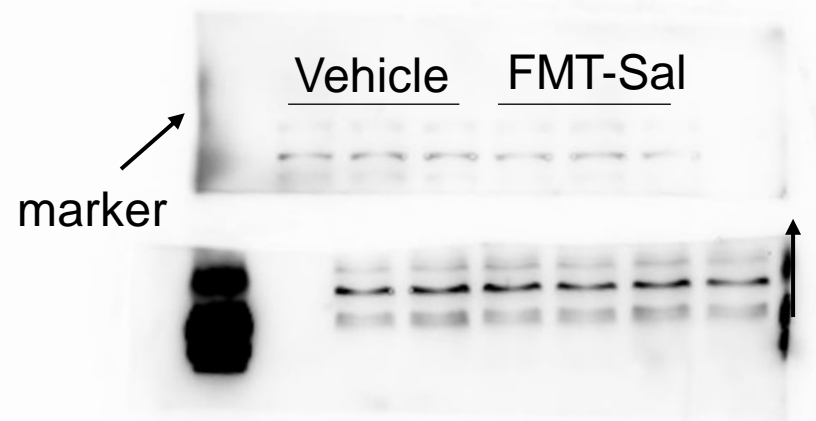

**Nrf2**

Fig. 5

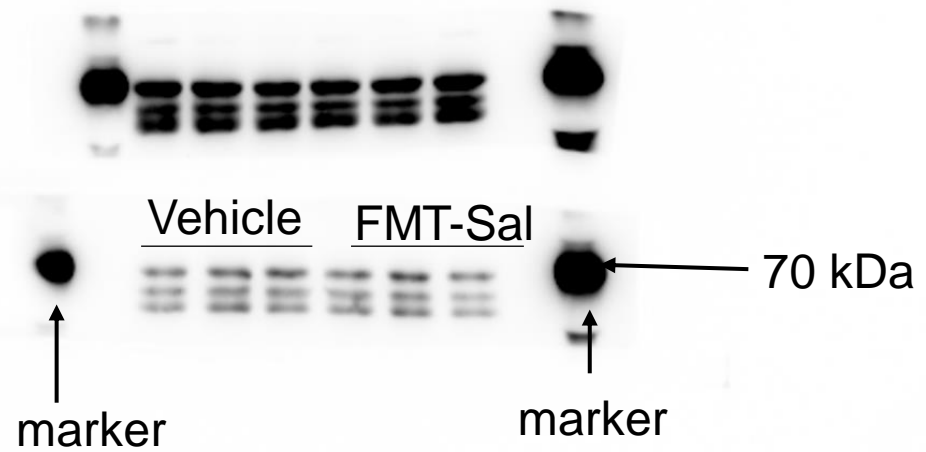

**Keap1**



Fig. 5

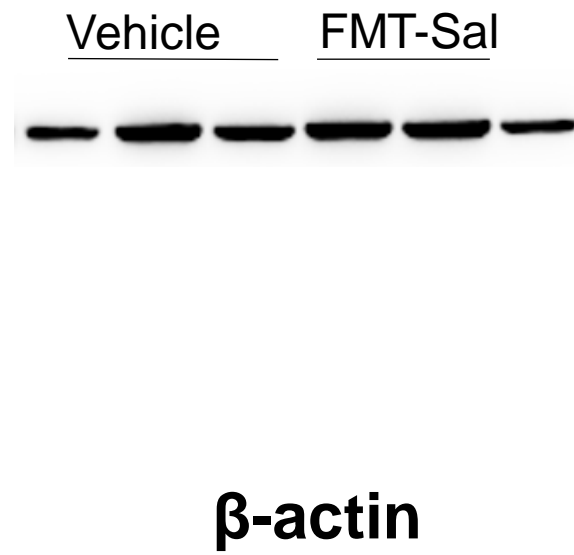

**Fig. 6**

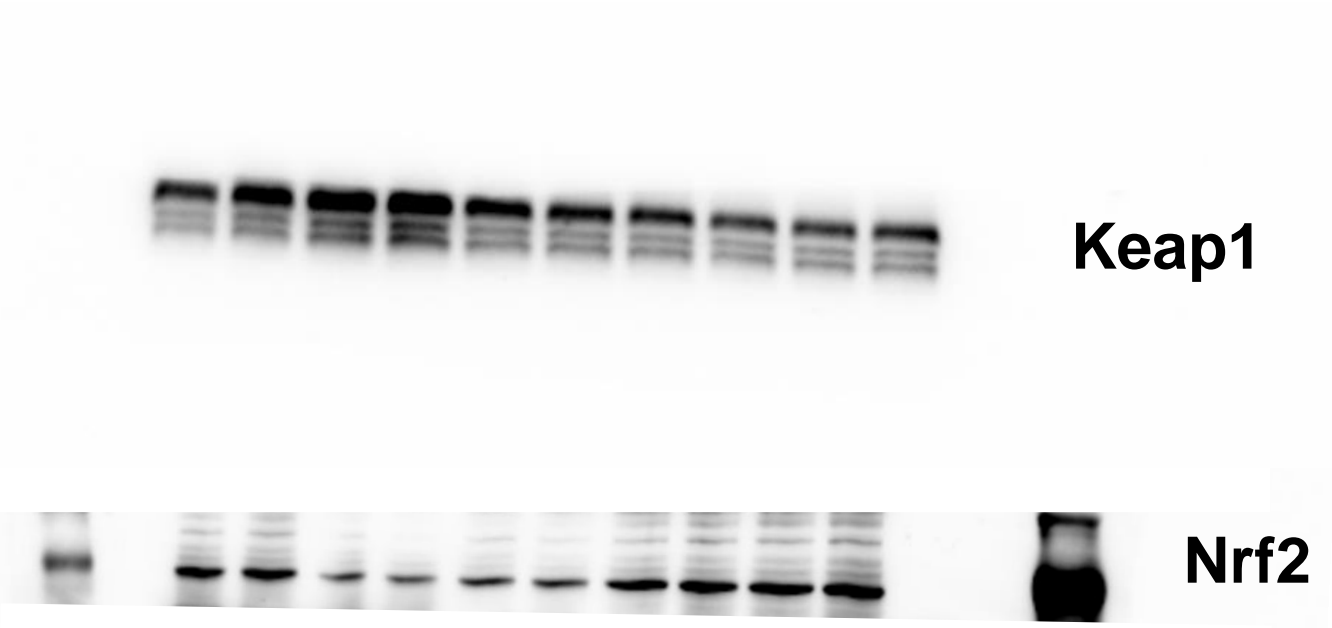

**Fig. 6**

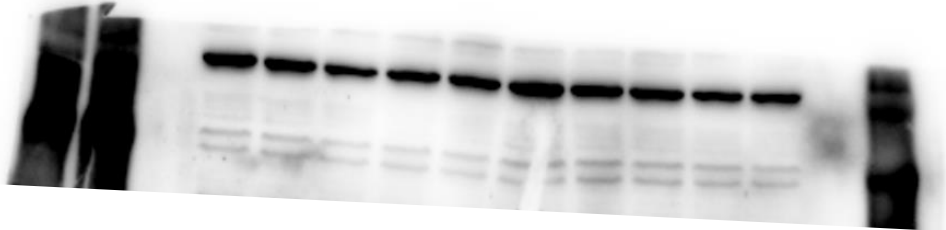

**$\beta$ -actin**

Supplement: d2fo02210a4.pdf [file d2fo02210a4.pdf]
